# Supplementary material
Source: publisher figshare collection journal article supplement (https://gsapubs.figshare.com/ndownloader/files/23937431)
Supplement: Supplementary file 1 [file 23937431]

## Sheet: Cambrian
Mesoproterozoic–Cretaceous provenance and paleogeographic evolution of the Northern Rockies: Insights from the detrital zircon record of the Bridger Range, MT, USA
GSA Data Reposity Item 20XXxxx. Table DR3. NMF sources, source weights, and goodness of fit metrics.
Reconstructed Source Distributions							Compare Input & Reconstructed Sink Samples					Sink Sample Weights
Age (Ma)	Source 1	Source 2	Source 3	Source 4				Mean		St. Dev.			C-42	C-43	C-44	C-45	C-46	C-47	C-48	C-49	C-50	C-51	C-52	C-53	Cf
0	0	0	3.99132e-08	6.46327e-08			Cross-correlation	0.813839	±	0.213414		Weights Source 1	0	0	0	0	0.00120586	0	0	0	0.0547571	0.912433	0.492905	0	0	0.25
1	0	0	3.99133e-08	6.46328e-08			Likeness	0.736583	±	0.10788		Weights Source 2	0.0169137	0	0.017359	0.0532199	0.976115	0.91349	0.172979	0	0	0.00235991	0	0	0.490803	0.25
2	0	0	3.99134e-08	6.46329e-08			Kuiper V Value	0.215033	±	0.100394		Weights Source 3	0	0.352117	0.0253572	0	0.0226788	0.0459345	0.662161	0.22653	0	0.0852066	0	1	0.0417186	0.25
3	0	0	3.99134e-08	6.4633e-08			KS D Value	0.165369	±	0.101933		Weights Source 4	0.983086	0.647883	0.957284	0.94678	0	0.0405755	0.164859	0.77347	0.945243	0	0.507095	0	0.467479	0.25
4	0	0	3.99135e-08	6.4633e-08
5	0	0	3.99135e-08	6.46331e-08			Number of sink samples	13				Cross-correlation	0.948414	0.930498	0.960137	0.854081	0.814637	0.83569	0.972805	0.92379	0.515638	0.929844	0.630019	0.987	0.277358
6	0	0	3.99135e-08	6.46331e-08			Mean Cross-correlation of sink samples	0.239				Likeness	0.809099	0.748514	0.840999	0.754517	0.710188	0.679095	0.835419	0.732625	0.568483	0.826709	0.646992	0.889767	0.533178
7	0	0	3.99135e-08	6.46332e-08			Range Cross-correlation of sink samples	0.977				Kuiper V Value	0.157929	0.168006	0.147527	0.230429	0.216041	0.297125	0.0722985	0.25724	0.43057	0.152801	0.312257	0.079007	0.274204
8	0	0	3.99136e-08	6.46332e-08			Mean Kuiper V value of sink samples	0.629				KS D Value	0.0944723	0.112988	0.12404	0.20386	0.181718	0.250173	0.0464303	0.149641	0.403038	0.0792809	0.189314	0.0406409	0.274202
9	0	0	3.99136e-08	6.46332e-08			Range Kuiper V value of sink samples	0.87
10	0	0	3.99136e-08	6.46333e-08			Final Residual	0.101137
11	0	0	3.99136e-08	6.46333e-08			Number of Iterations	140
12	0	0	3.99136e-08	6.46333e-08
13	0	0	3.99136e-08	6.46333e-08
14	0	0	3.99136e-08	6.46332e-08
15	0	0	3.99136e-08	6.46332e-08
16	0	0	3.99135e-08	6.46332e-08
17	0	0	3.99135e-08	6.46331e-08
18	0	0	3.99135e-08	6.46331e-08
19	0	0	3.99134e-08	6.4633e-08
20	0	0	3.99134e-08	6.46329e-08
21	0	0	3.99133e-08	6.46328e-08
22	0	0	3.99133e-08	6.46327e-08
23	0	0	3.99132e-08	6.46326e-08
24	0	0	3.99131e-08	6.46325e-08
25	0	0	3.99131e-08	6.46324e-08
26	0	0	3.9913e-08	6.46323e-08
27	0	0	3.99129e-08	6.46321e-08
28	0	0	3.99128e-08	6.4632e-08
29	0	0	3.99127e-08	6.46318e-08
30	0	0	3.99126e-08	6.46317e-08
31	0	0	3.99125e-08	6.46315e-08
32	0	0	3.99124e-08	6.46313e-08
33	0	0	3.99123e-08	6.46311e-08
34	0	0	3.99122e-08	6.46309e-08
35	0	0	3.9912e-08	6.46307e-08
36	0	0	3.99119e-08	6.46305e-08
37	0	0	3.99117e-08	6.46303e-08
38	0	0	3.99116e-08	6.463e-08
39	0	0	3.99114e-08	6.46298e-08
40	0	0	3.99113e-08	6.46295e-08
41	0	0	3.99111e-08	6.46293e-08
42	0	0	3.9911e-08	6.4629e-08
43	0	0	3.99108e-08	6.46287e-08
44	0	0	3.99106e-08	6.46284e-08
45	0	0	3.99104e-08	6.46281e-08
46	0	0	3.99102e-08	6.46278e-08
47	0	0	3.991e-08	6.46275e-08
48	0	0	3.99098e-08	6.46272e-08
49	0	0	3.99096e-08	6.46268e-08
50	0	0	3.99094e-08	6.46265e-08
51	0	0	3.99092e-08	6.46261e-08
52	0	0	3.9909e-08	6.46258e-08
53	0	0	3.99087e-08	6.46254e-08
54	0	0	3.99085e-08	6.4625e-08
55	0	0	3.99083e-08	6.46246e-08
56	0	0	3.9908e-08	6.46242e-08
57	0	0	3.99078e-08	6.46238e-08
58	0	0	3.99075e-08	6.46234e-08
59	0	0	3.99072e-08	6.4623e-08
60	0	0	3.9907e-08	6.46225e-08
61	0	0	3.99067e-08	6.46221e-08
62	0	0	3.99064e-08	6.46216e-08
63	0	0	3.99061e-08	6.46212e-08
64	0	0	3.99058e-08	6.46207e-08
65	0	0	3.99055e-08	6.46202e-08
66	0	0	3.99052e-08	6.46197e-08
67	0	0	3.99049e-08	6.46192e-08
68	0	0	3.99046e-08	6.46187e-08
69	0	0	3.99043e-08	6.46182e-08
70	0	0	3.9904e-08	6.46177e-08
71	0	0	3.99037e-08	6.46172e-08
72	0	0	3.99033e-08	6.46166e-08
73	0	0	3.9903e-08	6.46161e-08
74	0	0	3.99026e-08	6.46155e-08
75	0	0	3.99023e-08	6.46149e-08
76	0	0	3.99019e-08	6.46144e-08
77	0	0	3.99016e-08	6.46138e-08
78	0	0	3.99012e-08	6.46132e-08
79	0	0	3.99008e-08	6.46126e-08
80	0	0	3.99004e-08	6.4612e-08
81	0	0	3.99001e-08	6.46113e-08
82	0	0	3.98997e-08	6.46107e-08
83	0	0	3.98993e-08	6.46101e-08
84	0	0	3.98989e-08	6.46094e-08
85	0	0	3.98985e-08	6.46087e-08
86	0	0	3.9898e-08	6.46081e-08
87	0	0	3.98976e-08	6.46074e-08
88	0	0	3.98972e-08	6.46067e-08
89	0	0	3.98968e-08	6.4606e-08
90	0	0	3.98963e-08	6.46053e-08
91	0	0	3.98959e-08	6.46046e-08
92	0	0	3.98954e-08	6.46039e-08
93	0	0	3.9895e-08	6.46031e-08
94	0	0	3.98945e-08	6.46024e-08
95	0	0	3.98941e-08	6.46017e-08
96	0	0	3.98936e-08	6.46009e-08
97	0	0	3.98931e-08	6.46001e-08
98	0	0	3.98927e-08	6.45993e-08
99	0	0	3.98922e-08	6.45986e-08
100	0	0	3.98917e-08	6.45978e-08
101	0	0	3.98912e-08	6.4597e-08
102	0	0	3.98907e-08	6.45962e-08
103	0	0	3.98902e-08	6.45953e-08
104	0	0	3.98897e-08	6.45945e-08
105	0	0	3.98891e-08	6.45937e-08
106	0	0	3.98886e-08	6.45928e-08
107	0	0	3.98881e-08	6.4592e-08
108	0	0	3.98875e-08	6.45911e-08
109	0	0	3.9887e-08	6.45902e-08
110	0	0	3.98865e-08	6.45893e-08
111	0	0	3.98859e-08	6.45884e-08
112	0	0	3.98854e-08	6.45875e-08
113	0	0	3.98848e-08	6.45866e-08
114	0	0	3.98842e-08	6.45857e-08
115	0	0	3.98836e-08	6.45848e-08
116	0	0	3.98831e-08	6.45838e-08
117	0	0	3.98825e-08	6.45829e-08
118	0	0	3.98819e-08	6.45819e-08
119	0	0	3.98813e-08	6.4581e-08
120	0	0	3.98807e-08	6.458e-08
121	0	0	3.98801e-08	6.4579e-08
122	0	0	3.98795e-08	6.4578e-08
123	0	0	3.98789e-08	6.4577e-08
124	0	0	3.98782e-08	6.4576e-08
125	0	0	3.98776e-08	6.4575e-08
126	0	0	3.9877e-08	6.45739e-08
127	0	0	3.98763e-08	6.45729e-08
128	0	0	3.98757e-08	6.45719e-08
129	0	0	3.9875e-08	6.45708e-08
130	0	0	3.98744e-08	6.45697e-08
131	0	0	3.98737e-08	6.45687e-08
132	0	0	3.9873e-08	6.45676e-08
133	0	0	3.98724e-08	6.45665e-08
134	0	0	3.98717e-08	6.45654e-08
135	0	0	3.9871e-08	6.45643e-08
136	0	0	3.98703e-08	6.45632e-08
137	0	0	3.98696e-08	6.4562e-08
138	0	0	3.98689e-08	6.45609e-08
139	0	0	3.98682e-08	6.45598e-08
140	0	0	3.98675e-08	6.45586e-08
141	0	0	3.98668e-08	6.45574e-08
142	0	0	3.9866e-08	6.45563e-08
143	0	0	3.98653e-08	6.45551e-08
144	0	0	3.98646e-08	6.45539e-08
145	0	0	3.98638e-08	6.45527e-08
146	0	0	3.98631e-08	6.45515e-08
147	0	0	3.98623e-08	6.45503e-08
148	0	0	3.98616e-08	6.4549e-08
149	0	0	3.98608e-08	6.45478e-08
150	0	0	3.98601e-08	6.45466e-08
151	0	0	3.98593e-08	6.45453e-08
152	0	0	3.98585e-08	6.45441e-08
153	0	0	3.98577e-08	6.45428e-08
154	0	0	3.98569e-08	6.45415e-08
155	0	0	3.98561e-08	6.45402e-08
156	0	0	3.98553e-08	6.45389e-08
157	0	0	3.98545e-08	6.45376e-08
158	0	0	3.98537e-08	6.45363e-08
159	0	0	3.98529e-08	6.4535e-08
160	0	0	3.98521e-08	6.45336e-08
161	0	0	3.98512e-08	6.45323e-08
162	0	0	3.98504e-08	6.45309e-08
163	0	0	3.98496e-08	6.45296e-08
164	0	0	3.98487e-08	6.45282e-08
165	0	0	3.98479e-08	6.45268e-08
166	0	0	3.9847e-08	6.45255e-08
167	0	0	3.98462e-08	6.45241e-08
168	0	0	3.98453e-08	6.45226e-08
169	0	0	3.98444e-08	6.45212e-08
170	0	0	3.98435e-08	6.45198e-08
171	0	0	3.98426e-08	6.45184e-08
172	0	0	3.98418e-08	6.45169e-08
173	0	0	3.98409e-08	6.45155e-08
174	0	0	3.984e-08	6.4514e-08
175	0	0	3.98391e-08	6.45126e-08
176	0	0	3.98381e-08	6.45111e-08
177	0	0	3.98372e-08	6.45096e-08
178	0	0	3.98363e-08	6.45081e-08
179	0	0	3.98354e-08	6.45066e-08
180	0	0	3.98344e-08	6.45051e-08
181	0	0	3.98335e-08	6.45036e-08
182	0	0	3.98325e-08	6.45021e-08
183	0	0	3.98316e-08	6.45005e-08
184	0	0	3.98306e-08	6.4499e-08
185	0	0	3.98297e-08	6.44974e-08
186	0	0	3.98287e-08	6.44959e-08
187	0	0	3.98277e-08	6.44943e-08
188	0	0	3.98268e-08	6.44927e-08
189	0	0	3.98258e-08	6.44911e-08
190	0	0	3.98248e-08	6.44895e-08
191	0	0	3.98238e-08	6.44879e-08
192	0	0	3.98228e-08	6.44863e-08
193	0	0	3.98218e-08	6.44847e-08
194	0	0	3.98207e-08	6.44831e-08
195	0	0	3.98197e-08	6.44815e-08
196	0	0	3.98187e-08	6.44799e-08
197	0	0	3.98176e-08	6.44782e-08
198	0	0	3.98166e-08	6.44766e-08
199	0	0	3.98155e-08	6.44749e-08
200	0	0	3.98145e-08	6.44733e-08
201	0	0	3.98134e-08	6.44716e-08
202	0	0	3.98123e-08	6.447e-08
203	0	0	3.98113e-08	6.44684e-08
204	0	0	3.98102e-08	6.44667e-08
205	0	0	3.98091e-08	6.44651e-08
206	0	0	3.9808e-08	6.44634e-08
207	0	0	3.98068e-08	6.44618e-08
208	0	0	3.98057e-08	6.44602e-08
209	0	0	3.98045e-08	6.44586e-08
210	0	0	3.98034e-08	6.4457e-08
211	0	0	3.98022e-08	6.44554e-08
212	0	0	3.9801e-08	6.44539e-08
213	0	0	3.97998e-08	6.44524e-08
214	0	0	3.97986e-08	6.44509e-08
215	0	0	3.97973e-08	6.44494e-08
216	0	0	3.97961e-08	6.44481e-08
217	0	0	3.97948e-08	6.44467e-08
218	0	0	3.97934e-08	6.44454e-08
219	0	0	3.97921e-08	6.44442e-08
220	0	0	3.97907e-08	6.44431e-08
221	0	0	3.97893e-08	6.44421e-08
222	0	0	3.97878e-08	6.44412e-08
223	0	0	3.97863e-08	6.44404e-08
224	0	0	3.97847e-08	6.44397e-08
225	0	0	3.97831e-08	6.44392e-08
226	0	0	3.97814e-08	6.44389e-08
227	0	0	3.97796e-08	6.44389e-08
228	0	0	3.97777e-08	6.4439e-08
229	0	0	3.97758e-08	6.44395e-08
230	0	0	3.97737e-08	6.44402e-08
231	0	0	3.97716e-08	6.44413e-08
232	0	0	3.97692e-08	6.44428e-08
233	0	0	3.97668e-08	6.44447e-08
234	0	0	3.97642e-08	6.44472e-08
235	0	0	3.97614e-08	6.44502e-08
236	0	0	3.97584e-08	6.44538e-08
237	0	0	3.97552e-08	6.44582e-08
238	0	0	3.97517e-08	6.44633e-08
239	0	0	3.97479e-08	6.44694e-08
240	0	0	3.97438e-08	6.44765e-08
241	0	0	3.97394e-08	6.44847e-08
242	0	0	3.97346e-08	6.44942e-08
243	0	0	3.97293e-08	6.45052e-08
244	0	0	3.97236e-08	6.45177e-08
245	0	0	3.97173e-08	6.4532e-08
246	0	0	3.97103e-08	6.45483e-08
247	0	0	3.97028e-08	6.45668e-08
248	0	0	3.96945e-08	6.45878e-08
249	0	0	3.96853e-08	6.46115e-08
250	0	0	3.96752e-08	6.46383e-08
251	0	0	3.96642e-08	6.46685e-08
252	0	0	3.9652e-08	6.47025e-08
253	0	0	3.96385e-08	6.47407e-08
254	0	0	3.96238e-08	6.47836e-08
255	0	0	3.96075e-08	6.48316e-08
256	0	0	3.95895e-08	6.48854e-08
257	0	0	3.95698e-08	6.49455e-08
258	0	0	3.95481e-08	6.50127e-08
259	0	0	3.95242e-08	6.50876e-08
260	0	0	3.9498e-08	6.5171e-08
261	0	0	3.94693e-08	6.52639e-08
262	0	0	3.94378e-08	6.53673e-08
263	0	0	3.94035e-08	6.54821e-08
264	0	0	3.93662e-08	6.56096e-08
265	0	0	3.93257e-08	6.57509e-08
266	0	0	3.9282e-08	6.59075e-08
267	0	0	3.92352e-08	6.60809e-08
268	0	0	3.91853e-08	6.62725e-08
269	0	0	3.91327e-08	6.64842e-08
270	0	0	3.9078e-08	6.67178e-08
271	0	0	3.9022e-08	6.69753e-08
272	0	0	3.89661e-08	6.72588e-08
273	0	0	3.89123e-08	6.75706e-08
274	0	0	3.8863e-08	6.79129e-08
275	2.50785e-09	0	3.87524e-08	6.81473e-08
276	6.13586e-09	0	3.86238e-08	6.83545e-08
277	1.04889e-08	0	3.84947e-08	6.85592e-08
278	1.57434e-08	0	3.83687e-08	6.87542e-08
279	2.21203e-08	0	3.82507e-08	6.893e-08
280	2.98957e-08	0	3.81472e-08	6.90735e-08
281	3.94129e-08	0	3.80668e-08	6.91681e-08
282	5.10972e-08	0	3.80205e-08	6.91922e-08
283	6.5473e-08	0	3.80223e-08	6.91185e-08
284	8.31836e-08	0	3.809e-08	6.89125e-08
285	1.05014e-07	0	3.82458e-08	6.85313e-08
286	1.31918e-07	0	3.85169e-08	6.79218e-08
287	1.65046e-07	0	3.89371e-08	6.7019e-08
288	2.05782e-07	0	3.95474e-08	6.57437e-08
289	2.55774e-07	0	4.03971e-08	6.40007e-08
290	3.16982e-07	0	4.15455e-08	6.16755e-08
291	3.91717e-07	0	4.30633e-08	5.86323e-08
292	4.82693e-07	0	4.50337e-08	5.47105e-08
293	5.93073e-07	0	4.75546e-08	4.97218e-08
294	7.26525e-07	0	5.074e-08	4.34467e-08
295	8.87278e-07	0	5.47221e-08	3.56313e-08
296	1.08018e-06	0	5.96527e-08	2.59834e-08
297	1.31075e-06	0	6.57056e-08	1.41691e-08
298	1.58519e-06	0	7.30188e-08	0
299	1.9063e-06	0	7.65543e-08	0
300	2.28538e-06	0	8.08101e-08	0
301	2.73104e-06	0	8.58983e-08	0
302	3.2528e-06	0	9.19433e-08	0
303	3.86111e-06	0	9.90813e-08	0
304	4.56733e-06	0	1.07461e-07	0
305	5.38376e-06	0	1.17244e-07	0
306	6.32356e-06	0	1.28602e-07	0
307	7.40069e-06	0	1.41719e-07	0
308	8.62984e-06	0	1.56786e-07	0
309	1.00262e-05	0	1.74004e-07	0
310	1.16054e-05	0	1.93575e-07	0
311	1.33829e-05	0	2.15703e-07	0
312	1.53743e-05	0	2.40588e-07	0
313	1.7594e-05	0	2.68422e-07	0
314	2.00557e-05	0	2.99377e-07	0
315	2.27712e-05	0	3.33605e-07	0
316	2.57499e-05	0	3.71224e-07	0
317	2.89983e-05	0	4.1231e-07	0
318	3.25191e-05	0	4.56889e-07	0
319	3.63103e-05	0	5.04924e-07	0
320	4.03651e-05	0	5.56305e-07	0
321	4.46701e-05	0	6.10843e-07	0
322	4.92058e-05	0	6.68255e-07	0
323	5.39453e-05	0	7.28165e-07	0
324	5.88545e-05	0	7.90092e-07	0
325	6.38913e-05	0	8.53453e-07	0
326	6.90066e-05	0	9.17563e-07	0
327	7.4144e-05	0	9.8164e-07	0
328	7.9241e-05	0	1.04482e-06	0
329	8.42296e-05	0	1.10616e-06	0
330	8.90382e-05	0	1.16467e-06	0
331	9.35928e-05	0	1.21932e-06	0
332	9.78191e-05	0	1.2691e-06	0
333	0.000101645	0	1.31299e-06	0
334	0.000105001	0	1.35005e-06	0
335	0.000107825	0	1.37941e-06	0
336	0.000110064	0	1.4003e-06	0
337	0.000111672	0	1.41213e-06	0
338	0.000112619	0	1.41443e-06	0
339	0.000112886	0	1.40692e-06	0
340	0.000112467	0	1.38953e-06	0
341	0.000111372	0	1.36237e-06	0
342	0.000109626	0	1.32573e-06	0
343	0.000107267	0	1.28012e-06	0
344	0.000104344	0	1.2262e-06	0
345	0.000100919	0	1.16479e-06	0
346	9.70639e-05	0	1.09682e-06	0
347	9.28549e-05	0	1.02333e-06	0
348	8.83744e-05	0	9.45416e-07	0
349	8.37067e-05	0	8.64203e-07	0
350	7.8936e-05	0	7.80813e-07	0
351	7.41438e-05	0	6.96338e-07	0
352	6.94073e-05	0	6.11808e-07	0
353	6.47975e-05	0	5.28171e-07	0
354	6.03779e-05	0	4.46273e-07	0
355	5.62035e-05	0	3.66843e-07	0
356	5.23202e-05	0	2.90492e-07	0
357	4.87645e-05	0	2.17701e-07	0
358	4.55639e-05	0	1.48828e-07	0
359	4.27368e-05	0	8.41133e-08	0
360	4.02936e-05	0	2.36871e-08	0
361	3.8224e-05	0	0	4.07784e-08
362	3.64907e-05	0	0	2.5033e-07
363	3.51384e-05	0	0	4.40751e-07
364	3.41541e-05	0	0	6.12832e-07
365	3.35217e-05	0	0	7.67549e-07
366	3.32227e-05	0	0	9.06005e-07
367	3.32373e-05	0	0	1.02938e-06
368	3.35451e-05	0	0	1.13889e-06
369	3.41256e-05	0	0	1.23574e-06
370	3.4959e-05	0	0	1.32108e-06
371	3.60262e-05	0	0	1.39602e-06
372	3.73095e-05	0	0	1.46158e-06
373	3.87924e-05	0	0	1.5187e-06
374	4.04599e-05	0	0	1.56822e-06
375	4.22985e-05	0	0	1.61089e-06
376	4.42958e-05	0	0	1.64737e-06
377	4.64411e-05	0	0	1.67822e-06
378	4.87246e-05	0	0	1.70394e-06
379	5.11376e-05	0	0	1.72494e-06
380	5.36725e-05	0	0	1.7416e-06
381	5.63221e-05	0	0	1.7542e-06
382	5.90802e-05	0	0	1.763e-06
383	6.1941e-05	0	0	1.76821e-06
384	6.48991e-05	0	0	1.77001e-06
385	6.79495e-05	0	0	1.76856e-06
386	7.10873e-05	0	0	1.76397e-06
387	7.4308e-05	0	0	1.75635e-06
388	7.76069e-05	0	0	1.7458e-06
389	8.09795e-05	0	0	1.73239e-06
390	8.44214e-05	0	0	1.71621e-06
391	8.7928e-05	0	0	1.69732e-06
392	9.14944e-05	0	0	1.67579e-06
393	9.51158e-05	0	0	1.65169e-06
394	9.87872e-05	0	0	1.62509e-06
395	0.000102503	0	0	1.59607e-06
396	0.000106259	0	0	1.56471e-06
397	0.000110049	0	0	1.53109e-06
398	0.000113867	0	0	1.49526e-06
399	0.000117709	0	0	1.45729e-06
400	0.00012157	0	0	1.41716e-06
401	0.000125447	0	0	1.37483e-06
402	0.000129337	0	0	1.3301e-06
403	0.000133243	0	0	1.28266e-06
404	0.000137169	0	0	1.23195e-06
405	0.000141125	0	0	1.17712e-06
406	0.000145126	0	0	1.11692e-06
407	0.000149198	0	0	1.04964e-06
408	0.000153374	0	0	9.72991e-07
409	0.000157699	0	0	8.84021e-07
410	0.00016223	0	0	7.79101e-07
411	0.000167035	0	0	6.53906e-07
412	0.000172194	0	0	5.03501e-07
413	0.000177793	0	0	3.22502e-07
414	0.000183921	0	0	1.05345e-07
415	0.000190624	0	0	0
416	0.000197977	0	0	0
417	0.000206063	0	0	0
418	0.000214907	0	0	0
419	0.000224496	0	0	0
420	0.000234767	0	4.5769e-08	0
421	0.00024561	0	1.63102e-07	0
422	0.000256872	0	2.87505e-07	0
423	0.000268352	0	4.16095e-07	0
424	0.000279816	0	5.45442e-07	0
425	0.000291015	0	6.71751e-07	0
426	0.000301703	0	7.91084e-07	0
427	0.000311665	0	8.99602e-07	0
428	0.000320738	0	9.93793e-07	0
429	0.000328834	0	1.07066e-06	0
430	0.000335965	0	1.12783e-06	0
431	0.000342251	0	1.16355e-06	0
432	0.00034793	0	1.1766e-06	0
433	0.000353353	0	1.16605e-06	0
434	0.000358977	0	1.13096e-06	0
435	0.000365344	0	1.06998e-06	0
436	0.000373055	0	9.81001e-07	0
437	0.000382736	0	8.60767e-07	0
438	0.000395	0	7.04682e-07	0
439	0.000410406	0	5.06746e-07	0
440	0.000429418	0	2.59745e-07	0
441	0.000452362	0	0	0
442	0.000479382	0	0	0
443	0.000510467	0	0	0
444	0.00054537	0	0	5.81246e-08
445	0.000583186	0	0	1.90058e-06
446	0.000623716	0	0	3.99178e-06
447	0.000666198	0	0	6.30364e-06
448	0.000709771	0	0	8.78481e-06
449	0.000753529	0	0	1.13597e-05
450	0.000796581	0	0	1.39303e-05
451	0.000838113	0	0	1.63798e-05
452	0.000877441	0	0	1.85799e-05
453	0.000914053	0	0	2.03992e-05
454	0.00094765	0	0	2.17129e-05
455	0.000978159	0	0	2.24131e-05
456	0.00100575	0	0	2.24176e-05
457	0.00103082	0	0	2.16768e-05
458	0.00105402	0	0	2.01776e-05
459	0.00107618	0	0	1.79442e-05
460	0.00109836	0	0	1.5035e-05
461	0.00112177	0	0	1.15369e-05
462	0.0011478	0	0	7.55649e-06
463	0.00117799	0	0	3.21111e-06
464	0.0012136	0	0	0
465	0.00125585	0	0	0
466	0.00130752	0	0	0
467	0.00137052	0	6.72382e-07	0
468	0.00144687	0	1.72825e-06	0
469	0.00153873	0	2.71536e-06	0
470	0.00164837	0	3.61807e-06	0
471	0.00177849	0	4.40645e-06	0
472	0.00193268	0	5.01176e-06	0
473	0.00211619	0	5.2894e-06	0
474	0.0023368	0	4.98067e-06	0
475	0.00260493	0	3.70646e-06	0
476	0.00293208	0	1.04342e-06	0
477	0.00332653	0	0	0
478	0.00378826	0	0	0
479	0.00430007	0	0	1.67566e-05
480	0.00484265	0	0	3.39308e-05
481	0.00539218	0	0	4.33967e-05
482	0.00593431	0	0	4.13002e-05
483	0.00647399	0	0	2.68281e-05
484	0.00703528	0	0	2.29149e-06
485	0.00764381	0	0	0
486	0.00833501	0	0	0
487	0.00912419	0	1.82434e-06	0
488	0.0100075	0	9.14683e-06	0
489	0.0109661	0	1.71992e-05	0
490	0.0119704	0	2.65661e-05	0
491	0.0129859	0	3.76165e-05	0
492	0.0139769	0	5.0398e-05	0
493	0.0149093	0	6.46501e-05	0
494	0.0157501	0	7.98538e-05	0
495	0.0164645	0	9.52656e-05	0
496	0.0170122	0	0.00010994	0
497	0.0173482	0	0.000122807	0
498	0.0174331	0	0.000132852	0
499	0.0172487	0	0.000139373	0
500	0.0168099	0	0.000142167	0
501	0.0161598	0	0.000141486	0
502	0.0153501	0	0.00013778	0
503	0.014422	0	0.000131444	0
504	0.0134053	0	0.000122803	0
505	0.0123313	0	0.000112285	0
506	0.0112437	0	0.000100555	0
507	0.0101924	0	8.84236e-05	0
508	0.00921818	0	7.66186e-05	0
509	0.00834047	0	6.56085e-05	0
510	0.0075586	0	5.55969e-05	0
511	0.00686057	0	4.66267e-05	0
512	0.00623215	0	3.86861e-05	0
513	0.00566162	0	3.17595e-05	0
514	0.00514091	0	2.58323e-05	0
515	0.0046649	0	2.08779e-05	0
516	0.00423033	0	1.68444e-05	0
517	0.00383479	0	1.36493e-05	0
518	0.003476	0	1.11817e-05	0
519	0.00315146	0	9.31247e-06	0
520	0.00285837	0	7.90734e-06	0
521	0.0025938	0	6.84138e-06	0
522	0.00235484	0	6.00959e-06	0
523	0.00213878	0	5.33258e-06	0
524	0.00194316	0	4.75713e-06	0
525	0.00176576	0	4.25266e-06	0
526	0.00160463	0	3.8055e-06	0
527	0.00145804	0	3.4126e-06	0
528	0.00132447	0	3.07588e-06	0
529	0.00120261	0	2.79794e-06	0
530	0.00109136	0	2.57934e-06	0
531	0.000989779	0	2.41739e-06	0
532	0.000897098	0	2.30606e-06	0
533	0.000811661	0	9.93861e-07	4.00456e-06
534	0.000733821	0	0	8.26132e-06
535	0.000663099	0	0	1.25027e-05
536	0.000599079	0	0	1.68412e-05
537	0.00054132	0	0	2.12598e-05
538	0.000489391	0	0	2.57229e-05
539	0.000442867	0	0	3.01761e-05
540	0.000401322	0	0	3.45491e-05
541	0.000364334	0	0	3.87587e-05
542	0.000331487	0	0	4.2714e-05
543	0.000302374	0	0	4.63209e-05
544	0.000276602	0	0	4.94881e-05
545	0.000253803	0	0	5.21318e-05
546	0.000233632	0	0	5.41808e-05
547	0.000215776	0	0	5.55803e-05
548	0.000199964	0	0	5.62943e-05
549	0.000185974	0	0	5.63077e-05
550	0.000173648	0	0	5.5625e-05
551	0.000162913	0	0	5.42696e-05
552	0.000153803	0	0	5.22797e-05
553	0.000146484	0	0	4.97045e-05
554	0.000141299	1.3137e-06	0	4.64977e-05
555	0.000138734	4.31459e-06	0	4.26867e-05
556	0.000139395	7.7859e-06	0	3.84187e-05
557	0.000143987	1.17355e-05	0	3.37439e-05
558	0.000153141	1.61584e-05	0	2.87155e-05
559	0.00016714	2.10314e-05	0	2.34025e-05
560	0.000185536	2.63072e-05	0	1.79107e-05
561	0.000206762	3.19092e-05	0	1.2403e-05
562	0.000227959	3.77287e-05	0	7.10924e-06
563	0.000245261	4.36287e-05	0	2.30827e-06
564	0.000254158	4.91511e-05	0	0
565	0.00025175	5.42063e-05	0	0
566	0.000237797	5.90662e-05	0	0
567	0.000213924	6.35912e-05	0	0
568	0.000183778	6.76422e-05	0	0
569	0.00015185	7.10878e-05	0	0
570	0.00012215	7.38119e-05	0	0
571	9.72833e-05	7.572e-05	0	0
572	7.82049e-05	7.67448e-05	0	0
573	6.45481e-05	7.68498e-05	0	0
574	5.52197e-05	7.60317e-05	0	0
575	4.89524e-05	7.43203e-05	0	0
576	4.46515e-05	7.17766e-05	0	0
577	4.1525e-05	6.84891e-05	0	0
578	3.90691e-05	6.4569e-05	0	0
579	3.69939e-05	6.01439e-05	0	0
580	3.51448e-05	5.53509e-05	0	0
581	3.34437e-05	5.03294e-05	0	0
582	3.1852e-05	4.52151e-05	0	0
583	3.035e-05	4.01338e-05	0	0
584	2.89272e-05	3.51967e-05	0	0
585	2.75768e-05	3.0497e-05	0	0
586	2.6294e-05	2.61082e-05	0	0
587	2.5075e-05	2.2083e-05	0	0
588	2.39163e-05	1.84546e-05	0	0
589	2.28149e-05	1.52374e-05	0	0
590	2.17679e-05	1.24301e-05	0	0
591	2.07726e-05	1.00184e-05	0	0
592	1.98267e-05	7.97776e-06	0	0
593	1.89276e-05	6.27645e-06	0	0
594	1.80732e-05	4.87861e-06	0	0
595	1.72613e-05	3.74645e-06	0	0
596	1.64882e-05	2.8401e-06	2.26423e-08	0
597	1.57511e-05	2.12258e-06	7.86231e-08	0
598	1.50517e-05	1.56546e-06	1.20366e-07	0
599	1.43879e-05	1.1388e-06	1.50598e-07	0
600	1.37579e-05	8.16492e-07	1.71691e-07	0
601	1.31599e-05	5.76311e-07	1.85665e-07	0
602	1.2592e-05	3.99755e-07	1.94198e-07	0
603	1.20528e-05	2.71732e-07	1.98654e-07	0
604	1.15405e-05	1.80171e-07	2.00123e-07	0
605	1.10539e-05	1.15596e-07	1.99455e-07	0
606	1.05913e-05	7.07013e-08	1.97305e-07	0
607	1.01516e-05	3.99506e-08	1.94162e-07	0
608	9.7335e-06	1.92182e-08	1.90389e-07	0
609	9.33574e-06	5.48008e-09	1.86248e-07	0
610	8.95724e-06	0	1.8151e-07	0
611	8.59694e-06	0	1.76451e-07	0
612	8.25377e-06	0	1.71686e-07	0
613	7.92679e-06	0	1.67181e-07	0
614	7.61508e-06	0	1.62908e-07	0
615	7.31779e-06	0	1.58847e-07	0
616	7.0341e-06	0	1.54981e-07	0
617	6.76325e-06	0	1.51295e-07	0
618	6.50451e-06	0	1.47777e-07	0
619	6.25719e-06	0	1.44416e-07	0
620	6.02066e-06	0	1.41201e-07	0
621	5.79431e-06	0	1.38126e-07	0
622	5.57756e-06	0	1.3518e-07	0
623	5.36989e-06	0	1.32358e-07	0
624	5.1708e-06	0	1.29652e-07	0
625	4.97981e-06	0	1.27055e-07	0
626	4.79648e-06	0	1.24562e-07	0
627	4.62041e-06	0	1.22167e-07	0
628	4.4512e-06	0	1.19866e-07	0
629	4.28851e-06	0	1.17652e-07	0
630	4.13198e-06	0	1.15522e-07	0
631	3.98131e-06	0	1.13471e-07	0
632	3.83621e-06	0	1.11496e-07	0
633	3.6964e-06	0	1.09592e-07	0
634	3.56162e-06	0	1.07757e-07	0
635	3.43165e-06	0	1.05986e-07	0
636	3.30625e-06	0	1.04278e-07	0
637	3.18523e-06	0	1.02629e-07	0
638	3.06838e-06	0	1.01037e-07	0
639	2.95553e-06	0	9.94985e-08	0
640	2.84652e-06	0	9.80123e-08	0
641	2.74117e-06	0	9.65759e-08	0
642	2.63936e-06	0	9.51875e-08	0
643	2.54093e-06	0	9.3845e-08	0
644	2.44577e-06	0	9.25468e-08	0
645	2.35375e-06	0	9.12912e-08	0
646	2.26476e-06	0	9.00768e-08	0
647	2.1787e-06	0	8.8902e-08	0
648	2.09545e-06	0	8.77656e-08	0
649	2.01494e-06	0	8.66662e-08	0
650	1.93707e-06	0	8.56027e-08	0
651	1.86175e-06	0	8.45739e-08	0
652	1.78891e-06	0	8.35787e-08	0
653	1.71847e-06	0	8.26162e-08	0
654	1.65036e-06	0	8.16852e-08	0
655	1.5845e-06	0	8.0785e-08	0
656	1.52085e-06	0	7.99145e-08	0
657	1.45932e-06	0	7.9073e-08	0
658	1.39986e-06	0	7.82596e-08	0
659	1.34242e-06	0	7.74735e-08	0
660	1.28693e-06	0	7.6714e-08	0
661	1.23334e-06	0	7.59803e-08	0
662	1.1816e-06	0	7.52718e-08	0
663	1.13166e-06	0	7.45877e-08	0
664	1.08347e-06	0	7.39273e-08	0
665	1.03698e-06	0	7.329e-08	0
666	9.92145e-07	0	7.26753e-08	0
667	9.48253e-07	0	7.12563e-08	2.66189e-09
668	9.05923e-07	0	6.98563e-08	5.33099e-09
669	8.65139e-07	0	6.85073e-08	7.90243e-09
670	8.25856e-07	0	6.72079e-08	1.03789e-08
671	7.88034e-07	0	6.59566e-08	1.27632e-08
672	7.51631e-07	0	6.47521e-08	1.50578e-08
673	7.16606e-07	0	6.35931e-08	1.72653e-08
674	6.82919e-07	0	6.24781e-08	1.93882e-08
675	6.50532e-07	0	6.14061e-08	2.1429e-08
676	6.19406e-07	0	6.03757e-08	2.33901e-08
677	5.89504e-07	0	5.93856e-08	2.52739e-08
678	5.60789e-07	0	5.84346e-08	2.70826e-08
679	5.33225e-07	0	5.75217e-08	2.88186e-08
680	5.06777e-07	0	5.66455e-08	3.04841e-08
681	4.81409e-07	0	5.5805e-08	3.20812e-08
682	4.57089e-07	0	5.4999e-08	3.36122e-08
683	4.33782e-07	0	5.42265e-08	3.50791e-08
684	4.11457e-07	0	5.34863e-08	3.64841e-08
685	3.9008e-07	0	5.27773e-08	3.78291e-08
686	3.6962e-07	0	5.20987e-08	3.91161e-08
687	3.50047e-07	0	5.14493e-08	4.0347e-08
688	3.31331e-07	0	5.08281e-08	4.15238e-08
689	3.13442e-07	0	5.02343e-08	4.26484e-08
690	2.96352e-07	0	4.96667e-08	4.37225e-08
691	2.80031e-07	0	4.91246e-08	4.47479e-08
692	2.64454e-07	0	4.86069e-08	4.57263e-08
693	2.49592e-07	0	4.81129e-08	4.66595e-08
694	2.3542e-07	0	4.76416e-08	4.75491e-08
695	2.21913e-07	0	4.71923e-08	4.83967e-08
696	2.09045e-07	0	4.6764e-08	4.92039e-08
697	1.96792e-07	0	4.6356e-08	4.99722e-08
698	1.85131e-07	0	4.59675e-08	5.07032e-08
699	1.74038e-07	0	4.55978e-08	5.13982e-08
700	1.63491e-07	0	4.5246e-08	5.20586e-08
701	1.5347e-07	0	4.49116e-08	5.26859e-08
702	1.43951e-07	0	4.45938e-08	5.32814e-08
703	1.34916e-07	0	4.42919e-08	5.38464e-08
704	1.26344e-07	0	4.40053e-08	5.4382e-08
705	1.18217e-07	0	4.37334e-08	5.48896e-08
706	1.10515e-07	0	4.34754e-08	5.53702e-08
707	1.0322e-07	0	4.3231e-08	5.58252e-08
708	9.63158e-08	0	4.29993e-08	5.62554e-08
709	8.97847e-08	0	4.278e-08	5.66621e-08
710	8.36107e-08	0	4.25725e-08	5.70462e-08
711	7.7778e-08	0	4.23762e-08	5.74087e-08
712	7.22717e-08	0	4.21907e-08	5.77505e-08
713	6.7077e-08	0	4.20154e-08	5.80727e-08
714	6.21799e-08	0	4.185e-08	5.83761e-08
715	5.75669e-08	0	4.16939e-08	5.86615e-08
716	5.3225e-08	0	4.15468e-08	5.89297e-08
717	4.91417e-08	0	4.14082e-08	5.91816e-08
718	4.5305e-08	0	4.12777e-08	5.94179e-08
719	4.17033e-08	0	4.1155e-08	5.96394e-08
720	3.83256e-08	0	4.10396e-08	5.98467e-08
721	3.51613e-08	0	4.09313e-08	6.00405e-08
722	3.22003e-08	0	4.08297e-08	6.02214e-08
723	2.94327e-08	0	4.07345e-08	6.03902e-08
724	2.68494e-08	0	4.06453e-08	6.05472e-08
725	2.44415e-08	0	4.05619e-08	6.06932e-08
726	2.22004e-08	0	4.0484e-08	6.08286e-08
727	2.01181e-08	0	4.04114e-08	6.0954e-08
728	1.81868e-08	0	4.03437e-08	6.10698e-08
729	1.63993e-08	0	4.02808e-08	6.11766e-08
730	1.47485e-08	0	4.02223e-08	6.12747e-08
731	1.32277e-08	0	4.01682e-08	6.13645e-08
732	1.18308e-08	0	4.01181e-08	6.14466e-08
733	1.05516e-08	0	4.00719e-08	6.15212e-08
734	9.3844e-09	0	4.00294e-08	6.15886e-08
735	8.32394e-09	0	3.99904e-08	6.16494e-08
736	7.36505e-09	0	3.99548e-08	6.17037e-08
737	6.50292e-09	0	3.99224e-08	6.17519e-08
738	5.733e-09	0	3.98929e-08	6.17943e-08
739	5.05099e-09	0	3.98664e-08	6.18311e-08
740	4.45284e-09	0	3.98427e-08	6.18626e-08
741	3.93475e-09	0	3.98215e-08	6.1889e-08
742	3.49313e-09	0	3.98029e-08	6.19106e-08
743	3.12464e-09	0	3.97867e-08	6.19275e-08
744	2.82611e-09	0	3.97728e-08	6.194e-08
745	2.59462e-09	0	3.97611e-08	6.19483e-08
746	2.42742e-09	0	3.97516e-08	6.19525e-08
747	2.32194e-09	0	3.9744e-08	6.19528e-08
748	2.27581e-09	0	3.97384e-08	6.19494e-08
749	2.28681e-09	0	3.97347e-08	6.19423e-08
750	2.35292e-09	0	3.97328e-08	6.19317e-08
751	2.47225e-09	0	3.97327e-08	6.19178e-08
752	2.64305e-09	0	3.97342e-08	6.19006e-08
753	2.86376e-09	0	3.97374e-08	6.18803e-08
754	3.13291e-09	0	3.97422e-08	6.18568e-08
755	3.4492e-09	0	3.97485e-08	6.18304e-08
756	3.81143e-09	0	3.97563e-08	6.18011e-08
757	4.21854e-09	0	3.97657e-08	6.17689e-08
758	4.66959e-09	0	3.97764e-08	6.1734e-08
759	5.16372e-09	0	3.97886e-08	6.16963e-08
760	5.70023e-09	0	3.98022e-08	6.16559e-08
761	6.27847e-09	0	3.98171e-08	6.16129e-08
762	6.89792e-09	0	3.98334e-08	6.15673e-08
763	7.55814e-09	0	3.9851e-08	6.15191e-08
764	8.25879e-09	0	3.987e-08	6.14683e-08
765	8.99961e-09	0	3.98903e-08	6.1415e-08
766	9.78042e-09	0	3.99119e-08	6.13591e-08
767	1.06011e-08	0	3.99348e-08	6.13007e-08
768	1.14617e-08	0	3.9959e-08	6.12398e-08
769	1.23623e-08	0	3.99845e-08	6.11764e-08
770	1.33029e-08	0	4.00114e-08	6.11104e-08
771	1.42838e-08	0	4.00395e-08	6.10418e-08
772	1.53052e-08	0	4.0069e-08	6.09707e-08
773	1.63675e-08	0	4.00999e-08	6.0897e-08
774	1.7471e-08	0	4.01321e-08	6.08207e-08
775	1.86162e-08	0	4.01656e-08	6.07418e-08
776	1.98036e-08	0	4.02006e-08	6.06601e-08
777	2.10338e-08	0	4.0237e-08	6.05758e-08
778	2.23074e-08	0	4.02748e-08	6.04887e-08
779	2.36251e-08	0	4.0314e-08	6.03988e-08
780	2.49876e-08	0	4.03547e-08	6.03061e-08
781	2.63957e-08	0	4.03969e-08	6.02105e-08
782	2.78501e-08	0	4.04407e-08	6.01119e-08
783	2.93519e-08	0	4.0486e-08	6.00104e-08
784	3.0902e-08	0	4.05328e-08	5.99058e-08
785	3.25012e-08	0	4.05813e-08	5.97981e-08
786	3.41507e-08	0	4.06315e-08	5.96872e-08
787	3.58515e-08	0	4.06833e-08	5.9573e-08
788	3.76048e-08	0	4.07369e-08	5.94555e-08
789	3.94118e-08	0	4.07922e-08	5.93346e-08
790	4.12735e-08	0	4.08493e-08	5.92103e-08
791	4.31914e-08	0	4.09083e-08	5.90824e-08
792	4.51668e-08	0	4.09692e-08	5.89508e-08
793	4.72009e-08	0	4.1032e-08	5.88156e-08
794	4.92953e-08	0	4.10968e-08	5.86765e-08
795	5.14514e-08	0	4.11636e-08	5.85335e-08
796	5.36706e-08	0	4.12325e-08	5.83865e-08
797	5.59546e-08	0	4.13035e-08	5.82354e-08
798	5.8305e-08	0	4.13767e-08	5.80801e-08
799	6.07235e-08	0	4.14522e-08	5.79205e-08
800	6.32116e-08	0	4.15299e-08	5.77565e-08
801	6.57713e-08	0	4.161e-08	5.7588e-08
802	6.84044e-08	0	4.16925e-08	5.74148e-08
803	7.11126e-08	0	4.17775e-08	5.72368e-08
804	7.3898e-08	0	4.1865e-08	5.7054e-08
805	7.67625e-08	0	4.19552e-08	5.68662e-08
806	7.97082e-08	0	4.2048e-08	5.66732e-08
807	8.27372e-08	0	4.21435e-08	5.64749e-08
808	8.58516e-08	0	4.22419e-08	5.62713e-08
809	8.90537e-08	0	4.23432e-08	5.60621e-08
810	9.23457e-08	0	4.24474e-08	5.58472e-08
811	9.57301e-08	0	4.25546e-08	5.56265e-08
812	9.92092e-08	0	4.2665e-08	5.53997e-08
813	1.02786e-07	0	4.27786e-08	5.51669e-08
814	1.06462e-07	0	4.28954e-08	5.49277e-08
815	1.1024e-07	0	4.30157e-08	5.4682e-08
816	1.14124e-07	0	4.31394e-08	5.44296e-08
817	1.18116e-07	0	4.32666e-08	5.41705e-08
818	1.22218e-07	0	4.33975e-08	5.39043e-08
819	1.26434e-07	0	4.35322e-08	5.3631e-08
820	1.30767e-07	0	4.36707e-08	5.33502e-08
821	1.3522e-07	0	4.38131e-08	5.30619e-08
822	1.39796e-07	0	4.39596e-08	5.27658e-08
823	1.44499e-07	0	4.41103e-08	5.24616e-08
824	1.49331e-07	0	4.42653e-08	5.21493e-08
825	1.54296e-07	0	4.44246e-08	5.18286e-08
826	1.59399e-07	0	4.45884e-08	5.14992e-08
827	1.64642e-07	0	4.47569e-08	5.11609e-08
828	1.70029e-07	0	4.49302e-08	5.08134e-08
829	1.75564e-07	0	4.51083e-08	5.04566e-08
830	1.81252e-07	0	4.52914e-08	5.00902e-08
831	1.87096e-07	0	4.54797e-08	4.97139e-08
832	1.93101e-07	0	4.56733e-08	4.93274e-08
833	1.9927e-07	0	4.58723e-08	4.89305e-08
834	2.0561e-07	0	4.60769e-08	4.85228e-08
835	2.12123e-07	0	4.62873e-08	4.81042e-08
836	2.18815e-07	0	4.65035e-08	4.76742e-08
837	2.25691e-07	0	4.67258e-08	4.72326e-08
838	2.32756e-07	0	4.69544e-08	4.67791e-08
839	2.40015e-07	0	4.71893e-08	4.63133e-08
840	2.47473e-07	0	4.74308e-08	4.58349e-08
841	2.55137e-07	0	4.7679e-08	4.53436e-08
842	2.6301e-07	0	4.79342e-08	4.48389e-08
843	2.711e-07	0	4.81965e-08	4.43206e-08
844	2.79412e-07	0	4.84662e-08	4.37882e-08
845	2.87953e-07	0	4.87434e-08	4.32414e-08
846	2.96728e-07	0	4.90283e-08	4.26797e-08
847	3.05745e-07	0	4.93211e-08	4.21028e-08
848	3.15009e-07	0	4.96222e-08	4.15102e-08
849	3.24529e-07	0	4.99316e-08	4.09015e-08
850	3.3431e-07	0	5.02497e-08	4.02762e-08
851	3.4436e-07	0	5.05766e-08	3.96339e-08
852	3.54687e-07	0	5.09127e-08	3.89741e-08
853	3.65299e-07	0	5.12582e-08	3.82964e-08
854	3.76203e-07	0	5.16133e-08	3.76001e-08
855	3.87407e-07	0	5.19782e-08	3.68849e-08
856	3.9892e-07	0	5.23534e-08	3.61502e-08
857	4.10751e-07	0	5.27391e-08	3.53954e-08
858	4.22907e-07	0	5.31355e-08	3.46199e-08
859	4.354e-07	0	5.35429e-08	3.38233e-08
860	4.48236e-07	0	5.39617e-08	3.30048e-08
861	4.61428e-07	0	5.43922e-08	3.2164e-08
862	4.74983e-07	0	5.48348e-08	3.13001e-08
863	4.88912e-07	0	5.52896e-08	3.04126e-08
864	5.03227e-07	0	5.57571e-08	2.95008e-08
865	5.17936e-07	0	5.62377e-08	2.8564e-08
866	5.33052e-07	0	5.67317e-08	2.76015e-08
867	5.48586e-07	0	5.72394e-08	2.66126e-08
868	5.64549e-07	0	5.77613e-08	2.55966e-08
869	5.80952e-07	0	5.82978e-08	2.45527e-08
870	5.97809e-07	0	5.88492e-08	2.34801e-08
871	6.15132e-07	0	5.94159e-08	2.23782e-08
872	6.32933e-07	0	5.99984e-08	2.1246e-08
873	6.51225e-07	0	6.05971e-08	2.00827e-08
874	6.70022e-07	0	6.12125e-08	1.88875e-08
875	6.89338e-07	0	6.1845e-08	1.76595e-08
876	7.09187e-07	0	6.2495e-08	1.63979e-08
877	7.29583e-07	0	6.31631e-08	1.51016e-08
878	7.50541e-07	0	6.38497e-08	1.37699e-08
879	7.72076e-07	0	6.45554e-08	1.24016e-08
880	7.94204e-07	0	6.52806e-08	1.09959e-08
881	8.16941e-07	0	6.60259e-08	9.55175e-09
882	8.40302e-07	0	6.67918e-08	8.06809e-09
883	8.64304e-07	0	6.75788e-08	6.5439e-09
884	8.88965e-07	0	6.83876e-08	4.9781e-09
885	9.14302e-07	0	6.92186e-08	3.3696e-09
886	9.40332e-07	0	7.00725e-08	1.71728e-09
887	9.67073e-07	0	7.09499e-08	2.00038e-11
888	9.94113e-07	0	7.13165e-08	0
889	1.02188e-06	0	7.16869e-08	0
890	1.05041e-06	0	7.20675e-08	0
891	1.07972e-06	0	7.24587e-08	0
892	1.10981e-06	0	7.28607e-08	0
893	1.14072e-06	0	7.32738e-08	0
894	1.17247e-06	0	7.36982e-08	0
895	1.20508e-06	0	7.41342e-08	0
896	1.23856e-06	0	7.45822e-08	0
897	1.27293e-06	0	7.50423e-08	0
898	1.30823e-06	0	7.5515e-08	0
899	1.34448e-06	0	7.60005e-08	0
900	1.38168e-06	0	7.64991e-08	0
901	1.41988e-06	0	7.70111e-08	0
902	1.45909e-06	0	7.75368e-08	0
903	1.49933e-06	0	7.80767e-08	0
904	1.54064e-06	0	7.86309e-08	0
905	1.58303e-06	0	7.91998e-08	0
906	1.62652e-06	0	7.97839e-08	0
907	1.67115e-06	0	8.03833e-08	0
908	1.71694e-06	0	8.09985e-08	0
909	1.76392e-06	0	8.16297e-08	0
910	1.81211e-06	0	8.22775e-08	0
911	1.86153e-06	0	8.2942e-08	0
912	1.91222e-06	0	8.36238e-08	0
913	1.9642e-06	0	8.4323e-08	0
914	2.0175e-06	0	8.50402e-08	0
915	2.07214e-06	0	8.57757e-08	0
916	2.12816e-06	0	8.65298e-08	0
917	2.18558e-06	0	8.73029e-08	0
918	2.24442e-06	0	8.80955e-08	0
919	2.30473e-06	0	8.89079e-08	0
920	2.36652e-06	0	8.97405e-08	0
921	2.42983e-06	0	9.05937e-08	0
922	2.49468e-06	0	9.14679e-08	0
923	2.56111e-06	0	9.23634e-08	0
924	2.62914e-06	0	9.32808e-08	0
925	2.6988e-06	0	9.42203e-08	0
926	2.77012e-06	0	9.51824e-08	0
927	2.84314e-06	0	9.61675e-08	0
928	2.91788e-06	0	9.71759e-08	0
929	2.99436e-06	0	9.82082e-08	0
930	3.07263e-06	0	9.92647e-08	0
931	3.15272e-06	0	1.00346e-07	0
932	3.23464e-06	0	1.01452e-07	0
933	3.31843e-06	0	1.02583e-07	0
934	3.40413e-06	0	1.03741e-07	0
935	3.49176e-06	0	1.04924e-07	0
936	3.58135e-06	0	1.06135e-07	0
937	3.67293e-06	0	1.07372e-07	0
938	3.76654e-06	0	1.08637e-07	0
939	3.8622e-06	0	1.0993e-07	0
940	3.95994e-06	0	1.11251e-07	0
941	4.05979e-06	0	1.12601e-07	0
942	4.16179e-06	0	1.1398e-07	0
943	4.26597e-06	0	1.15388e-07	0
944	4.37234e-06	0	1.16826e-07	0
945	4.48095e-06	0	1.18295e-07	0
946	4.59182e-06	0	1.19795e-07	0
947	4.70498e-06	0	1.21325e-07	0
948	4.82047e-06	0	1.22888e-07	0
949	4.93831e-06	0	1.24482e-07	0
950	5.05853e-06	0	1.26108e-07	0
951	5.18116e-06	0	1.27768e-07	0
952	5.30623e-06	0	1.2946e-07	0
953	5.43378e-06	0	1.31186e-07	0
954	5.56382e-06	0	1.32946e-07	0
955	5.69639e-06	0	1.3474e-07	0
956	5.83152e-06	0	1.3657e-07	0
957	5.96924e-06	0	1.38434e-07	0
958	6.10958e-06	0	1.40334e-07	0
959	6.25256e-06	0	1.4227e-07	0
960	6.39822e-06	0	1.44242e-07	0
961	6.54659e-06	0	1.46251e-07	0
962	6.69769e-06	0	1.48297e-07	0
963	6.85156e-06	0	1.50381e-07	0
964	7.00822e-06	0	1.52503e-07	0
965	7.16771e-06	0	1.54663e-07	0
966	7.33005e-06	0	1.56862e-07	0
967	7.49528e-06	0	1.591e-07	0
968	7.66342e-06	0	1.61378e-07	0
969	7.83452e-06	0	1.63695e-07	0
970	8.00858e-06	0	1.66054e-07	0
971	8.18566e-06	0	1.68453e-07	0
972	8.36578e-06	0	1.70893e-07	0
973	8.54897e-06	0	1.73376e-07	0
974	8.73527e-06	0	1.759e-07	0
975	8.9247e-06	0	1.78467e-07	0
976	9.1173e-06	0	1.81077e-07	0
977	9.3131e-06	0	1.83731e-07	0
978	9.51215e-06	0	1.86429e-07	0
979	9.71446e-06	0	1.89171e-07	0
980	9.92007e-06	0	1.91958e-07	0
981	1.0129e-05	0	1.9479e-07	0
982	1.03414e-05	0	1.97668e-07	0
983	1.05571e-05	0	2.00593e-07	0
984	1.07763e-05	0	2.03564e-07	0
985	1.0999e-05	0	2.06583e-07	0
986	1.12252e-05	0	2.0965e-07	0
987	1.14549e-05	0	2.12765e-07	0
988	1.16883e-05	0	2.15928e-07	0
989	1.19253e-05	0	2.19141e-07	0
990	1.21659e-05	0	2.22404e-07	0
991	1.24103e-05	0	2.25717e-07	0
992	1.26584e-05	0	2.29081e-07	0
993	1.29104e-05	0	2.32496e-07	0
994	1.31662e-05	0	2.35962e-07	0
995	1.34258e-05	0	2.39481e-07	0
996	1.36894e-05	0	2.43052e-07	0
997	1.39569e-05	0	2.46676e-07	0
998	1.42285e-05	0	2.50353e-07	0
999	1.45042e-05	0	2.54083e-07	0
1000	1.47839e-05	0	2.57866e-07	0
1001	1.50679e-05	0	2.61703e-07	0
1002	1.5356e-05	0	2.65592e-07	0
1003	1.56485e-05	0	2.69533e-07	0
1004	1.59454e-05	0	2.73527e-07	0
1005	1.62466e-05	0	2.7757e-07	0
1006	1.65524e-05	0	2.81662e-07	0
1007	1.68629e-05	0	2.85802e-07	0
1008	1.7178e-05	0	2.89985e-07	0
1009	1.7498e-05	0	2.9421e-07	0
1010	1.7823e-05	0	2.98471e-07	0
1011	1.81532e-05	0	3.02763e-07	0
1012	1.84887e-05	0	3.07081e-07	0
1013	1.88297e-05	0	3.11416e-07	0
1014	1.91765e-05	0	3.1576e-07	0
1015	1.95295e-05	0	3.20099e-07	0
1016	1.98888e-05	0	3.24423e-07	0
1017	2.0255e-05	0	3.28714e-07	0
1018	2.06285e-05	0	3.32954e-07	0
1019	2.10097e-05	0	3.37122e-07	0
1020	2.13992e-05	0	3.41193e-07	0
1021	2.17978e-05	0	3.4514e-07	0
1022	2.22061e-05	0	3.48929e-07	0
1023	2.26249e-05	0	3.52524e-07	0
1024	2.30553e-05	0	3.55885e-07	0
1025	2.34983e-05	0	3.58966e-07	0
1026	2.3955e-05	0	3.61716e-07	0
1027	2.44035e-05	0	3.35381e-07	9.24767e-08
1028	2.4823e-05	0	2.52302e-07	3.66366e-07
1029	2.52485e-05	0	1.53867e-07	6.88087e-07
1030	2.568e-05	0	3.81771e-08	1.06353e-06
1031	2.61135e-05	0	0	1.48815e-06
1032	2.65508e-05	0	0	1.97276e-06
1033	2.69938e-05	0	0	2.52834e-06
1034	2.74427e-05	0	0	3.16185e-06
1035	2.78978e-05	0	0	3.88048e-06
1036	2.83593e-05	0	0	4.6915e-06
1037	2.88279e-05	0	0	5.60225e-06
1038	2.9304e-05	0	0	6.62e-06
1039	2.97884e-05	0	0	7.75186e-06
1040	3.02822e-05	0	0	9.00471e-06
1041	3.07867e-05	0	0	1.0385e-05
1042	3.13034e-05	0	0	1.18988e-05
1043	3.18343e-05	0	0	1.35514e-05
1044	3.2382e-05	0	0	1.53475e-05
1045	3.29496e-05	0	0	1.7291e-05
1046	3.35408e-05	0	0	1.93848e-05
1047	3.416e-05	0	0	2.16309e-05
1048	3.48125e-05	0	0	2.40302e-05
1049	3.55046e-05	0	0	2.65825e-05
1050	3.62432e-05	0	0	2.92864e-05
1051	3.70363e-05	0	0	3.21396e-05
1052	3.7893e-05	0	0	3.51385e-05
1053	3.8823e-05	0	0	3.82785e-05
1054	3.98366e-05	0	0	4.15541e-05
1055	4.09448e-05	0	0	4.4959e-05
1056	4.21587e-05	0	0	4.84861e-05
1057	4.34894e-05	0	0	5.21278e-05
1058	4.49471e-05	0	0	5.5876e-05
1059	4.65413e-05	0	0	5.97226e-05
1060	4.82796e-05	0	0	6.36592e-05
1061	5.01676e-05	0	0	6.76778e-05
1062	5.22079e-05	0	0	7.17707e-05
1063	5.44001e-05	0	0	7.59307e-05
1064	5.67397e-05	0	0	8.01511e-05
1065	5.92181e-05	0	0	8.44263e-05
1066	6.18223e-05	0	0	8.87514e-05
1067	6.45345e-05	0	0	9.31222e-05
1068	6.73329e-05	0	0	9.75356e-05
1069	7.01912e-05	0	0	0.000101989
1070	7.30799e-05	0	0	0.000106482
1071	7.59666e-05	0	0	0.000111012
1072	7.88175e-05	0	0	0.000115579
1073	8.1598e-05	0	0	0.000120182
1074	8.42746e-05	0	0	0.000124821
1075	8.68158e-05	0	0	0.000129494
1076	8.9194e-05	0	0	0.000134199
1077	9.13862e-05	0	0	0.000138933
1078	9.33758e-05	0	0	0.000143691
1079	9.51532e-05	0	0	0.000148467
1080	9.67167e-05	0	0	0.000153254
1081	9.80726e-05	0	0	0.00015804
1082	9.92357e-05	0	0	0.000162813
1083	0.000100229	0	0	0.000167558
1084	0.000101082	0	0	0.000172259
1085	0.000101831	0	0	0.000176896
1086	0.000102518	0	0	0.000181448
1087	0.000103188	0	0	0.000185892
1088	0.000103887	0	0	0.000190203
1089	0.000104662	0	0	0.000194355
1090	0.000105558	0	0	0.000198323
1091	0.000106617	0	0	0.000202079
1092	0.000107873	0	0	0.000205596
1093	0.000109357	0	0	0.00020885
1094	0.000111088	0	0	0.000211816
1095	0.000113078	0	0	0.000214471
1096	0.000115329	0	0	0.000216795
1097	0.000117831	0	0	0.000218769
1098	0.000120567	0	0	0.00022038
1099	0.000123508	0	0	0.000221615
1100	0.000126615	0	0	0.000222467
1101	0.000129844	0	0	0.000222933
1102	0.000133143	0	0	0.000223012
1103	0.000136455	0	0	0.00022271
1104	0.00013972	0	0	0.000222035
1105	0.000142879	0	0	0.000220999
1106	0.00014587	0	0	0.000219621
1107	0.000148638	0	0	0.000217919
1108	0.00015113	0	0	0.000215919
1109	0.0001533	0	0	0.000213647
1110	0.00015511	0	0	0.000211134
1111	0.000156532	0	0	0.000208414
1112	0.000157544	0	0	0.000205519
1113	0.000158138	0	0	0.000202489
1114	0.000158313	0	0	0.000199359
1115	0.000158081	0	0	0.00019617
1116	0.00015746	0	0	0.000192961
1117	0.000156478	0	0	0.000189769
1118	0.00015517	0	0	0.000186635
1119	0.000153575	0	0	0.000183594
1120	0.000151739	0	0	0.000180683
1121	0.000149707	0	0	0.000177935
1122	0.000147527	0	0	0.000175381
1123	0.000145247	0	0	0.00017305
1124	0.000142909	0	0	0.000170965
1125	0.000140555	0	0	0.000169148
1126	0.000138221	0	0	0.000167615
1127	0.000135938	0	0	0.000166378
1128	0.000133729	0	0	0.000165444
1129	0.000131613	0	0	0.000164815
1130	0.000129601	0	0	0.000164489
1131	0.000127699	0	0	0.000164457
1132	0.000125907	0	0	0.000164705
1133	0.000124221	0	0	0.000165215
1134	0.000122631	0	0	0.000165964
1135	0.000121126	0	0	0.000166924
1136	0.00011969	0	0	0.000168061
1137	0.000118309	0	0	0.000169342
1138	0.000116966	0	0	0.000170725
1139	0.000115645	0	0	0.000172172
1140	0.000114331	0	0	0.000173637
1141	0.000113012	0	0	0.000175078
1142	0.000111675	0	0	0.00017645
1143	0.000110311	0	0	0.00017771
1144	0.000108914	0	0	0.000178817
1145	0.000107477	0	0	0.000179732
1146	0.000105999	0	0	0.000180418
1147	0.000104478	0	0	0.000180844
1148	0.000102916	0	0	0.000180981
1149	0.000101316	0	0	0.000180808
1150	9.96812e-05	0	0	0.000180308
1151	9.80169e-05	0	0	0.000179469
1152	9.63288e-05	0	0	0.000178287
1153	9.4623e-05	0	0	0.000176761
1154	9.29058e-05	0	0	0.000174899
1155	9.11837e-05	0	0	0.000172713
1156	8.94629e-05	0	0	0.000170222
1157	8.77496e-05	0	0	0.000167448
1158	8.60492e-05	0	0	0.000164417
1159	8.43671e-05	0	0	0.000161163
1160	8.2708e-05	0	0	0.000157718
1161	8.10762e-05	0	0	0.000154119
1162	7.94752e-05	0	0	0.000150404
1163	7.79083e-05	0	0	0.000146613
1164	7.63782e-05	0	0	0.000142785
1165	7.4887e-05	0	0	0.000138957
1166	7.34365e-05	0	0	0.000135166
1167	7.20279e-05	0	0	0.000131448
1168	7.06622e-05	0	0	0.000127833
1169	6.934e-05	0	0	0.000124352
1170	6.80615e-05	0	0	0.000121028
1171	6.68268e-05	0	0	0.000117884
1172	6.56355e-05	0	0	0.000114934
1173	6.44871e-05	0	0	0.000112193
1174	6.33811e-05	0	0	0.000109668
1175	6.23165e-05	0	0	0.000107361
1176	6.12926e-05	0	0	0.000105273
1177	6.03081e-05	0	0	0.000103399
1178	5.9362e-05	0	0	0.000101729
1179	5.84531e-05	0	0	0.000100253
1180	5.75802e-05	0	0	9.89537e-05
1181	5.67421e-05	0	0	9.7815e-05
1182	5.59375e-05	0	0	9.68166e-05
1183	5.51652e-05	0	0	9.59373e-05
1184	5.4424e-05	0	0	9.51546e-05
1185	5.37128e-05	0	0	9.44454e-05
1186	5.30305e-05	0	0	9.37863e-05
1187	5.23761e-05	0	0	9.31543e-05
1188	5.17486e-05	0	0	9.25272e-05
1189	5.11472e-05	0	0	9.18835e-05
1190	5.0571e-05	0	0	9.12034e-05
1191	5.00193e-05	0	0	9.04688e-05
1192	4.94916e-05	0	0	8.96633e-05
1193	4.89871e-05	0	0	8.87727e-05
1194	4.85055e-05	0	0	8.77851e-05
1195	4.80462e-05	0	0	8.66907e-05
1196	4.76088e-05	0	0	8.54824e-05
1197	4.71931e-05	0	0	8.41551e-05
1198	4.67986e-05	0	0	8.27062e-05
1199	4.64252e-05	0	0	8.11353e-05
1200	4.60724e-05	0	0	7.94441e-05
1201	4.574e-05	0	0	7.76363e-05
1202	4.54276e-05	0	0	7.57174e-05
1203	4.5135e-05	0	0	7.36944e-05
1204	4.48618e-05	0	0	7.15761e-05
1205	4.46075e-05	0	0	6.93723e-05
1206	4.43716e-05	0	0	6.70938e-05
1207	4.41535e-05	0	0	6.47526e-05
1208	4.39527e-05	0	0	6.23612e-05
1209	4.37683e-05	0	0	5.99324e-05
1210	4.35996e-05	0	0	5.74797e-05
1211	4.34456e-05	0	0	5.50166e-05
1212	4.33054e-05	0	0	5.25566e-05
1213	4.31778e-05	0	0	5.0113e-05
1214	4.30616e-05	0	0	4.76989e-05
1215	4.29554e-05	0	0	4.53272e-05
1216	4.2858e-05	0	0	4.301e-05
1217	4.27678e-05	0	0	4.07592e-05
1218	4.26833e-05	0	0	3.85858e-05
1219	4.26029e-05	0	0	3.65001e-05
1220	4.25248e-05	0	0	3.45119e-05
1221	4.24474e-05	0	0	3.26298e-05
1222	4.2369e-05	0	0	3.08619e-05
1223	4.22877e-05	0	0	2.92152e-05
1224	4.22019e-05	0	0	2.76958e-05
1225	4.21097e-05	0	0	2.63089e-05
1226	4.20096e-05	0	0	2.50588e-05
1227	4.18997e-05	0	0	2.39486e-05
1228	4.17786e-05	0	0	2.29807e-05
1229	4.16448e-05	0	0	2.21562e-05
1230	4.14969e-05	0	0	2.14754e-05
1231	4.13336e-05	0	0	2.09376e-05
1232	4.11538e-05	0	0	2.05409e-05
1233	4.09564e-05	0	0	2.02826e-05
1234	4.07408e-05	0	0	2.01588e-05
1235	4.05062e-05	0	0	2.01649e-05
1236	4.02522e-05	0	0	2.02952e-05
1237	3.99785e-05	0	0	2.0543e-05
1238	3.9685e-05	0	0	2.09008e-05
1239	3.9372e-05	0	0	2.13604e-05
1240	3.90398e-05	0	0	2.19127e-05
1241	3.86889e-05	0	0	2.25477e-05
1242	3.83201e-05	0	0	2.32551e-05
1243	3.79345e-05	0	0	2.40238e-05
1244	3.75332e-05	0	0	2.48424e-05
1245	3.71177e-05	0	0	2.5699e-05
1246	3.66894e-05	0	0	2.65814e-05
1247	3.62502e-05	0	0	2.74773e-05
1248	3.5802e-05	0	0	2.83744e-05
1249	3.53469e-05	0	0	2.92606e-05
1250	3.4887e-05	0	0	3.01236e-05
1251	3.44246e-05	0	0	3.09519e-05
1252	3.39622e-05	0	0	3.17342e-05
1253	3.35022e-05	0	0	3.24599e-05
1254	3.30472e-05	0	0	3.31189e-05
1255	3.25997e-05	0	0	3.37022e-05
1256	3.21623e-05	0	0	3.42015e-05
1257	3.17374e-05	0	0	3.46096e-05
1258	3.13277e-05	0	0	3.49203e-05
1259	3.09355e-05	0	0	3.51287e-05
1260	3.05632e-05	0	0	3.52308e-05
1261	3.0213e-05	0	0	3.52242e-05
1262	2.9887e-05	0	0	3.51074e-05
1263	2.95872e-05	0	0	3.48802e-05
1264	2.93153e-05	0	0	3.45439e-05
1265	2.9073e-05	0	0	3.41006e-05
1266	2.88616e-05	0	0	3.35536e-05
1267	2.86823e-05	0	0	3.29075e-05
1268	2.85359e-05	0	0	3.21675e-05
1269	2.84233e-05	0	0	3.134e-05
1270	2.83447e-05	0	0	3.0432e-05
1271	2.83005e-05	0	0	2.94512e-05
1272	2.82904e-05	0	0	2.84058e-05
1273	2.83143e-05	0	0	2.73044e-05
1274	2.83715e-05	0	0	2.61562e-05
1275	2.84611e-05	0	0	2.49701e-05
1276	2.85822e-05	0	0	2.37556e-05
1277	2.87335e-05	0	0	2.25216e-05
1278	2.89137e-05	0	0	2.12773e-05
1279	2.9121e-05	0	0	2.00316e-05
1280	2.93539e-05	0	0	1.87929e-05
1281	2.96104e-05	0	0	1.75693e-05
1282	2.98888e-05	0	0	1.63686e-05
1283	3.01873e-05	0	0	1.5198e-05
1284	3.0504e-05	0	0	1.40641e-05
1285	3.08372e-05	0	0	1.29731e-05
1286	3.11854e-05	0	0	1.19307e-05
1287	3.15472e-05	0	0	1.0942e-05
1288	3.19216e-05	0	0	1.00115e-05
1289	3.23079e-05	0	0	9.14347e-06
1290	3.27057e-05	0	0	8.34154e-06
1291	3.31151e-05	0	0	7.60905e-06
1292	3.35367e-05	0	0	6.94897e-06
1293	3.39715e-05	0	0	6.36404e-06
1294	3.44213e-05	0	0	5.85679e-06
1295	3.48882e-05	0	0	5.42963e-06
1296	3.5375e-05	0	0	5.08491e-06
1297	3.58848e-05	0	0	4.82502e-06
1298	3.64215e-05	0	0	4.65243e-06
1299	3.69892e-05	0	0	4.56981e-06
1300	3.75923e-05	0	0	4.58007e-06
1301	3.82355e-05	0	0	4.68643e-06
1302	3.89232e-05	0	0	4.89251e-06
1303	3.966e-05	0	0	5.20237e-06
1304	4.04499e-05	0	0	5.62056e-06
1305	4.12966e-05	0	0	6.15222e-06
1306	4.22029e-05	0	0	6.80304e-06
1307	4.31705e-05	0	0	7.57937e-06
1308	4.42e-05	0	0	8.4882e-06
1309	4.52907e-05	0	0	9.53719e-06
1310	4.64402e-05	0	0	1.07347e-05
1311	4.76445e-05	0	0	1.20896e-05
1312	4.88978e-05	0	0	1.36116e-05
1313	5.01925e-05	0	0	1.5311e-05
1314	5.15194e-05	0	0	1.71985e-05
1315	5.28673e-05	0	0	1.92853e-05
1316	5.42238e-05	0	0	2.15832e-05
1317	5.55752e-05	0	0	2.41041e-05
1318	5.69068e-05	0	0	2.68603e-05
1319	5.82034e-05	0	0	2.98641e-05
1320	5.94495e-05	0	0	3.31276e-05
1321	6.06299e-05	0	0	3.66631e-05
1322	6.17304e-05	0	0	4.04822e-05
1323	6.27375e-05	0	0	4.45963e-05
1324	6.36398e-05	0	0	4.90159e-05
1325	6.44279e-05	0	0	5.37508e-05
1326	6.50947e-05	0	0	5.88098e-05
1327	6.56362e-05	0	0	6.42005e-05
1328	6.6051e-05	0	0	6.99293e-05
1329	6.63414e-05	0	0	7.6001e-05
1330	6.65126e-05	0	0	8.24188e-05
1331	6.65732e-05	0	0	8.91843e-05
1332	6.65349e-05	0	0	9.62968e-05
1333	6.64124e-05	0	0	0.000103754
1334	6.62231e-05	0	0	0.000111552
1335	6.59868e-05	0	0	0.000119682
1336	6.57251e-05	0	0	0.000128138
1337	6.54614e-05	0	0	0.000136907
1338	6.522e-05	0	0	0.000145975
1339	6.50261e-05	0	0	0.000155328
1340	6.49051e-05	0	0	0.000164946
1341	6.48823e-05	0	0	0.00017481
1342	6.49823e-05	0	0	0.000184897
1343	6.52289e-05	0	0	0.000195183
1344	6.56448e-05	0	0	0.000205641
1345	6.62511e-05	0	0	0.000216243
1346	6.70671e-05	0	0	0.00022696
1347	6.81104e-05	0	0	0.000237758
1348	6.93963e-05	0	0	0.000248608
1349	7.0938e-05	0	0	0.000259473
1350	7.27461e-05	0	0	0.000270321
1351	7.48291e-05	0	0	0.000281116
1352	7.71927e-05	0	0	0.000291823
1353	7.98403e-05	0	0	0.000302407
1354	8.27727e-05	0	0	0.000312833
1355	8.59881e-05	0	0	0.000323067
1356	8.94822e-05	0	0	0.000333074
1357	9.32485e-05	0	0	0.000342823
1358	9.72783e-05	0	0	0.000352282
1359	0.000101561	0	0	0.000361423
1360	0.000106084	0	0	0.000370216
1361	0.000110834	0	0	0.000378638
1362	0.000115798	0	0	0.000386663
1363	0.000120961	0	0	0.000394271
1364	0.000126313	0	0	0.000401444
1365	0.000131845	0	0	0.000408164
1366	0.000137555	0	0	0.000414418
1367	0.00014345	0	0	0.000420193
1368	0.000149552	0	0	0.000425481
1369	0.000155899	0	0	0.000430272
1370	0.000162553	0	0	0.000434562
1371	0.000169599	0	0	0.000438343
1372	0.00017715	0	0	0.000441614
1373	0.000185336	0	0	0.00044437
1374	0.000194299	0	0	0.000446613
1375	0.000204166	0	0	0.000448345
1376	0.00021503	0	0	0.000449574
1377	0.000226917	0	0	0.000450312
1378	0.000239755	0	0	0.000450583
1379	0.000253355	0	0	0.000450417
1380	0.000267407	0	0	0.000449852
1381	0.00028149	0	0	0.000448937
1382	0.000295115	0	0	0.000447726
1383	0.000307777	0	0	0.000446273
1384	0.000319028	0	0	0.000444632
1385	0.000328539	0	0	0.000442851
1386	0.000336153	0	0	0.000440967
1387	0.000341913	0	0	0.000439008
1388	0.000346051	0	0	0.000436989
1389	0.000348953	0	0	0.000434919
1390	0.000351104	0	0	0.000432799
1391	0.000353017	0	0	0.000430631
1392	0.000355165	0	0	0.000428418
1393	0.000357939	0	0	0.000426167
1394	0.000361609	0	0	0.000423894
1395	0.000366328	0	0	0.00042162
1396	0.000372137	0	0	0.000419374
1397	0.000378991	0	0	0.000417188
1398	0.000386792	0	0	0.000415098
1399	0.000395416	0	0	0.000413138
1400	0.000404734	0	0	0.000411344
1401	0.000414634	0	0	0.000409748
1402	0.000425021	0	0	0.00040838
1403	0.000435829	0	0	0.000407267
1404	0.000447013	0	0	0.000406432
1405	0.000458546	0	0	0.000405897
1406	0.000470418	0	0	0.000405676
1407	0.00048263	0	0	0.000405785
1408	0.00049519	0	0	0.000406233
1409	0.00050811	0	0	0.000407028
1410	0.000521405	0	0	0.000408173
1411	0.000535092	0	0	0.000409668
1412	0.000549188	0	0	0.000411511
1413	0.00056371	0	0	0.000413694
1414	0.000578675	0	0	0.000416206
1415	0.000594097	0	0	0.000419031
1416	0.00060999	0	0	0.000422153
1417	0.000626362	0	0	0.000425548
1418	0.000643219	0	0	0.00042919
1419	0.000660561	0	0	0.000433051
1420	0.00067838	0	0	0.000437097
1421	0.000696659	0	0	0.000441293
1422	0.000715371	0	0	0.000445603
1423	0.000734476	0	0	0.000449986
1424	0.000753919	0	0	0.000454401
1425	0.000773629	0	0	0.000458808
1426	0.00079352	0	0	0.000463162
1427	0.000813487	0	0	0.000467423
1428	0.000833409	0	0	0.000471549
1429	0.000853156	0	0	0.000475501
1430	0.000872587	0	0	0.000479239
1431	0.000891567	0	0	0.000482727
1432	0.000909977	0	0	0.00048593
1433	0.00092773	0	0	0.000488813
1434	0.000944788	0	0	0.000491344
1435	0.00096118	0	0	0.00049349
1436	0.000976995	0	0	0.00049522
1437	0.00099237	0	0	0.000496505
1438	0.00100744	0	0	0.000497323
1439	0.00102227	0	0	0.000497661
1440	0.00103676	0	0	0.000497524
1441	0.0010506	0	0	0.000496935
1442	0.00106319	0	0	0.000495938
1443	0.00107367	0	0	0.0004946
1444	0.0010811	0	0	0.000492997
1445	0.00108452	0	0	0.000491208
1446	0.00108326	0	0	0.000489299
1447	0.00107704	0	0	0.000487314
1448	0.00106608	0	0	0.000485265
1449	0.00105111	0	0	0.000483133
1450	0.00103318	0	0	0.000480877
1451	0.0010135	0	0	0.000478441
1452	0.000993225	0	0	0.000475766
1453	0.000973274	0	0	0.0004728
1454	0.000954235	0	0	0.000469505
1455	0.000936357	0	0	0.000465853
1456	0.000919601	0	0	0.000461828
1457	0.000903723	0	0	0.00045742
1458	0.000888371	0	0	0.000452619
1459	0.000873162	0	0	0.000447417
1460	0.000857734	0	0	0.000441799
1461	0.000841776	0	0	0.000435754
1462	0.00082504	0	0	0.000429266
1463	0.000807341	0	0	0.000422326
1464	0.000788555	0	0	0.000414925
1465	0.000768614	0	0	0.000407065
1466	0.000747504	0	0	0.000398753
1467	0.000725263	0	0	0.000390005
1468	0.000701975	0	0	0.000380847
1469	0.000677768	0	0	0.000371312
1470	0.00065281	0	0	0.000361442
1471	0.0006273	0	0	0.000351285
1472	0.000601459	0	0	0.000340893
1473	0.000575523	0	0	0.000330322
1474	0.000549732	0	0	0.000319628
1475	0.000524322	0	0	0.000308869
1476	0.000499514	0	0	0.000298099
1477	0.000475511	0	0	0.00028737
1478	0.000452488	0	0	0.000276728
1479	0.000430592	0	0	0.000266215
1480	0.000409941	0	0	0.000255869
1481	0.000390626	0	0	0.000245723
1482	0.000372712	0	0	0.000235802
1483	0.000356244	0	0	0.000226133
1484	0.000341256	0	0	0.000216737
1485	0.000327774	0	0	0.000207632
1486	0.000315826	0	0	0.000198841
1487	0.000305447	0	0	0.000190382
1488	0.000296684	0	0	0.000182277
1489	0.000289598	0	0	0.000174551
1490	0.000284265	0	0	0.000167227
1491	0.00028077	0	0	0.000160333
1492	0.000279202	0	0	0.000153893
1493	0.000279641	0	0	0.000147932
1494	0.000282144	0	0	0.000142467
1495	0.000286729	0	0	0.00013751
1496	0.000293358	0	0	0.000133061
1497	0.000301918	0	0	0.000129107
1498	0.000312209	0	0	0.00012562
1499	0.000323934	0	0	0.000122554
1500	0.000336697	0	0	0.000119845
1501	0.000350008	0	0	0.000117413
1502	0.000363297	0	0	0.000115164
1503	0.000375937	0	0	0.000112992
1504	0.000387279	0	0	0.000110789
1505	0.00039668	0	0	0.000108445
1506	0.000403553	0	0	0.000105861
1507	0.000407395	0	0	0.000102949
1508	0.000407829	0	0	9.96459e-05
1509	0.000404628	0	0	9.59095e-05
1510	0.000397732	0	0	9.17272e-05
1511	0.00038725	0	0	8.71146e-05
1512	0.000373456	0	0	8.21145e-05
1513	0.000356765	0	0	7.67937e-05
1514	0.000337708	0	0	7.12376e-05
1515	0.000316891	0	0	6.55446e-05
1516	0.00029496	0	0	5.98193e-05
1517	0.000272556	0	0	5.41654e-05
1518	0.000250285	0	0	4.86805e-05
1519	0.000228684	0	0	4.345e-05
1520	0.0002082	0	0	3.85443e-05
1521	0.000189179	0	0	3.40165e-05
1522	0.00017186	0	0	2.99011e-05
1523	0.000156378	0	0	2.62155e-05
1524	0.000142776	0	0	2.29611e-05
1525	0.000131016	0	0	2.01259e-05
1526	0.000121001	0	0	1.76875e-05
1527	0.000112588	0	0	1.56161e-05
1528	0.000105608	0	0	1.38773e-05
1529	9.98776e-05	0	0	1.24346e-05
1530	9.52147e-05	0	0	1.12514e-05
1531	9.14453e-05	0	0	1.0293e-05
1532	8.8411e-05	0	0	9.52728e-06
1533	8.59726e-05	0	0	8.92546e-06
1534	8.40114e-05	0	0	8.46245e-06
1535	8.24295e-05	0	0	8.1168e-06
1536	8.11483e-05	0	0	7.87046e-06
1537	8.01062e-05	0	0	7.70843e-06
1538	7.92567e-05	0	0	7.6184e-06
1539	7.85656e-05	0	0	7.5903e-06
1540	7.80088e-05	0	0	7.61591e-06
1541	7.75701e-05	0	0	7.68847e-06
1542	7.72398e-05	0	0	7.80244e-06
1543	7.70127e-05	0	0	7.95315e-06
1544	7.68875e-05	0	0	8.1367e-06
1545	7.68656e-05	0	0	8.3497e-06
1546	7.69504e-05	0	0	8.58924e-06
1547	7.71471e-05	0	0	8.85269e-06
1548	7.74622e-05	0	0	9.13774e-06
1549	7.79032e-05	0	0	9.44226e-06
1550	7.84784e-05	0	0	9.7643e-06
1551	7.91971e-05	0	0	1.0102e-05
1552	8.00691e-05	0	0	1.04538e-05
1553	8.11047e-05	0	0	1.0818e-05
1554	8.23149e-05	0	0	1.11932e-05
1555	8.37109e-05	0	0	1.15778e-05
1556	8.53041e-05	0	0	1.19706e-05
1557	8.71059e-05	0	0	1.23703e-05
1558	8.91275e-05	0	0	1.27756e-05
1559	9.13797e-05	0	0	1.31855e-05
1560	9.3872e-05	0	0	1.35989e-05
1561	9.66129e-05	0	0	1.4015e-05
1562	9.96089e-05	0	0	1.4433e-05
1563	0.000102864	0	0	1.48523e-05
1564	0.000106379	0	0	1.52726e-05
1565	0.000110151	0	0	1.56938e-05
1566	0.000114172	0	0	1.61159e-05
1567	0.000118432	0	0	1.65394e-05
1568	0.000122911	0	0	1.69651e-05
1569	0.000127586	0	0	1.73942e-05
1570	0.000132428	0	0	1.78282e-05
1571	0.0001374	0	0	1.82688e-05
1572	0.000142461	0	0	1.87184e-05
1573	0.000147565	0	0	1.91795e-05
1574	0.00015266	0	0	1.96548e-05
1575	0.000157692	0	0	2.01473e-05
1576	0.000162604	0	0	2.06601e-05
1577	0.00016734	0	0	2.11963e-05
1578	0.000171845	0	0	2.1759e-05
1579	0.000176067	0	0	2.23509e-05
1580	0.000179958	0	0	2.29747e-05
1581	0.000183478	0	0	2.36325e-05
1582	0.000186595	0	0	2.4326e-05
1583	0.000189285	0	0	2.50565e-05
1584	0.000191533	0	0	2.58245e-05
1585	0.000193337	0	0	2.66302e-05
1586	0.000194702	0	0	2.7473e-05
1587	0.000195643	0	0	2.83518e-05
1588	0.000196185	0	0	2.92652e-05
1589	0.000196358	0	0	3.02112e-05
1590	0.000196199	0	0	3.11876e-05
1591	0.00019575	0	0	3.21919e-05
1592	0.000195054	0	0	3.32217e-05
1593	0.000194154	0	0	3.42743e-05
1594	0.000193093	0	0	3.53474e-05
1595	0.000191914	0	0	3.64388e-05
1596	0.000190652	0	0	3.75464e-05
1597	0.000189343	0	0	3.86686e-05
1598	0.000188014	0	0	3.98041e-05
1599	0.000186689	0	0	4.09519e-05
1600	0.00018539	0	0	4.21117e-05
1601	0.00018413	0	0	4.32833e-05
1602	0.000182922	0	0	4.4467e-05
1603	0.000181776	0	0	4.56638e-05
1604	0.0001807	0	0	4.68751e-05
1605	0.000179706	0	0	4.81031e-05
1606	0.000178806	0	0	4.93509e-05
1607	0.00017802	0	0	5.0623e-05
1608	0.000177378	0	0	5.19257e-05
1609	0.000176923	0	0	5.32676e-05
1610	0.000176722	0	0	5.4661e-05
1611	0.000176863	0	0	5.61224e-05
1612	0.000177472	0	0	5.76735e-05
1613	0.000178712	0	0	5.93431e-05
1614	0.000180791	0	0	6.11673e-05
1615	0.000183965	0	0	6.31901e-05
1616	0.000188536	0	0	6.54634e-05
1617	0.000194843	0	0	6.80455e-05
1618	0.000203246	0	0	7.09985e-05
1619	0.000214098	0	0	7.43839e-05
1620	0.000227716	0	0	7.8257e-05
1621	0.000244331	0	0	8.26596e-05
1622	0.000264045	0	0	8.76118e-05
1623	0.000286785	0	0	9.31049e-05
1624	0.000312259	0	0	9.90937e-05
1625	0.000339935	0	0	0.000105493
1626	0.000369037	0	0	0.000112177
1627	0.000398565	0	0	0.000118983
1628	0.000427352	0	0	0.000125718
1629	0.000454137	0	0	0.000132176
1630	0.000477669	0	0	0.000138152
1631	0.000496812	0	0	0.000143459
1632	0.000510657	0	0	0.000147948
1633	0.000518609	0	0	0.000151523
1634	0.000520448	0	0	0.000154149
1635	0.00051636	0	0	0.000155859
1636	0.000506917	0	0	0.000156749
1637	0.000493024	0	0	0.00015697
1638	0.000475838	0	0	0.000156713
1639	0.000456656	0	0	0.000156193
1640	0.000436809	0	0	0.000155629
1641	0.00041757	6.37943e-07	0	0.00015518
1642	0.000400037	1.89168e-06	0	0.000155027
1643	0.000385076	2.99598e-06	0	0.000155377
1644	0.000373313	3.91848e-06	0	0.000156336
1645	0.000365113	4.63513e-06	0	0.000157974
1646	0.000360602	5.12979e-06	0	0.000160321
1647	0.000359699	5.3933e-06	0	0.000163378
1648	0.000362169	5.42231e-06	0	0.000167121
1649	0.000367669	5.218e-06	0	0.000171515
1650	0.000375801	4.7849e-06	0	0.000176515
1651	0.000386156	4.13e-06	0	0.000182074
1652	0.000398348	3.26193e-06	0	0.000188148
1653	0.000412048	2.19063e-06	0	0.000194698
1654	0.000426997	9.27001e-07	0	0.000201688
1655	0.00044303	0	0	0.000209052
1656	0.000460073	0	0	0.000216721
1657	0.000478108	0	0	0.000224745
1658	0.000497219	0	0	0.000233107
1659	0.000517562	0	0	0.00024179
1660	0.000539352	0	0	0.000250776
1661	0.000562852	0	0	0.000260047
1662	0.000588346	0	0	0.000269584
1663	0.000616121	0	0	0.000279368
1664	0.000646433	0	0	0.000289382
1665	0.000679472	0	0	0.000299611
1666	0.000715327	0	0	0.000310047
1667	0.000753947	0	0	0.000320688
1668	0.000795122	0	0	0.000331544
1669	0.000838467	0	0	0.000342635
1670	0.000883439	0	0	0.00035399
1671	0.000929377	0	0	0.000365651
1672	0.000975561	0	0	0.000377665
1673	0.0010213	0	0	0.000390082
1674	0.00106599	0	0	0.000402952
1675	0.00110924	0	0	0.000416319
1676	0.00115086	0	0	0.000430223
1677	0.00119093	0	0	0.000444694
1678	0.00122976	0	0	0.000459759
1679	0.00126787	0	0	0.000475441
1680	0.00130592	0	0	0.000491762
1681	0.00134467	0	0	0.00050875
1682	0.0013849	0	0	0.000526437
1683	0.00142741	0	0	0.000544867
1684	0.00147298	0	0	0.000564092
1685	0.0015224	0	0	0.00058417
1686	0.00157643	0	0	0.00060517
1687	0.00163589	0	0	0.000627166
1688	0.00170162	0	0	0.000650238
1689	0.00177451	0	0	0.000674467
1690	0.00185548	0	0	0.000699939
1691	0.00194547	0	0	0.000726741
1692	0.00204538	0	0	0.000754963
1693	0.00215603	0	0	0.000784691
1694	0.0022781	0	0	0.000816004
1695	0.00241208	0	0	0.000848971
1696	0.00255827	0	0	0.000883636
1697	0.00271675	0	0	0.000920008
1698	0.0028875	0	0	0.000958044
1699	0.00307046	0	0	0.00099764
1700	0.00326561	0	0	0.00103861
1701	0.00347309	0	0	0.0010807
1702	0.00369313	0	0	0.00112358
1703	0.0039259	0	0	0.00116687
1704	0.00417128	0	0	0.00121019
1705	0.0044284	0	0	0.0012532
1706	0.00469529	0	0	0.00129564
1707	0.00496849	0	0	0.00133738
1708	0.00524302	0	0	0.00137847
1709	0.00551259	0	0	0.00141908
1710	0.00577019	0	0	0.00145951
1711	0.00600894	0	0	0.00150011
1712	0.00622292	0	0	0.00154122
1713	0.00640782	0	0	0.00158314
1714	0.00656116	0	0	0.00162603
1715	0.00668205	0	0	0.00166999
1716	0.0067706	0	0	0.001715
1717	0.00682729	0	0	0.00176102
1718	0.00685254	0	0	0.00180798
1719	0.00684663	0	0	0.00185581
1720	0.00680993	0	0	0.00190442
1721	0.00674336	0	0	0.00195375
1722	0.00664864	0	0	0.00200368
1723	0.00652835	0	0	0.00205412
1724	0.00638564	0	0	0.00210501
1725	0.00622379	0	0	0.00215634
1726	0.00604582	0	0	0.00220818
1727	0.00585436	0	0	0.0022607
1728	0.0056517	0	0	0.00231412
1729	0.00543998	0	0	0.00236873
1730	0.00522138	0	0	0.0024248
1731	0.00499814	0	0	0.00248265
1732	0.00477247	0	0	0.00254258
1733	0.00454552	0	1.82592e-05	0.00260286
1734	0.00431762	0	8.37594e-05	0.00266054
1735	0.00409184	0	0.00015469	0.00272063
1736	0.00386914	0	0.000231251	0.00278339
1737	0.00365037	0	0.000313662	0.00284907
1738	0.00343648	0	0.000402172	0.00291786
1739	0.00322854	0	0.000497062	0.00298993
1740	0.00302782	0	0.00059864	0.00306537
1741	0.00283563	0	0.000707242	0.00314421
1742	0.00265331	0	0.000823227	0.00322646
1743	0.00248209	0	0.000946975	0.00331205
1744	0.00232307	0	0.00107888	0.0034009
1745	0.00217709	0	0.00121936	0.00349286
1746	0.00204456	0	0.00136883	0.00358777
1747	0.00192513	0	0.00152771	0.00368546
1748	0.00181744	0	0.00169643	0.00378575
1749	0.00171887	0	0.0018754	0.00388852
1750	0.00162571	0	0.00206505	0.00399363
1751	0.00153371	0	0.00226585	0.00410095
1752	0.00143906	0	0.00247837	0.00421026
1753	0.00133955	0	0.00270331	0.00432121
1754	0.00123516	0	0.00294159	0.00443325
1755	0.00112776	0	0.00319434	0.00454567
1756	0.00101964	0	0.00346289	0.0046577
1757	0.000911655	0	0.00374878	0.00476863
1758	0.000802304	0	0.00405373	0.00487786
1759	0.000688776	0	0.00437979	0.00498483
1760	0.000569397	0	0.00472948	0.00508887
1761	0.000445806	0	0.00510595	0.00518908
1762	0.000323122	0	0.00551317	0.00528426
1763	0.000208005	0	0.00595609	0.00537304
1764	0.000106113	0	0.00644084	0.00545402
1765	2.06233e-05	0	0.00697532	0.00552578
1766	0	0	0.00756892	0.00558415
1767	0	0	0.00823814	0.00562988
1768	0	0	0.00900555	0.00566202
1769	0	0	0.00990024	0.00567808
1770	0	0	0.010953	0.00567554
1771	0	0	0.0121818	0.00565239
1772	0	0	0.0135742	0.00560792
1773	0	0	0.0150803	0.00554303
1774	0	0	0.0166333	0.00545952
1775	0	0	0.0181885	0.00535848
1776	0	0	0.0197535	0.00523901
1777	0	0	0.0213775	0.0050988
1778	0	0	0.023099	0.00493744
1779	0	0	0.024883	0.00476112
1780	0	0	0.0265934	0.00458516
1781	0	0	0.0280289	0.00443065
1782	0	0	0.0290106	0.00431561
1783	0	0	0.0294631	0.00424642
1784	0	0	0.029429	0.00421651
1785	0	0	0.0290133	0.0042131
1786	0	0	0.0283104	0.00422581
1787	0	0	0.02737	0.00425072
1788	0	0	0.02621	0.00428858
1789	0	0	0.0248459	0.0043408
1790	0	0	0.02331	0.00440658
1791	0	0	0.0216517	0.00448237
1792	0	0	0.0199284	0.00456267
1793	0	0	0.0181965	0.00464119
1794	0	0	0.0165048	0.0047119
1795	0	2.52024e-05	0.0148896	0.00476818
1796	0	5.90817e-05	0.0133794	0.00480766
1797	0	8.19669e-05	0.0119922	0.00482999
1798	0	9.50083e-05	0.0107338	0.0048353
1799	0	9.96889e-05	0.00960244	0.00482521
1800	0	9.75819e-05	0.00859095	0.00480239
1801	0	9.01995e-05	0.0076893	0.00476995
1802	0	7.89182e-05	0.00688638	0.00473091
1803	0	6.49499e-05	0.00617135	0.00468784
1804	0	4.93354e-05	0.00553427	0.00464264
1805	0	3.29439e-05	0.00496634	0.00459653
1806	0	1.6475e-05	0.00445988	0.00455015
1807	0	4.63311e-07	0.00400816	0.00450378
1808	1.23625e-05	0	0.0036034	0.00445583
1809	3.67399e-05	0	0.00324178	0.00440731
1810	5.63762e-05	0	0.002919	0.00435922
1811	6.95983e-05	0	0.00263075	0.00431175
1812	7.55398e-05	0	0.00237316	0.00426509
1813	7.4083e-05	0	0.00214279	0.00421946
1814	6.57288e-05	0	0.00193659	0.00417504
1815	5.14304e-05	0	0.00175193	0.00413201
1816	3.24187e-05	0	0.00158651	0.00409051
1817	1.00461e-05	0	0.00143836	0.00405065
1818	0	0	0.0013054	0.00401165
1819	0	0	0.00118631	0.00397373
1820	0	0	0.00108017	0.00393744
1821	0	0	0.00098596	0.00390276
1822	0	0	0.000902822	0.00386957
1823	0	0	0.000830031	0.00383773
1824	0	0	0.000766994	0.00380706
1825	0	0	0.000713252	0.00377736
1826	0	0	0.000668504	0.00374838
1827	0	0	0.000632644	0.00371988
1828	0	0	0.000605809	0.00369159
1829	0	0	0.000588458	0.00366321
1830	0	0	0.000581442	0.00363444
1831	0	0	0.000586077	0.00360491
1832	0	0	0.000604175	0.00357424
1833	0	0	0.000638009	0.00354201
1834	0	0	0.000690168	0.00350778
1835	0	0	0.000763267	0.00347114
1836	0	0	0.000859517	0.00343173
1837	0	0	0.000980158	0.00338933
1838	0	0	0.00112486	0.0033439
1839	0	0	0.00129118	0.00329567
1840	0	0	0.00147425	0.00324516
1841	0	0	0.00166684	0.00319317
1842	0	0	0.00185982	0.00314074
1843	0	0	0.00204319	0.00308902
1844	0	0	0.00220736	0.00303912
1845	0	0	0.00234466	0.00299198
1846	0	0	0.00245064	0.00294818
1847	0	0	0.00252491	0.00290786
1848	0	0	0.0025711	0.00287073
1849	0	0	0.00259599	0.0028361
1850	0	0	0.0026078	0.00280304
1851	0	0	0.00261403	0.00277056
1852	0	0	0.00261948	0.00273779
1853	0	0	0.00262496	0.00270409
1854	0	0	0.00262712	0.00266913
1855	0	0	0.00261962	0.00263284
1856	0	0	0.00259516	0.00259539
1857	0	0	0.00254796	0.00255702
1858	0	0	0.0024756	0.00251798
1859	0	0	0.00237986	0.00247845
1860	0	0	0.00226622	0.00243856
1861	0	0	0.00214227	0.00239833
1862	0	0	0.00201573	0.00235782
1863	0	0	0.00189268	0.0023171
1864	0	0	0.00177657	0.0022763
1865	0	0	0.00166804	0.0022356
1866	0	0	0.00156547	0.00219522
1867	0	0	0.00146597	0.00215541
1868	0	0	0.00136636	0.00211634
1869	0	0	0.00126406	0.00207816
1870	0	0	0.00115755	0.00204094
1871	0	0	0.00104666	0.00200466
1872	0	0	0.000932506	0.00196925
1873	0	0	0.000817209	0.00193457
1874	0	0	0.000703521	0.00190044
1875	0	0	0.000594375	0.00186667
1876	0	0	0.000492479	0.00183307
1877	0	0	0.000399986	0.00179945
1878	5.97925e-06	0	0.000318139	0.00176531
1879	3.12507e-05	0	0.000247178	0.00172979
1880	5.04931e-05	0	0.000187679	0.00169421
1881	6.35585e-05	0	0.000138934	0.00165854
1882	7.08002e-05	0	9.98229e-05	0.00162273
1883	7.2928e-05	0	6.90014e-05	0.00158675
1884	7.08244e-05	0	4.5069e-05	0.00155059
1885	6.53739e-05	0	2.66878e-05	0.00151428
1886	5.73464e-05	0	1.2658e-05	0.00147787
1887	4.73511e-05	0	1.95369e-06	0.00144144
1888	3.55717e-05	0	0	0.00140438
1889	2.26504e-05	0	0	0.00136752
1890	8.98724e-06	0	0	0.00133112
1891	0	0	0	0.00129496
1892	0	0	0	0.00125887
1893	0	0	0	0.00122349
1894	0	0	0	0.00118887
1895	0	0	0	0.0011551
1896	0	0	0	0.0011222
1897	0	0	0	0.0010902
1898	0	0	0	0.00105911
1899	0	0	0	0.00102892
1900	0	0	0	0.000999604
1901	0	0	0	0.000971131
1902	0	0	0	0.000943464
1903	0	0	0	0.000916561
1904	0	0	0	0.00089038
1905	0	0	0	0.000864879
1906	0	0	0	0.000840023
1907	0	0	0	0.000815776
1908	0	0	0	0.000792112
1909	0	0	0	0.000769007
1910	0	0	0	0.000746442
1911	0	0	0	0.000724402
1912	0	0	0	0.000702879
1913	0	0	0	0.000681863
1914	0	0	0	0.000661351
1915	0	0	0	0.000641339
1916	0	0	0	0.000621826
1917	0	0	0	0.000602811
1918	0	0	0	0.000584294
1919	0	0	0	0.000566273
1920	0	0	0	0.000548747
1921	0	0	0	0.000531716
1922	0	0	0	0.000515177
1923	0	0	0	0.000499127
1924	0	0	0	0.000483562
1925	0	0	0	0.000468477
1926	0	0	0	0.000453867
1927	0	0	0	0.000439725
1928	0	0	0	0.000426045
1929	0	0	0	0.000412816
1930	0	0	0	0.000400032
1931	0	0	0	0.000387681
1932	0	0	0	0.000375753
1933	0	0	0	0.000364238
1934	0	0	0	0.000353124
1935	0	0	0	0.000342398
1936	0	0	0	0.000332048
1937	0	0	0	0.000322062
1938	0	0	0	0.000312426
1939	0	0	0	0.000303127
1940	0	0	0	0.000294151
1941	0	0	0	0.000285485
1942	0	0	0	0.000277115
1943	0	0	0	0.000269027
1944	0	0	0	0.000261208
1945	0	0	0	0.000253643
1946	0	0	0	0.000246321
1947	0	0	0	0.000239228
1948	0	0	0	0.000232352
1949	0	0	0	0.00022568
1950	0	0	0	0.000219201
1951	0	0	0	0.000212904
1952	0	0	0	0.000206777
1953	0	0	0	0.000200813
1954	0	0	0	0.000195
1955	0	0	0	0.000189331
1956	0	0	0	0.000183799
1957	0	0	0	0.000178396
1958	0	0	0	0.000173117
1959	0	0	0	0.000167956
1960	0	0	0	0.000162908
1961	0	0	6.59966e-07	0.000157895
1962	0	0	1.44832e-06	0.000152975
1963	0	0	2.0915e-06	0.000148176
1964	0	0	2.59572e-06	0.000143496
1965	0	0	2.96803e-06	0.000138935
1966	0	0	3.21618e-06	0.000134489
1967	0	0	3.34858e-06	0.000130159
1968	0	0	3.37411e-06	0.000125944
1969	0	0	3.30205e-06	0.000121844
1970	0	0	3.14197e-06	0.000117858
1971	0	0	2.90359e-06	0.000113987
1972	0	0	2.59667e-06	0.000110232
1973	0	0	2.23094e-06	0.000106592
1974	0	0	1.81593e-06	0.000103067
1975	0	0	1.36095e-06	9.96591e-05
1976	0	0	8.74967e-07	9.63671e-05
1977	0	0	3.66544e-07	9.31912e-05
1978	0	0	0	9.01136e-05
1979	0	0	0	8.71088e-05
1980	0	0	0	8.42193e-05
1981	0	0	0	8.14449e-05
1982	0	0	0	7.87853e-05
1983	1.65863e-07	0	0	7.623e-05
1984	3.51983e-07	0	0	7.37866e-05
1985	5.24078e-07	0	0	7.14561e-05
1986	6.82325e-07	0	0	6.92369e-05
1987	8.26691e-07	0	0	6.71273e-05
1988	9.56956e-07	0	0	6.51255e-05
1989	1.07274e-06	0	0	6.32294e-05
1990	1.17351e-06	0	0	6.1437e-05
1991	1.25866e-06	0	0	5.97459e-05
1992	1.32747e-06	0	0	5.8154e-05
1993	1.37918e-06	0	0	5.6659e-05
1994	1.41298e-06	0	0	5.52587e-05
1995	1.42806e-06	0	0	5.39511e-05
[truncated: 2,005 more rows]

## Sheet: Devonian–Pennsylvanian
Mesoproterozoic–Cretaceous provenance and paleogeographic evolution of the Northern Rockies: Insights from the detrital zircon record of the Bridger Range, MT, USA
GSA Data Reposity Item 20XXxxx. Table DR3. NMF sources, source weights, and goodness of fit metrics.
Reconstructed Source Distributions								Compare Input & Reconstructed Sink Samples					Sink Sample Weights
Age (Ma)	Source 1	Source 2	Source 3	Source 4	Source 5				Mean		St. Dev.			IP-23	IP-24	IP-25	IP-26	IP-27	IP-28	IP-29	IP-30	IP-31	M-32	M-33	M-34	M-35	D-37	D-38	D-39	D-40	D-41	IPMa	IPq	Mk	Ds
0	1.11027e-08	0	0	0	1.71232e-08			Cross-correlation	0.820878	±	0.102589		Weights Source 1	0.233062	0.416465	0.186572	0.182445	0	0.100866	0.0356733	0.103954	0.192278	0.573864	0.933438	0.865224	0.0188641	0.169983	0.144113	0.443221	0.12906	0	0.1619	0.102042	0.00876634	0
1	1.13724e-08	0	0	0	1.75391e-08			Likeness	0.794611	±	0.0488668		Weights Source 2	0.253819	0.149334	0.588271	0.403164	0	0.213636	0.489617	0.64895	0.704775	0	0.0665618	0	0.0198316	0.0667593	0.355481	0.332131	0.663786	0.0391221	0.309286	0.14338	0.0713771	0.171641
2	1.16481e-08	0	0	0	1.79642e-08			Kuiper V Value	0.0883736	±	0.0336017		Weights Source 3	0.44778	0.290786	0	0.379167	1	0.0615189	0.416922	0.00708282	0.0849777	0.0137238	0	0	0.538086	0.552287	0.383154	0.135941	0.0520878	0.00155995	0.317751	0.180255	0.643423	0.679051
3	1.19298e-08	0	0	0	1.83988e-08			KS D Value	0.0617743	±	0.0244512		Weights Source 4	0	0.127969	0.225157	0.0352236	0	0.371583	0.0250899	0.137908	0	0.00808491	0	0	0.423219	0.210971	0.0667825	0	0.0209685	0	0.136839	0.557132	0.276434	0.077774
4	1.22179e-08	0	0	0	1.8843e-08								Weights Source 5	0.0653386	0.0154458	0	0	0	0.252395	0.0326977	0.102104	0.0179695	0.404327	0	0.134776	0	0	0.0504692	0.088707	0.134098	0.959318	0.0742243	0.017191	0	0.0715336
5	1.25122e-08	0	0	0	1.9297e-08			Number of sink samples	23
6	1.28131e-08	0	0	0	1.97611e-08			Mean Cross-correlation of sink samples	0.28				Cross-correlation	0.827773	0.679808	0.573957	0.847382	0.922912	0.679874	0.765631	0.858749	0.860366	0.887124	0.911357	0.935242	0.870032	0.931531	0.665065	0.726381	0.857201	0.980819	0.8268	0.891634	0.85225	0.782864
7	1.31206e-08	0	0	0	2.02353e-08			Range Cross-correlation of sink samples	0.756				Likeness	0.812512	0.750192	0.686009	0.840986	0.830683	0.721515	0.770995	0.808172	0.803456	0.796757	0.837443	0.812452	0.78316	0.874343	0.732189	0.775938	0.788931	0.907201	0.784707	0.827962	0.803252	0.760069
8	1.34349e-08	0	0	0	2.072e-08			Mean Kuiper V value of sink samples	0.38				Kuiper V Value	0.0937114	0.0981604	0.140394	0.0611355	0.115511	0.102575	0.0798715	0.0571676	0.0701189	0.070051	0.0697002	0.139679	0.0653435	0.0526511	0.0821752	0.135503	0.0882375	0.0347846	0.0833652	0.0541318	0.0731868	0.0915782
9	1.3756e-08	0	0	0	2.12152e-08			Range Kuiper V value of sink samples	0.866				KS D Value	0.0517988	0.0639174	0.0788007	0.0562641	0.115441	0.0968494	0.0721189	0.0302797	0.050859	0.0594439	0.0428111	0.0739386	0.0475191	0.042869	0.0425045	0.104288	0.0810423	0.0184378	0.0424016	0.0371795	0.0661895	0.0549008
10	1.40842e-08	0	0	0	2.17213e-08			Final Residual	0.060181
11	1.44195e-08	0	0	0	2.22384e-08			Number of Iterations	800
12	1.4762e-08	0	0	0	2.27668e-08
13	1.51121e-08	0	0	0	2.33066e-08
14	1.54697e-08	0	0	0	2.38581e-08
15	1.5835e-08	0	0	0	2.44215e-08
16	1.62081e-08	0	0	0	2.49971e-08
17	1.65893e-08	0	0	0	2.5585e-08
18	1.69787e-08	0	0	0	2.61854e-08
19	1.73763e-08	0	0	0	2.67988e-08
20	1.77825e-08	0	0	0	2.74252e-08
21	1.81973e-08	0	0	0	2.80649e-08
22	1.86209e-08	0	0	0	2.87182e-08
23	1.90534e-08	0	0	0	2.93853e-08
24	1.94951e-08	0	0	0	3.00665e-08
25	1.99461e-08	0	0	0	3.07621e-08
26	2.04066e-08	0	0	0	3.14722e-08
27	2.08767e-08	0	0	0	3.21972e-08
28	2.13566e-08	0	0	0	3.29374e-08
29	2.18465e-08	0	0	0	3.3693e-08
30	2.23467e-08	0	0	0	3.44644e-08
31	2.28572e-08	0	0	0	3.52517e-08
32	2.33782e-08	0	0	0	3.60553e-08
33	2.391e-08	0	0	0	3.68755e-08
34	2.44528e-08	0	0	0	3.77126e-08
35	2.50067e-08	0	0	0	3.85668e-08
36	2.55719e-08	0	0	0	3.94386e-08
37	2.61487e-08	0	0	0	4.03281e-08
38	2.67372e-08	0	0	0	4.12358e-08
39	2.73377e-08	0	0	0	4.21619e-08
40	2.79503e-08	0	0	0	4.31068e-08
41	2.85754e-08	0	0	0	4.40708e-08
42	2.9213e-08	0	0	0	4.50542e-08
43	2.98634e-08	0	0	0	4.60573e-08
44	3.05269e-08	0	0	0	4.70806e-08
45	3.12037e-08	0	0	0	4.81244e-08
46	3.18939e-08	0	0	0	4.9189e-08
47	3.25979e-08	0	0	0	5.02747e-08
48	3.33158e-08	0	0	0	5.1382e-08
49	3.4048e-08	0	0	0	5.25112e-08
50	3.47946e-08	0	0	0	5.36626e-08
51	3.55559e-08	0	0	0	5.48368e-08
52	3.63321e-08	0	0	0	5.60339e-08
53	3.71235e-08	0	0	0	5.72545e-08
54	3.79304e-08	0	0	0	5.8499e-08
55	3.87529e-08	0	0	0	5.97676e-08
56	3.95915e-08	0	0	0	6.10609e-08
57	4.04462e-08	0	0	0	6.23792e-08
58	4.13175e-08	0	0	0	6.37229e-08
59	4.22055e-08	0	0	0	6.50925e-08
60	4.31106e-08	0	0	0	6.64884e-08
61	4.4033e-08	0	0	0	6.79111e-08
62	4.4973e-08	0	0	0	6.93608e-08
63	4.59309e-08	0	0	0	7.08382e-08
64	4.6907e-08	0	0	0	7.23436e-08
65	4.79016e-08	0	0	0	7.38776e-08
66	4.89149e-08	0	0	0	7.54404e-08
67	4.99473e-08	0	0	0	7.70327e-08
68	5.09991e-08	0	0	0	7.86549e-08
69	5.20705e-08	0	0	0	8.03074e-08
70	5.3162e-08	0	0	0	8.19907e-08
71	5.42737e-08	0	0	0	8.37054e-08
72	5.54061e-08	0	0	0	8.54519e-08
73	5.65594e-08	0	0	0	8.72307e-08
74	5.7734e-08	0	0	0	8.90422e-08
75	5.89302e-08	0	0	0	9.08871e-08
76	6.01483e-08	0	0	0	9.27659e-08
77	6.13887e-08	0	0	0	9.46789e-08
78	6.26517e-08	0	0	0	9.66269e-08
79	6.39376e-08	0	0	0	9.86102e-08
80	6.52468e-08	0	0	0	1.00629e-07
81	6.65797e-08	0	0	0	1.02685e-07
82	6.79366e-08	0	0	0	1.04778e-07
83	6.93179e-08	0	0	0	1.06908e-07
84	7.07238e-08	0	0	0	1.09077e-07
85	7.21549e-08	0	0	0	1.11284e-07
86	7.36114e-08	0	0	0	1.1353e-07
87	7.50938e-08	0	0	0	1.15817e-07
88	7.66023e-08	0	0	0	1.18143e-07
89	7.81375e-08	0	0	0	1.20511e-07
90	7.96996e-08	0	0	0	1.2292e-07
91	8.12892e-08	0	0	0	1.25372e-07
92	8.29064e-08	0	0	0	1.27866e-07
93	8.45518e-08	0	0	0	1.30404e-07
94	8.62258e-08	0	0	0	1.32986e-07
95	8.79288e-08	0	0	0	1.35613e-07
96	8.96611e-08	0	0	0	1.38284e-07
97	9.14232e-08	0	0	0	1.41002e-07
98	9.32155e-08	0	0	0	1.43767e-07
99	9.50384e-08	0	0	0	1.46578e-07
100	9.68923e-08	0	0	0	1.49437e-07
101	9.87777e-08	0	0	0	1.52345e-07
102	1.00695e-07	0	0	0	1.55303e-07
103	1.02645e-07	0	0	0	1.5831e-07
104	1.04627e-07	0	0	0	1.61367e-07
105	1.06643e-07	0	0	0	1.64476e-07
106	1.08692e-07	0	0	0	1.67637e-07
107	1.10775e-07	0	0	0	1.7085e-07
108	1.12893e-07	0	0	0	1.74117e-07
109	1.15046e-07	0	0	0	1.77437e-07
110	1.17235e-07	0	0	0	1.80813e-07
111	1.19459e-07	0	0	0	1.84243e-07
112	1.2172e-07	0	0	0	1.8773e-07
113	1.24017e-07	0	0	0	1.91274e-07
114	1.26352e-07	0	0	0	1.94875e-07
115	1.28725e-07	0	0	0	1.98535e-07
116	1.31136e-07	0	0	0	2.02254e-07
117	1.33586e-07	0	0	0	2.06033e-07
118	1.36075e-07	0	0	0	2.09872e-07
119	1.38604e-07	0	0	0	2.13772e-07
120	1.41173e-07	0	0	0	2.17735e-07
121	1.43783e-07	0	0	0	2.21761e-07
122	1.46435e-07	0	0	0	2.2585e-07
123	1.49128e-07	0	0	0	2.30004e-07
124	1.51863e-07	0	0	0	2.34223e-07
125	1.54641e-07	0	0	0	2.38508e-07
126	1.57463e-07	0	0	0	2.42859e-07
127	1.60328e-07	0	0	0	2.47279e-07
128	1.63238e-07	0	0	0	2.51766e-07
129	1.66192e-07	0	0	0	2.56323e-07
130	1.69192e-07	0	0	0	2.6095e-07
131	1.72238e-07	0	0	0	2.65648e-07
132	1.7533e-07	0	0	0	2.70418e-07
133	1.78469e-07	0	0	0	2.7526e-07
134	1.81656e-07	0	0	0	2.80175e-07
135	1.84891e-07	0	0	0	2.85164e-07
136	1.88174e-07	0	0	0	2.90229e-07
137	1.91507e-07	0	0	0	2.95369e-07
138	1.9489e-07	0	0	0	3.00586e-07
139	1.98322e-07	0	0	0	3.0588e-07
140	2.01806e-07	0	0	0	3.11253e-07
141	2.05341e-07	0	0	0	3.16705e-07
142	2.08927e-07	0	0	0	3.22238e-07
143	2.12567e-07	0	0	0	3.27851e-07
144	2.16259e-07	0	0	0	3.33546e-07
145	2.20005e-07	0	0	0	3.39324e-07
146	2.23806e-07	0	0	0	3.45185e-07
147	2.27661e-07	0	0	0	3.51131e-07
148	2.31571e-07	0	0	0	3.57162e-07
149	2.35537e-07	0	0	0	3.63279e-07
150	2.3956e-07	0	0	0	3.69483e-07
151	2.4364e-07	0	0	0	3.75776e-07
152	2.47777e-07	0	0	0	3.82157e-07
153	2.51973e-07	0	0	0	3.88628e-07
154	2.56228e-07	0	0	0	3.9519e-07
155	2.60541e-07	0	0	0	4.01843e-07
156	2.64915e-07	0	0	0	4.08589e-07
157	2.6935e-07	0	0	0	4.15428e-07
158	2.73846e-07	0	0	0	4.22361e-07
159	2.78403e-07	0	0	0	4.2939e-07
160	2.83023e-07	0	0	0	4.36514e-07
161	2.87706e-07	0	0	0	4.43736e-07
162	2.92452e-07	0	0	0	4.51055e-07
163	2.97263e-07	0	0	0	4.58473e-07
164	3.02138e-07	0	0	0	4.65991e-07
165	3.07078e-07	0	0	0	4.7361e-07
166	3.12085e-07	0	0	0	4.8133e-07
167	3.17158e-07	0	0	0	4.89152e-07
168	3.22298e-07	0	0	0	4.97077e-07
169	3.27506e-07	0	0	0	5.05107e-07
170	3.32782e-07	0	0	0	5.13242e-07
171	3.38128e-07	0	0	0	5.21483e-07
172	3.43543e-07	0	0	0	5.2983e-07
173	3.49028e-07	0	0	0	5.38286e-07
174	3.54584e-07	0	0	0	5.4685e-07
175	3.60211e-07	0	0	0	5.55524e-07
176	3.65911e-07	0	0	0	5.64308e-07
177	3.71683e-07	0	0	0	5.73203e-07
178	3.77529e-07	0	0	0	5.82211e-07
179	3.83448e-07	0	0	0	5.91332e-07
180	3.89443e-07	0	0	0	6.00566e-07
181	3.95512e-07	0	0	0	6.09916e-07
182	4.01658e-07	0	0	0	6.19381e-07
183	4.0788e-07	0	0	0	6.28963e-07
184	4.14179e-07	0	0	0	6.38662e-07
185	4.20556e-07	0	0	0	6.48479e-07
186	4.27012e-07	0	0	0	6.58416e-07
187	4.33547e-07	0	0	0	6.68472e-07
188	4.40162e-07	0	0	0	6.78649e-07
189	4.46858e-07	0	0	0	6.88948e-07
190	4.53636e-07	0	0	0	6.99368e-07
191	4.60495e-07	0	0	0	7.09912e-07
192	4.67438e-07	0	0	0	7.2058e-07
193	4.74464e-07	0	0	0	7.31373e-07
194	4.81575e-07	0	0	0	7.42291e-07
195	4.88772e-07	0	0	0	7.53334e-07
196	4.96055e-07	0	0	0	7.64505e-07
197	5.03425e-07	0	0	0	7.75804e-07
198	5.10883e-07	0	0	0	7.8723e-07
199	5.1843e-07	0	0	0	7.98785e-07
200	5.26068e-07	0	0	0	8.1047e-07
201	5.33796e-07	0	0	0	8.22285e-07
202	5.41617e-07	0	0	0	8.34231e-07
203	5.49531e-07	0	0	0	8.46308e-07
204	5.5754e-07	0	0	0	8.58517e-07
205	5.65645e-07	0	0	0	8.70858e-07
206	5.73847e-07	0	0	0	8.83332e-07
207	5.82147e-07	0	0	0	8.95939e-07
208	5.90548e-07	0	0	0	9.0868e-07
209	5.9905e-07	0	0	0	9.21555e-07
210	6.07656e-07	0	0	0	9.34564e-07
211	6.16367e-07	0	0	0	9.47707e-07
212	6.25186e-07	0	0	0	9.60986e-07
213	6.34113e-07	0	0	0	9.74399e-07
214	6.43152e-07	0	0	0	9.87948e-07
215	6.52305e-07	0	0	0	1.00163e-06
216	6.61575e-07	0	0	0	1.01545e-06
217	6.70963e-07	0	0	0	1.0294e-06
218	6.80473e-07	0	0	0	1.04349e-06
219	6.90108e-07	0	0	0	1.05771e-06
220	6.99872e-07	0	0	0	1.07207e-06
221	7.09767e-07	0	0	0	1.08656e-06
222	7.19799e-07	0	0	0	1.10119e-06
223	7.2997e-07	0	0	0	1.11594e-06
224	7.40286e-07	0	0	0	1.13083e-06
225	7.5075e-07	0	0	0	1.14585e-06
226	7.6137e-07	0	0	0	1.161e-06
227	7.72148e-07	0	0	0	1.17628e-06
228	7.83093e-07	0	0	0	1.19169e-06
229	7.9421e-07	0	0	0	1.20722e-06
230	8.05505e-07	0	0	0	1.22288e-06
231	8.16987e-07	0	0	0	1.23866e-06
232	8.28663e-07	0	0	0	1.25456e-06
233	8.40542e-07	0	0	0	1.27058e-06
234	8.52632e-07	0	0	0	1.28671e-06
235	8.64944e-07	0	0	0	1.30296e-06
236	8.77488e-07	0	0	0	1.31932e-06
237	8.90275e-07	0	0	0	1.33579e-06
238	9.03317e-07	0	0	0	1.35237e-06
239	9.16627e-07	0	0	0	1.36904e-06
240	9.30218e-07	0	0	0	1.38581e-06
241	9.44106e-07	0	0	0	1.40267e-06
242	9.58305e-07	0	0	0	1.41963e-06
243	9.72834e-07	0	0	0	1.43666e-06
244	9.87708e-07	0	0	0	1.45378e-06
245	1.00295e-06	0	0	0	1.47096e-06
246	1.01857e-06	0	0	0	1.48822e-06
247	1.03461e-06	0	0	0	1.50553e-06
248	1.05107e-06	0	0	0	1.5229e-06
249	1.06799e-06	0	0	0	1.54031e-06
250	1.08539e-06	0	0	0	1.55777e-06
251	1.1033e-06	0	0	0	1.57525e-06
252	1.12174e-06	0	0	0	1.59275e-06
253	1.14076e-06	0	0	0	1.61027e-06
254	1.16037e-06	0	0	0	1.62779e-06
255	1.18062e-06	0	0	0	1.6453e-06
256	1.20155e-06	0	0	0	1.66279e-06
257	1.22318e-06	0	0	0	1.68025e-06
258	1.24557e-06	0	0	0	1.69766e-06
259	1.26876e-06	0	0	0	1.71502e-06
260	1.29279e-06	0	0	0	1.73231e-06
261	1.31771e-06	0	0	0	1.74952e-06
262	1.34357e-06	0	0	0	1.76663e-06
263	1.37042e-06	0	0	0	1.78362e-06
264	1.39832e-06	0	0	0	1.80048e-06
265	1.42734e-06	0	0	0	1.81719e-06
266	1.45752e-06	0	0	0	1.83373e-06
267	1.48894e-06	0	0	0	1.85009e-06
268	1.52167e-06	0	0	0	1.86624e-06
269	1.55576e-06	0	0	0	1.88216e-06
270	1.59131e-06	0	0	0	1.89783e-06
271	1.62838e-06	0	0	0	1.91323e-06
272	1.66706e-06	0	0	0	1.92834e-06
273	1.70743e-06	0	0	0	1.94313e-06
274	1.74958e-06	0	0	0	1.95758e-06
275	1.7936e-06	0	0	0	1.97165e-06
276	1.83958e-06	0	0	0	1.98533e-06
277	1.88762e-06	0	0	0	1.99859e-06
278	1.93783e-06	0	0	0	2.0114e-06
279	1.99031e-06	0	0	0	2.02373e-06
280	2.04517e-06	0	0	0	2.03556e-06
281	2.10254e-06	0	0	0	2.04685e-06
282	2.16251e-06	0	0	0	2.0576e-06
283	2.22523e-06	0	0	0	2.06777e-06
284	2.29083e-06	0	0	0	2.07734e-06
285	2.35943e-06	0	0	0	2.08632e-06
286	2.43119e-06	0	0	0	2.09471e-06
287	2.50626e-06	0	0	0	2.10251e-06
288	2.5848e-06	0	0	0	2.10978e-06
289	2.66701e-06	0	0	0	2.11659e-06
290	2.75309e-06	0	0	0	2.12303e-06
291	2.84325e-06	0	0	0	2.12928e-06
292	2.93777e-06	0	0	0	2.13557e-06
293	3.03306e-06	0	1.73499e-08	0	2.14028e-06
294	3.13144e-06	0	4.32495e-08	0	2.14484e-06
295	3.23479e-06	0	7.12527e-08	0	2.15056e-06
296	3.34358e-06	0	1.01499e-07	0	2.15823e-06
297	3.45818e-06	0	1.33387e-07	3.80292e-09	2.16861e-06
298	3.5757e-06	0	1.53884e-07	7.88201e-08	2.17914e-06
299	3.69975e-06	0	1.73086e-07	1.74119e-07	2.19431e-06
300	3.83109e-06	0	1.8991e-07	2.96017e-07	2.21571e-06
301	3.97061e-06	0	2.02874e-07	4.53045e-07	2.24526e-06
302	4.11939e-06	0	2.09887e-07	6.57318e-07	2.28513e-06
303	4.2653e-06	5.20647e-08	1.97803e-07	9.08867e-07	2.33056e-06
304	4.32729e-06	4.78453e-07	9.95767e-08	1.12388e-06	2.34007e-06
305	4.37094e-06	1.00677e-06	0	1.41264e-06	2.35023e-06
306	4.38646e-06	1.62129e-06	0	1.76706e-06	2.35812e-06
307	4.3736e-06	2.36221e-06	0	2.38641e-06	2.35712e-06
308	4.32653e-06	3.23188e-06	0	3.4829e-06	2.33558e-06
309	4.23892e-06	4.21953e-06	0	5.39493e-06	2.2743e-06
310	4.10408e-06	5.29665e-06	0	8.62141e-06	2.14443e-06
311	3.91506e-06	6.41471e-06	0	1.3835e-05	1.90655e-06
312	3.66494e-06	7.50854e-06	0	2.18499e-05	1.5124e-06
313	3.34718e-06	8.50834e-06	0	3.35187e-05	9.10614e-07
314	2.95597e-06	9.36183e-06	0	4.95478e-05	5.72736e-08
315	2.32726e-06	9.98085e-06	0	7.01734e-05	0
316	1.57077e-06	1.05014e-05	0	9.50809e-05	0
317	7.04108e-07	1.11141e-05	0	0.000123044	0
318	0	1.20294e-05	0	0.000151899	0
319	0	1.34511e-05	0	0.000178756	0
320	0	1.6035e-05	0	0.000200622	0
321	0	2.0138e-05	0	0.00021477	0
322	0	2.59786e-05	0	0.000219415	0
323	0	3.35794e-05	0	0.000214141	0
324	0	4.27526e-05	0	0.000200003	0
325	0	5.31333e-05	0	0.000179283	0
326	0	6.42483e-05	0	0.000154978	0
327	0	7.56013e-05	0	0.000130183	0
328	0	8.67481e-05	0	0.000107535	0
329	0	9.73444e-05	0	8.88781e-05	0
330	0	0.000107161	0	7.51705e-05	0
331	0	0.000116068	0	6.66299e-05	0
332	0	0.000124003	0	6.30109e-05	0
333	0	0.000130929	0	6.39286e-05	0
334	0	0.000136812	0	6.9135e-05	0
335	0	0.000141596	0	7.86911e-05	0
336	0	0.000145215	0	9.29954e-05	0
337	0	0.000147617	0	0.000112653	0
338	0	0.00014881	0	0.000138197	0
339	0	0.00014892	0	0.000169706	0
340	0	0.000148242	0	0.000206429	0
341	0	0.000147269	0	0.000246543	0
342	0	0.000146674	0	0.000287181	0
343	0	0.00014723	0	0.000324811	0
344	0	0.000149685	0	0.000355906	0
345	0	0.000154611	0	0.000377742	0
346	0	0.000162262	0	0.000389056	0
347	0	0.000172499	0	0.000390352	0
348	0	0.000184781	0	0.000383724	0
349	0	0.000198261	0	0.000372283	0
350	0	0.00020955	7.51724e-06	0.000353663	0
351	0	0.000218478	1.99281e-05	0.000332744	0
352	0	0.000225318	3.37272e-05	0.000314155	0
353	0	0.000229364	4.92675e-05	0.000298519	0
354	0	0.000230126	6.69101e-05	0.00028549	0
355	0	0.000227273	8.68583e-05	0.00027411	0
356	2.75951e-06	0.000219621	0.000108895	0.000262912	0
357	6.12542e-06	0.000207612	0.000132597	0.000250972	0
358	9.63729e-06	0.000191194	0.000157115	0.000237541	0
359	1.30488e-05	0.000170484	0.000181377	0.00022239	0
360	1.61523e-05	0.000146038	0.000204316	0.000205942	0
361	1.88301e-05	0.000118955	0.000225055	0.000189239	0
362	2.10677e-05	9.07758e-05	0.000243011	0.000173713	0
363	2.29249e-05	6.3213e-05	0.000257882	0.000160814	0
364	2.44846e-05	3.7799e-05	0.000269559	0.000151601	0
365	2.58096e-05	1.56174e-05	0.000278052	0.000146453	0
366	2.61457e-05	0	0.000282889	0.000143971	0
367	2.29838e-05	0	0.000282465	0.000139933	0
368	2.06058e-05	0	0.00027999	0.00013893	0
369	1.89099e-05	0	0.000275625	0.000140459	0
370	1.77953e-05	0	0.000269404	0.000145756	0
371	1.71616e-05	0	0.000260998	0.000159212	0
372	1.69139e-05	0	0.000249394	0.000189878	0
373	1.70134e-05	0	0.000232583	0.000252459	0
374	1.7577e-05	0	0.000207614	0.000365978	0
375	1.42744e-05	0	0.000171355	0.000543846	2.72882e-05
376	6.04684e-06	0	0.000124054	0.00078207	9.07967e-05
377	0	0	7.26648e-05	0.00104081	0.00017147
378	0	0	3.18954e-05	0.00124282	0.000246724
379	0	0	1.93371e-05	0.00130901	0.000290413
380	0	0	4.38084e-05	0.00120741	0.00028499
381	7.3325e-06	0	9.97148e-05	0.000979988	0.000233678
382	2.13437e-05	0	0.000173419	0.000718893	0.000161193
383	3.06256e-05	0	0.000254146	0.000509372	9.75517e-05
384	3.21208e-05	0	0.000338491	0.000387108	5.75123e-05
385	2.58283e-05	0	0.000428769	0.000341678	4.10967e-05
386	1.39929e-05	0	0.000526466	0.000343078	4.05906e-05
387	0	0	0.000628017	0.000364501	4.75007e-05
388	0	0	0.000724491	0.000387816	5.11815e-05
389	0	0	0.00081023	0.000409437	5.43671e-05
390	0	0	0.000882281	0.000427903	5.64736e-05
391	0	0	0.000942576	0.000444634	5.77211e-05
392	0	0	0.000995494	0.000463989	5.8297e-05
393	0	0	0.0010445	0.00049334	5.78251e-05
394	0	0	0.00109049	0.000541659	5.53912e-05
395	0	0	0.00113269	0.000616618	5.0091e-05
396	0	0	0.00117084	0.000721616	4.17148e-05
397	0	0	0.00120681	0.000854405	3.10996e-05
398	0	0	0.00124429	0.00100807	1.9915e-05
399	0	0	0.00128721	0.00117384	1.00149e-05
400	0	0	0.00133776	0.00134417	2.70823e-06
401	0	0	0.00139532	0.00151459	0
402	0	0	0.00145657	0.00168456	0
403	0	0	0.00151634	0.00185595	0
404	0	0	0.00156867	0.00203105	0
405	0	0	0.00160809	0.00221199	0
406	0	0	0.00163068	0.00240061	0
407	0	0	0.00163469	0.00259878	0
408	0	0	0.00162089	0.0028083	0
409	0	0	0.00159242	0.00303009	0
410	0	0	0.00155399	0.00326298	0
411	0	0	0.00151077	0.0035027	0
412	0	0	0.00146728	0.00374189	0
413	0	0	0.00142664	0.00397157	0
414	5.53229e-06	0	0.00138991	0.00418317	0
415	2.80942e-05	0	0.00135662	0.00437355	0
416	4.94186e-05	0	0.00132976	0.0045589	0
417	6.77183e-05	0	0.00131103	0.0047665	0
418	8.04011e-05	0	0.00130282	0.00503561	0
419	8.48313e-05	0	0.00130741	0.00540758	0
420	7.92973e-05	0	0.00132601	0.00591217	0
421	6.3626e-05	0	0.00135834	0.00655587	0
422	3.9204e-05	0	0.00140284	0.00731633	0
423	8.68169e-06	0	0.00145746	0.00814365	0
424	0	0	0.00151736	0.0089607	0
425	0	0	0.00158263	0.00968816	0
426	0	0	0.00165307	0.0102458	0
427	0	0	0.00172801	0.0105662	0
428	0	0	0.0018079	0.0106107	0
429	0	4.02877e-06	0.00189384	0.0103762	0
430	0	0.000146669	0.00195852	0.00983921	0
431	0	0.000335475	0.00202571	0.00910001	0
432	0	0.000550379	0.00210001	0.00823866	0
433	0	0.000765509	0.00218213	0.00733389	6.08638e-06
434	0	0.000955275	0.00226692	0.00645162	2.28987e-05
435	0	0.00110142	0.00234395	0.00563971	3.58068e-05
436	0	0.00119275	0.0024005	0.0049236	4.18051e-05
437	0	0.00122779	0.00242629	0.00430921	4.05276e-05
438	0	0.00121372	0.00241756	0.00378813	3.40966e-05
439	0	0.00116349	0.00237832	0.0033441	2.58158e-05
440	0	0.00109233	0.00231838	0.00295939	1.85701e-05
441	0	0.00101457	0.00224927	0.00261933	1.38329e-05
442	0	0.000941222	0.00218038	0.00231452	1.16509e-05
443	0	0.000878323	0.00211706	0.00204073	1.13271e-05
444	0	0.000826543	0.00206093	0.00179719	1.22178e-05
445	0	0.000782079	0.00201148	0.00158426	1.41827e-05
446	0	0.000738655	0.00196788	0.00140146	1.75649e-05
447	0	0.000689859	0.00193007	0.00124661	2.28643e-05
448	0	0.000630967	0.00189905	0.00111616	3.03573e-05
449	0	0.00055977	0.00187646	0.00100658	3.98478e-05
450	0	0.000476372	0.00186392	0.00091631	5.06144e-05
451	0	0.000382339	0.00186239	0.000847388	6.15301e-05
452	0	0.000279768	0.00187176	0.000806038	7.13094e-05
453	0	0.000170788	0.00189061	0.000801191	7.88507e-05
454	0	5.77991e-05	0.0019161	0.000840691	8.36475e-05
455	0	0	0.0019317	0.000903701	7.35197e-05
456	0	0	0.00193235	0.000982209	5.07982e-05
457	0	0	0.0019259	0.00108217	3.30075e-05
458	0	0	0.00190821	0.00118063	2.49981e-05
459	0	0	0.00187684	0.00125683	3.05112e-05
460	0	0	0.00183183	0.00129951	5.06427e-05
461	0	0	0.0017757	0.00130951	8.30676e-05
462	0	0	0.00171275	0.00129661	0.000122391
463	0	0	0.00164782	0.00127311	0.000161451
464	0	0	0.00158521	0.00124838	0.00019303
465	0	0	0.00152795	0.00122678	0.000211427
466	0	0	0.00147768	0.0012088	0.000213562
467	0	0	0.0014348	0.00119322	0.000199484
468	0	0	0.00139865	0.00117821	0.000172275
469	0	0	0.00136765	0.00116113	0.000137363
470	0	0	0.00133921	0.00113799	0.000101332
471	0	0	0.00130982	0.00110378	7.04607e-05
472	0	0	0.00127522	0.00105433	4.93473e-05
473	0	0	0.001231	0.000988619	4.00282e-05
474	0	0	0.00117341	0.000910304	4.18661e-05
475	0	0	0.00110045	0.000827383	5.22133e-05
476	0	0	0.00101264	0.00074996	6.7559e-05
477	0	0	0.000913349	0.000687163	8.46953e-05
478	0	0	0.000808164	0.000644515	0.000101492
479	0	0	0.000703741	0.000622656	0.000117101
480	0	0	0.000606309	0.000617576	0.000131688
481	3.91336e-06	0	0.000520102	0.000621207	0.000144533
482	1.93998e-05	5.04041e-07	0.000446734	0.000623158	0.00015351
483	2.7816e-05	1.56327e-05	0.000385511	0.000613168	0.000162622
484	3.37873e-05	2.92855e-05	0.000338528	0.000591118	0.000173994
485	3.77702e-05	4.17825e-05	0.000303878	0.000554734	0.000187157
486	4.01985e-05	5.31152e-05	0.000279412	0.000505838	0.000201446
487	4.14163e-05	6.30572e-05	0.000263064	0.000449602	0.000216125
488	4.16689e-05	7.13336e-05	0.00025303	0.000392975	0.000230498
489	4.1125e-05	7.77923e-05	0.000247833	0.000342818	0.000243993
490	3.99068e-05	8.25263e-05	0.000246329	0.000304371	0.000256214
491	3.81174e-05	8.59173e-05	0.000247642	0.000280439	0.00026695
492	3.58613e-05	8.86054e-05	0.00025106	0.000271331	0.000276161
493	3.32581e-05	9.1406e-05	0.000255926	0.000275317	0.000283928
494	3.04498e-05	9.52074e-05	0.00026155	0.000289279	0.000290411
495	2.76013e-05	0.000100867	0.000267186	0.000309317	0.000295803
496	2.48952e-05	0.000109116	0.000272068	0.000331212	0.000300299
497	2.25209e-05	0.000120483	0.000275489	0.000350796	0.000304068
498	2.06605e-05	0.000135216	0.000276895	0.000364289	0.000307231
499	1.9475e-05	0.000153239	0.000275971	0.000368644	0.000309843
500	1.90907e-05	0.000174116	0.000272674	0.000361878	0.000311875
501	1.95923e-05	0.00019707	0.000267234	0.000343325	0.000313214
502	2.10188e-05	0.000221035	0.0002601	0.00031374	0.000313664
503	2.33664e-05	0.000244749	0.00025185	0.000275201	0.000312972
504	2.65938e-05	0.000266891	0.000243099	0.00023081	0.000310857
505	3.06299e-05	0.000286214	0.000234399	0.000184259	0.000307055
506	3.53812e-05	0.000301679	0.000226171	0.000139321	0.000301355
507	4.07377e-05	0.000312561	0.000218665	9.9382e-05	0.000293632
508	4.65773e-05	0.000318508	0.000211956	6.70786e-05	0.000283867
509	5.27691e-05	0.000319549	0.000205967	4.40935e-05	0.000272153
510	5.91757e-05	0.000316067	0.000200517	3.11021e-05	0.000258682
511	6.56568e-05	0.000308728	0.000195369	2.78523e-05	0.000243727
512	7.20732e-05	0.000298393	0.000190289	3.33285e-05	0.000227612
513	7.82923e-05	0.000286026	0.000185086	4.59579e-05	0.000210685
514	8.41938e-05	0.0002726	0.000179641	6.38225e-05	0.000193292
515	8.96754e-05	0.000259024	0.000173924	8.48584e-05	0.000175756
516	9.46573e-05	0.000246083	0.000167987	0.000107033	0.000158356
517	9.90843e-05	0.000234402	0.000161954	0.000128498	0.000141327
518	0.000102927	0.000224423	0.000155994	0.000147722	0.000124847
519	0.000106178	0.000216402	0.000150297	0.000163592	0.000109042
520	0.000108853	0.000210419	0.000145047	0.000175486	9.3989e-05
521	0.000110979	0.000206398	0.000140405	0.000183305	7.97207e-05
522	0.000112596	0.000204133	0.000136498	0.000187458	6.62337e-05
523	0.000113745	0.000203315	0.000133414	0.000188811	5.34967e-05
524	0.000114471	0.000203569	0.000131216	0.000188584	4.14585e-05
525	0.000114811	0.00020448	0.000129952	0.000188238	3.00561e-05
526	0.000114795	0.000205623	0.000129671	0.00018933	1.92213e-05
527	0.000114447	0.00020659	0.000130443	0.000193377	8.88773e-06
528	0.00011363	0.000206932	0.000132365	0.000201656	0
529	0.000111236	0.000205746	0.000135567	0.000214713	0
530	0.000108593	0.000203502	0.000140186	0.000233765	0
531	0.000105707	0.00020006	0.000146362	0.000258943	0
532	0.0001026	0.000195398	0.0001542	0.000289813	0
533	9.93096e-05	0.000189609	0.00016374	0.000325345	0
534	9.58981e-05	0.000182911	0.00017492	0.000363933	0
535	9.245e-05	0.000175625	0.000187559	0.00040347	0
536	8.90686e-05	0.000168155	0.000201357	0.0004415	0
537	8.58663e-05	0.00016094	0.000215916	0.00047542	0
538	8.29493e-05	0.000154407	0.00023079	0.000502733	0
539	8.03997e-05	0.000148907	0.000245555	0.000521318	0
540	7.82568e-05	0.000144659	0.000259889	0.000529674	0
541	7.65027e-05	0.000141709	0.000273638	0.000527111	0
542	7.50556e-05	0.000139896	0.000286864	0.000513868	0
543	7.3775e-05	0.000138854	0.000299839	0.000491136	0
544	7.24786e-05	0.000138026	0.000312987	0.000461002	0
545	7.0972e-05	0.000136709	0.000326776	0.000426324	0
546	6.9085e-05	0.000134116	0.000341565	0.000390536	0
547	6.67095e-05	0.000129458	0.000357449	0.000357397	0
548	6.38297e-05	0.000122034	0.000374135	0.000330666	0
549	6.05382e-05	0.00011135	0.000390875	0.000313715	0
550	5.70329e-05	9.72199e-05	0.000406501	0.000309088	0
551	5.35931e-05	7.98622e-05	0.000419538	0.00031808	0
552	5.05388e-05	5.99523e-05	0.000428405	0.000340452	0
553	4.81782e-05	3.86055e-05	0.000431644	0.000374392	0
554	4.67173e-05	1.72555e-05	0.000428133	0.000416842	2.56764e-07
555	4.44486e-05	0	0.000416661	0.00046271	7.4806e-06
556	3.92523e-05	0	0.000394969	0.00050535	1.50801e-05
557	3.54694e-05	0	0.000367004	0.000549791	2.69121e-05
558	3.27356e-05	0	0.000333592	0.000597479	4.46294e-05
559	3.03976e-05	0	0.000295466	0.000653236	7.00969e-05
560	2.75334e-05	0	0.000252872	0.00072605	0.000105673
561	2.30054e-05	0	0.000205238	0.00082931	0.00015451
562	1.56389e-05	0	0.000151314	0.000978534	0.000220131
563	4.68318e-06	0	9.04317e-05	0.0011836	0.000304108
564	0	0	2.4011e-05	0.00143333	0.000398245
565	0	0	0	0.00164998	0.000485175
566	0	0	0	0.00179746	0.000546809
567	0	0	0	0.00184322	0.000564391
568	0	0	0	0.00176141	0.000529057
569	0	0	0	0.0015716	0.000449928
570	0	0	0	0.00132696	0.000349285
571	2.28166e-06	0	4.90312e-05	0.00103748	0.000245558
572	1.48772e-05	0	8.77102e-05	0.00079419	0.000156582
573	2.43655e-05	0	0.000112744	0.000614523	9.23537e-05
574	3.1173e-05	0	0.000125931	0.000489804	5.0136e-05
575	3.60705e-05	0	0.000130558	0.000404622	2.45207e-05
576	3.96836e-05	0	0.000129592	0.000346056	1.07e-05
577	4.23677e-05	0	0.000125126	0.000306178	5.40459e-06
578	4.42676e-05	0	0.000118496	0.000281139	6.65335e-06
579	4.54118e-05	0	0.000110524	0.00026953	1.32587e-05
580	4.57876e-05	0	0.000101734	0.000271042	2.44306e-05
581	4.41029e-05	5.04966e-06	9.15368e-05	0.000283682	3.88077e-05
582	4.09609e-05	1.29798e-05	8.07201e-05	0.000307361	5.59044e-05
583	3.72935e-05	2.06179e-05	7.03441e-05	0.000341206	7.51196e-05
584	3.33203e-05	2.78834e-05	6.09953e-05	0.000381925	9.51195e-05
585	2.93183e-05	3.47299e-05	5.3362e-05	0.000425043	0.000114293
586	2.55942e-05	4.11375e-05	4.81616e-05	0.000465411	0.000130903
587	2.24435e-05	4.71066e-05	4.60233e-05	0.000497947	0.000143313
588	2.01058e-05	5.26543e-05	4.73541e-05	0.00051847	0.000150248
589	1.87258e-05	5.78101e-05	5.22275e-05	0.00052442	0.000151012
590	1.83312e-05	6.26109e-05	6.03258e-05	0.000515282	0.000145622
591	1.8832e-05	6.70933e-05	7.09585e-05	0.000492631	0.000134792
592	2.00416e-05	7.12823e-05	8.31546e-05	0.00045977	0.000119802
593	2.17146e-05	7.51779e-05	9.58103e-05	0.000421093	0.000102259
594	2.359e-05	7.87408e-05	0.000107857	0.000381322	8.38241e-05
595	2.54313e-05	8.18809e-05	0.000118411	0.000344808	6.59608e-05
596	2.70547e-05	8.44506e-05	0.000126883	0.000315034	4.97605e-05
597	2.83424e-05	8.6247e-05	0.000133015	0.000294373	3.5865e-05
598	2.9241e-05	8.70248e-05	0.00013687	0.000284088	2.44839e-05
599	2.97514e-05	8.65217e-05	0.000138761	0.000284489	1.54812e-05
600	2.99138e-05	8.44951e-05	0.000139157	0.000295139	8.4984e-06
601	2.97949e-05	8.07692e-05	0.000138582	0.000315032	3.08024e-06
602	2.92961e-05	7.51872e-05	0.000137514	0.000342625	0
603	2.83475e-05	6.77595e-05	0.000136315	0.000375949	0
604	2.74772e-05	5.89917e-05	0.00013518	0.000412869	0
605	2.67814e-05	4.93399e-05	0.000134128	0.00045066	0
606	2.6378e-05	3.94187e-05	0.000133017	0.000486327	0
607	2.63952e-05	2.99313e-05	0.00013159	0.000516821	0
608	2.69564e-05	2.15744e-05	0.000129539	0.000539355	0
609	2.81628e-05	1.49345e-05	0.000126577	0.000551745	0
610	3.00782e-05	1.03949e-05	0.000122505	0.000552734	0
611	3.27192e-05	8.07363e-06	0.000117256	0.000542187	0
612	3.60525e-05	7.80647e-06	0.000110915	0.000521127	0
613	4.00005e-05	9.17793e-06	0.000103709	0.000491587	0
614	4.44539e-05	1.15939e-05	9.59699e-05	0.0004563	0
615	4.92888e-05	1.43798e-05	8.80796e-05	0.000418305	0
616	5.4384e-05	1.68826e-05	8.04105e-05	0.000380533	0
617	5.96362e-05	1.8559e-05	7.32749e-05	0.000345458	0
618	6.49706e-05	1.90335e-05	6.68878e-05	0.000314875	0
619	6.99608e-05	1.79194e-05	6.13532e-05	0.000289636	2.57103e-06
620	7.49966e-05	1.5427e-05	5.66609e-05	0.000270223	5.01993e-06
621	8.00863e-05	1.17e-05	5.27099e-05	0.000256351	7.37695e-06
622	8.52515e-05	6.98167e-06	4.93332e-05	0.000247344	9.69789e-06
623	9.05197e-05	1.56649e-06	4.63263e-05	0.000242327	1.20535e-05
624	9.48333e-05	0	4.26547e-05	0.000238901	1.39461e-05
625	9.88697e-05	0	3.86074e-05	0.00023716	1.57982e-05
626	0.000103104	0	3.43519e-05	0.000237097	1.79237e-05
627	0.000107589	0	2.97774e-05	0.000238324	2.04084e-05
628	0.000112353	0	2.48014e-05	0.000240613	2.33203e-05
629	0.000117404	0	1.93718e-05	0.000243874	2.67085e-05
630	0.00012273	0	1.34672e-05	0.000248108	3.06022e-05
631	0.000128308	0	7.09708e-06	0.000253369	3.50103e-05
632	0.000134104	0	3.00918e-07	0.000259725	3.99202e-05
633	0.000139153	0	0	0.000260966	4.50158e-05
634	0.000144263	0	0	0.000262831	5.04948e-05
635	0.000149449	0	0	0.00026563	5.62897e-05
636	0.000154693	0	0	0.000269337	6.22976e-05
637	0.000159986	0	0	0.000273855	6.83935e-05
638	0.000165327	0	0	0.000279015	7.44335e-05
639	0.000170723	0	0	0.000284581	8.02596e-05
640	0.00017619	0	0	0.000290268	8.57058e-05
641	0.000181746	0	0	0.000295757	9.06047e-05
642	0.000187411	0	0	0.000300721	9.47958e-05
643	0.000193205	0	0	0.000304855	9.81331e-05
644	0.000199139	0	0	0.000307903	0.000100492
645	0.000205213	0	0	0.000309692	0.000101774
646	0.000211415	0	0	0.000310163	0.000101915
647	0.000217715	0	0	0.000309385	0.000100879
648	0.000224065	0	0	0.00030758	9.86668e-05
649	0.000230398	0	0	0.00030511	9.53091e-05
650	0.000236633	0	0	0.000302459	9.08656e-05
651	0.000242679	0	0	0.000300185	8.54221e-05
652	0.000248442	0	0	0.000298845	7.90885e-05
653	0.000253832	0	0	0.000298897	7.19978e-05
654	0.000258774	0	0	0.000300601	6.43049e-05
655	0.000263216	0	0	0.000303925	5.61861e-05
656	0.000267137	0	0	0.000308481	4.78361e-05
657	0.000270545	0	0	0.000313518	3.9463e-05
658	0.000273485	0	0	0.000317987	3.12784e-05
659	0.000276024	0	0	0.000320666	2.34844e-05
660	0.000278249	0	0	0.000320344	1.62577e-05
661	0.000280254	0	0	0.000316013	9.7342e-06
662	0.000282127	0	0	0.000307054	3.99566e-06
663	0.000283781	0	0	0.000293243	0
664	0.000284873	0	0	0.000274741	0
665	0.000286113	0	0	0.000252845	0
666	0.000287489	0	0	0.000228739	0
667	0.000288972	0	0	0.000203745	0
668	0.000290521	0	0	0.000179133	0
669	0.000292094	0	0	0.000155965	0
670	0.000293653	0	0	0.000134998	0
671	0.000295166	0	0	0.000116649	0
672	0.000296612	0	0	0.00010102	0
673	0.000297975	0	0	8.79648e-05	0
674	0.000299245	0	0	7.71761e-05	0
675	0.000300412	0	0	6.8266e-05	0
676	0.000301469	0	0	6.08377e-05	0
677	0.000302405	0	0	5.45321e-05	0
678	0.000303209	0	0	4.90541e-05	0
679	0.000303865	0	0	4.41796e-05	0
680	0.000304358	0	0	3.97507e-05	0
681	0.000304671	0	0	3.56636e-05	0
682	0.000304787	0	0	3.18556e-05	0
683	0.000304688	0	0	2.82915e-05	0
684	0.000304357	0	0	2.49533e-05	0
685	0.00030378	0	0	2.18326e-05	0
686	0.000302942	0	0	1.89253e-05	0
687	0.00030183	0	0	1.62283e-05	0
688	0.000300435	0	0	1.37383e-05	0
689	0.000298746	0	0	1.14506e-05	0
690	0.000296759	0	0	9.35948e-06	0
691	0.000294469	0	0	7.45791e-06	0
692	0.000291875	0	0	5.7382e-06	0
693	0.000288977	0	0	4.19214e-06	0
694	0.000285779	0	0	2.81131e-06	0
695	0.000282286	0	0	1.58727e-06	0
696	0.000278508	0	0	5.11676e-07	0
697	0.000274405	0	0	0	0
698	0.000269996	0	0	0	0
699	0.00026535	0	0	0	0
700	0.000260483	0	0	0	0
701	0.000255411	0	0	0	0
702	0.000250149	0	0	0	0
703	0.000244718	0	0	0	0
704	0.000239135	0	0	0	0
705	0.000233421	0	0	0	0
706	0.000227594	0	0	0	0
707	0.000221676	0	0	0	0
708	0.000215686	0	0	0	0
709	0.000209644	0	0	0	0
710	0.000203378	0	7.81814e-07	0	0
711	0.000197054	0	1.74846e-06	0	0
712	0.000190743	0	2.69005e-06	0	0
713	0.000184462	0	3.60474e-06	0	0
714	0.00017823	0	4.491e-06	0	0
715	0.000172064	0	5.34765e-06	0	0
716	0.00016598	0	6.17382e-06	0	0
717	0.000159993	0	6.96901e-06	0	0
718	0.000154118	0	7.73308e-06	0	0
719	0.000148367	0	8.46624e-06	0	0
720	0.000142753	0	9.16901e-06	0	0
721	0.000137287	0	9.84229e-06	0	0
722	0.000131978	0	1.04873e-05	0	0
723	0.000126835	0	1.11054e-05	0	0
724	0.000121866	0	1.16984e-05	0	0
725	0.000117077	0	1.22681e-05	0	0
726	0.000112473	0	1.28169e-05	0	0
727	0.00010806	0	1.33468e-05	0	0
728	0.000103839	0	1.38602e-05	0	0
729	9.98146e-05	0	1.43596e-05	0	0
730	9.59869e-05	0	1.48474e-05	0	0
731	9.23569e-05	0	1.53261e-05	0	0
732	8.89241e-05	0	1.5798e-05	0	0
733	8.56874e-05	0	1.62654e-05	0	0
734	8.26451e-05	0	1.67306e-05	0	0
735	7.9588e-05	0	1.71568e-05	0	1.16534e-06
736	7.67198e-05	0	1.75847e-05	0	2.32995e-06
737	7.40466e-05	0	1.80181e-05	0	3.43729e-06
738	7.13148e-05	9.07025e-07	1.82208e-05	0	4.3475e-06
739	6.87318e-05	1.94869e-06	1.83966e-05	0	5.18181e-06
740	6.634e-05	2.95068e-06	1.85923e-05	0	5.96878e-06
741	6.41332e-05	3.91427e-06	1.88085e-05	0	6.70991e-06
742	6.2105e-05	4.84085e-06	1.90458e-05	0	7.40681e-06
743	6.02486e-05	5.73189e-06	1.93044e-05	0	8.06126e-06
744	5.85567e-05	6.5889e-06	1.95843e-05	0	8.6751e-06
745	5.70222e-05	7.41342e-06	1.98855e-05	0	9.25029e-06
746	5.56375e-05	8.20702e-06	2.02077e-05	0	9.78882e-06
747	5.4395e-05	8.97123e-06	2.05508e-05	0	1.02927e-05
748	5.32871e-05	9.70752e-06	2.09142e-05	0	1.07641e-05
749	5.2306e-05	1.04173e-05	2.12975e-05	0	1.1205e-05
750	5.1444e-05	1.1102e-05	2.17001e-05	0	1.16175e-05
751	5.06934e-05	1.17628e-05	2.21215e-05	0	1.20036e-05
752	5.00466e-05	1.24009e-05	2.2561e-05	0	1.23653e-05
753	4.94959e-05	1.30173e-05	2.30181e-05	0	1.27046e-05
754	4.90338e-05	1.3613e-05	2.34921e-05	0	1.30234e-05
755	4.8653e-05	1.41886e-05	2.39824e-05	0	1.33236e-05
756	4.83462e-05	1.47449e-05	2.44885e-05	0	1.36068e-05
757	4.81064e-05	1.52824e-05	2.50097e-05	0	1.38748e-05
758	4.79265e-05	1.58014e-05	2.55457e-05	0	1.41292e-05
759	4.77997e-05	1.63023e-05	2.60957e-05	0	1.43716e-05
760	4.77196e-05	1.67851e-05	2.66595e-05	0	1.46034e-05
761	4.76796e-05	1.725e-05	2.72365e-05	0	1.4826e-05
762	4.76737e-05	1.76967e-05	2.78264e-05	0	1.50407e-05
763	4.76957e-05	1.81253e-05	2.84287e-05	0	1.52488e-05
764	4.774e-05	1.85353e-05	2.90431e-05	0	1.54513e-05
765	4.7801e-05	1.89266e-05	2.96693e-05	0	1.56493e-05
766	4.78734e-05	1.92987e-05	3.03069e-05	0	1.58438e-05
767	4.79522e-05	1.96513e-05	3.09556e-05	0	1.60357e-05
768	4.80326e-05	1.99839e-05	3.16152e-05	0	1.62258e-05
769	4.811e-05	2.02962e-05	3.22852e-05	0	1.6415e-05
770	4.81804e-05	2.05876e-05	3.29653e-05	0	1.66038e-05
771	4.82396e-05	2.08578e-05	3.36554e-05	0	1.6793e-05
772	4.8284e-05	2.11065e-05	3.43549e-05	0	1.69831e-05
773	4.83103e-05	2.13333e-05	3.50637e-05	0	1.71746e-05
774	4.83153e-05	2.15381e-05	3.57813e-05	0	1.73679e-05
775	4.82964e-05	2.17205e-05	3.65073e-05	0	1.75636e-05
776	4.82511e-05	2.18807e-05	3.72414e-05	0	1.77618e-05
777	4.81773e-05	2.20187e-05	3.79832e-05	0	1.7963e-05
778	4.80731e-05	2.21345e-05	3.87322e-05	0	1.81673e-05
779	4.79371e-05	2.22286e-05	3.94881e-05	0	1.83751e-05
780	4.77681e-05	2.23014e-05	4.02504e-05	0	1.85864e-05
781	4.75653e-05	2.23535e-05	4.10187e-05	0	1.88014e-05
782	4.73281e-05	2.23857e-05	4.17926e-05	0	1.90203e-05
783	4.70563e-05	2.23991e-05	4.25718e-05	0	1.92431e-05
784	4.675e-05	2.23949e-05	4.3356e-05	0	1.947e-05
785	4.64095e-05	2.23747e-05	4.4145e-05	0	1.97009e-05
786	4.60357e-05	2.23404e-05	4.49388e-05	0	1.99361e-05
787	4.56293e-05	2.22939e-05	4.57374e-05	0	2.01757e-05
788	4.51917e-05	2.22379e-05	4.65412e-05	0	2.04197e-05
789	4.47244e-05	2.21754e-05	4.73509e-05	0	2.06683e-05
790	4.42291e-05	2.21095e-05	4.81675e-05	0	2.09218e-05
791	4.37077e-05	2.20441e-05	4.89927e-05	0	2.11803e-05
792	4.31625e-05	2.19833e-05	4.98287e-05	0	2.14443e-05
793	4.25958e-05	2.19316e-05	5.06788e-05	0	2.17139e-05
794	4.20099e-05	2.18936e-05	5.15476e-05	0	2.19896e-05
795	4.14073e-05	2.18741e-05	5.24413e-05	0	2.22717e-05
796	4.07903e-05	2.18778e-05	5.3368e-05	0	2.25603e-05
797	4.0161e-05	2.19086e-05	5.43389e-05	0	2.28556e-05
798	3.95214e-05	2.19698e-05	5.53684e-05	0	2.31575e-05
799	3.88727e-05	2.20631e-05	5.64751e-05	0	2.34654e-05
800	3.82156e-05	2.21884e-05	5.76829e-05	0	2.37785e-05
801	3.75499e-05	2.23427e-05	5.90216e-05	0	2.4095e-05
802	3.68742e-05	2.252e-05	6.05277e-05	0	2.44127e-05
803	3.61863e-05	2.27105e-05	6.22448e-05	0	2.47285e-05
804	3.54822e-05	2.29005e-05	6.42234e-05	0	2.50382e-05
805	3.47571e-05	2.30715e-05	6.65207e-05	0	2.53369e-05
806	3.40048e-05	2.32015e-05	6.91982e-05	0	2.56186e-05
807	3.32183e-05	2.32647e-05	7.23194e-05	0	2.58765e-05
808	3.239e-05	2.32328e-05	7.59456e-05	0	2.61038e-05
809	3.15127e-05	2.30772e-05	8.01308e-05	0	2.62931e-05
810	3.05799e-05	2.27701e-05	8.49153e-05	0	2.64379e-05
811	2.95872e-05	2.22877e-05	9.03189e-05	0	2.65325e-05
812	2.85326e-05	2.16125e-05	9.63335e-05	0	2.6573e-05
813	2.7418e-05	2.0736e-05	0.000102917	0	2.65577e-05
814	2.62496e-05	1.96609e-05	0.000109988	0	2.64879e-05
815	2.50384e-05	1.84029e-05	0.000117423	0	2.63681e-05
816	2.38005e-05	1.69912e-05	0.000125059	0	2.62063e-05
817	2.25566e-05	1.54687e-05	0.000132692	0	2.60134e-05
818	2.13093e-05	1.3764e-05	0.00013992	1.0589e-06	2.57632e-05
819	1.99538e-05	1.11962e-05	0.000145465	9.43562e-06	2.5233e-05
820	1.86939e-05	8.82141e-06	0.000150441	1.68305e-05	2.47569e-05
821	1.75644e-05	6.7476e-06	0.000154666	2.29191e-05	2.43647e-05
822	1.65964e-05	5.07365e-06	0.00015798	2.74194e-05	2.40834e-05
823	1.58155e-05	3.88186e-06	0.000160262	3.01133e-05	2.39353e-05
824	1.52393e-05	3.23177e-06	0.000161433	3.08634e-05	2.3936e-05
825	1.48765e-05	3.15579e-06	0.000161471	2.9625e-05	2.40938e-05
826	1.47262e-05	3.65699e-06	0.000160403	2.64493e-05	2.44086e-05
827	1.47782e-05	4.70941e-06	0.000158312	2.14807e-05	2.48722e-05
828	1.50136e-05	6.26068e-06	0.000155326	1.4945e-05	2.54694e-05
829	1.54067e-05	8.23673e-06	0.000151608	7.13283e-06	2.61787e-05
830	1.58928e-05	1.03551e-05	0.00014708	0	2.69129e-05
831	1.63103e-05	1.17924e-05	0.000140939	0	2.74115e-05
832	1.67838e-05	1.33391e-05	0.000134608	0	2.79323e-05
833	1.72891e-05	1.49399e-05	0.000128325	0	2.84614e-05
834	1.78045e-05	1.6545e-05	0.000122292	0	2.89865e-05
835	1.83123e-05	1.8113e-05	0.000116678	0	2.94975e-05
836	1.87991e-05	1.9612e-05	0.000111603	0	2.99865e-05
837	1.92558e-05	2.10203e-05	0.000107147	0	3.04484e-05
838	1.96779e-05	2.23263e-05	0.000103348	0	3.08804e-05
839	2.00644e-05	2.35268e-05	0.000100208	0	3.12819e-05
840	2.04175e-05	2.46262e-05	9.76992e-05	0	3.1654e-05
841	2.07419e-05	2.56344e-05	9.57738e-05	0	3.1999e-05
842	2.10435e-05	2.65649e-05	9.437e-05	0	3.23201e-05
843	2.13295e-05	2.74338e-05	9.34188e-05	0	3.26209e-05
844	2.1607e-05	2.82577e-05	9.285e-05	0	3.29051e-05
845	2.18832e-05	2.90528e-05	9.25964e-05	0	3.31761e-05
846	2.21644e-05	2.98346e-05	9.25965e-05	0	3.34368e-05
847	2.24563e-05	3.06165e-05	9.27969e-05	0	3.36899e-05
848	2.27638e-05	3.14102e-05	9.31524e-05	0	3.39375e-05
849	2.30903e-05	3.22256e-05	9.36262e-05	0	3.41809e-05
850	2.34388e-05	3.30701e-05	9.41888e-05	0	3.44215e-05
851	2.38108e-05	3.39494e-05	9.48179e-05	0	3.46599e-05
852	2.42071e-05	3.48675e-05	9.54963e-05	0	3.48968e-05
853	2.46275e-05	3.58264e-05	9.62115e-05	0	3.51325e-05
854	2.50711e-05	3.68269e-05	9.6954e-05	0	3.53675e-05
855	2.55361e-05	3.78681e-05	9.77172e-05	0	3.56021e-05
856	2.60198e-05	3.89479e-05	9.84958e-05	0	3.58367e-05
857	2.65193e-05	4.00633e-05	9.92859e-05	0	3.60718e-05
858	2.70307e-05	4.121e-05	0.000100085	0	3.6308e-05
859	2.755e-05	4.23832e-05	0.000100889	0	3.65459e-05
860	2.80728e-05	4.35773e-05	0.000101698	0	3.67863e-05
861	2.85946e-05	4.47865e-05	0.000102509	0	3.70299e-05
862	2.91109e-05	4.60049e-05	0.000103321	0	3.72774e-05
863	2.96174e-05	4.72265e-05	0.000104135	0	3.75293e-05
864	3.01101e-05	4.84458e-05	0.000104952	0	3.7786e-05
865	3.05855e-05	4.96577e-05	0.000105772	0	3.80479e-05
866	3.10408e-05	5.08577e-05	0.000106599	0	3.83149e-05
867	3.14737e-05	5.20424e-05	0.000107437	0	3.85867e-05
868	3.1883e-05	5.32091e-05	0.000108292	0	3.88629e-05
869	3.22679e-05	5.43557e-05	0.000109171	0	3.91427e-05
870	3.26286e-05	5.54814e-05	0.00011008	0	3.94252e-05
871	3.29659e-05	5.65858e-05	0.00011103	0	3.97092e-05
872	3.32812e-05	5.76692e-05	0.00011203	0	3.99936e-05
873	3.35763e-05	5.87321e-05	0.00011309	0	4.02772e-05
874	3.38534e-05	5.97755e-05	0.000114222	0	4.05588e-05
875	3.41148e-05	6.08e-05	0.000115437	0	4.08375e-05
876	3.43629e-05	6.18063e-05	0.000116745	0	4.11125e-05
877	3.46e-05	6.27945e-05	0.000118158	0	4.13832e-05
878	3.48279e-05	6.37642e-05	0.000119685	0	4.16495e-05
879	3.50483e-05	6.47144e-05	0.000121337	0	4.19116e-05
880	3.52624e-05	6.56433e-05	0.000123121	0	4.21698e-05
881	3.54708e-05	6.65487e-05	0.000125047	0	4.2425e-05
882	3.56738e-05	6.74275e-05	0.000127121	0	4.26783e-05
883	3.5871e-05	6.82762e-05	0.000129351	0	4.2931e-05
884	3.60616e-05	6.90909e-05	0.000131741	0	4.31846e-05
885	3.62446e-05	6.98675e-05	0.000134296	0	4.34407e-05
886	3.64182e-05	7.06017e-05	0.000137022	0	4.37009e-05
887	3.65806e-05	7.12894e-05	0.000139923	0	4.39669e-05
888	3.67296e-05	7.19269e-05	0.000143002	0	4.424e-05
889	3.68631e-05	7.25107e-05	0.000146262	0	4.45216e-05
890	3.69785e-05	7.30381e-05	0.000149708	0	4.48126e-05
891	3.70733e-05	7.35071e-05	0.000153342	0	4.51139e-05
892	3.7145e-05	7.39165e-05	0.000157168	0	4.54256e-05
893	3.71911e-05	7.4266e-05	0.000161188	0	4.5748e-05
894	3.72091e-05	7.45566e-05	0.000165406	0	4.60804e-05
895	3.71964e-05	7.479e-05	0.000169824	0	4.64222e-05
896	3.71508e-05	7.49694e-05	0.000174446	0	4.67722e-05
897	3.70699e-05	7.50987e-05	0.000179274	0	4.71286e-05
898	3.69514e-05	7.51831e-05	0.00018431	0	4.74895e-05
899	3.67932e-05	7.52291e-05	0.000189558	0	4.78526e-05
900	3.65932e-05	7.52437e-05	0.000195021	0	4.82149e-05
901	3.63493e-05	7.5235e-05	0.0002007	0	4.85735e-05
902	3.60004e-05	7.48786e-05	0.000206142	2.79854e-06	4.88182e-05
903	3.55101e-05	7.3989e-05	0.000211081	1.0032e-05	4.88829e-05
904	3.4973e-05	7.31203e-05	0.000216278	1.71139e-05	4.89389e-05
905	3.43879e-05	7.22868e-05	0.00022175	2.39932e-05	4.89842e-05
906	3.37536e-05	7.15015e-05	0.000227516	3.06207e-05	4.90169e-05
907	3.30684e-05	7.07753e-05	0.000233601	3.69488e-05	4.90349e-05
908	3.23305e-05	7.01168e-05	0.000240033	4.29297e-05	4.90365e-05
909	3.15375e-05	6.95314e-05	0.000246846	4.85146e-05	4.90204e-05
910	3.06868e-05	6.9021e-05	0.000254081	5.36519e-05	4.89859e-05
911	2.97753e-05	6.85835e-05	0.000261787	5.82866e-05	4.89334e-05
912	2.87996e-05	6.82125e-05	0.000270021	6.2359e-05	4.8864e-05
913	2.7756e-05	6.78973e-05	0.000278846	6.58044e-05	4.87805e-05
914	2.66408e-05	6.76232e-05	0.000288333	6.85537e-05	4.86869e-05
915	2.54502e-05	6.73721e-05	0.000298557	7.0534e-05	4.85891e-05
916	2.4181e-05	6.71238e-05	0.000309593	7.16711e-05	4.84945e-05
917	2.28307e-05	6.68573e-05	0.000321513	7.18927e-05	4.84125e-05
918	2.13979e-05	6.65528e-05	0.00033438	7.11322e-05	4.8354e-05
919	1.98829e-05	6.61944e-05	0.000348241	6.93343e-05	4.83317e-05
920	1.82878e-05	6.57724e-05	0.00036312	6.64609e-05	4.83594e-05
921	1.66175e-05	6.52864e-05	0.000379012	6.24973e-05	4.84519e-05
922	1.48792e-05	6.47476e-05	0.000395872	5.74587e-05	4.8625e-05
923	1.30832e-05	6.41814e-05	0.000413613	5.13962e-05	4.88944e-05
924	1.12424e-05	6.36291e-05	0.000432097	4.4402e-05	4.92754e-05
925	9.37242e-06	6.31486e-05	0.000451138	3.66119e-05	4.97828e-05
926	7.49056e-06	6.28146e-05	0.000470496	2.82073e-05	5.04299e-05
927	5.61535e-06	6.27173e-05	0.000489889	1.94135e-05	5.12283e-05
928	3.76531e-06	6.29597e-05	0.000508992	1.04956e-05	5.21874e-05
929	1.95777e-06	6.36545e-05	0.000527453	1.75141e-06	5.33143e-05
930	7.04282e-08	6.41467e-05	0.000543839	0	5.43653e-05
931	0	6.4683e-05	0.000558614	0	5.50305e-05
932	0	6.61663e-05	0.000571866	0	5.5921e-05
933	0	6.87599e-05	0.000583343	0	5.70683e-05
934	0	7.25854e-05	0.000592841	0	5.84775e-05
935	0	7.77388e-05	0.000600215	0	6.01479e-05
936	0	8.42869e-05	0.000605397	0	6.20734e-05
937	0	9.22651e-05	0.00060839	0	6.42425e-05
938	0	0.000101677	0.000609279	0	6.66387e-05
939	0	0.000112498	0.000608226	0	6.92415e-05
940	0	0.000124671	0.000605461	0	7.2027e-05
941	0	0.000136725	0.000599434	1.1125e-05	7.44745e-05
942	0	0.000149549	0.000591788	2.54713e-05	7.69064e-05
943	0	0.000163206	0.000583139	4.15518e-05	7.93585e-05
944	0	0.000177586	0.00057391	5.91396e-05	8.18096e-05
945	0	0.000192561	0.000564529	7.80064e-05	8.42367e-05
946	0	0.000207983	0.000555414	9.79383e-05	8.6615e-05
947	0	0.000223681	0.000546957	0.000118748	8.89167e-05
948	0	0.000239463	0.000539515	0.000140286	9.11099e-05
949	0	0.000255112	0.000533403	0.000162445	9.31587e-05
950	0	0.000270389	0.000528891	0.000185166	9.50228e-05
951	0	0.000285038	0.000526198	0.000208435	9.6658e-05
952	0	0.000298793	0.000525499	0.000232275	9.80173e-05
953	0	0.00031139	0.000526922	0.000256741	9.90523e-05
954	0	0.000322577	0.000530553	0.000281906	9.97156e-05
955	0	0.000332132	0.000536444	0.000307851	9.99628e-05
956	0	0.000339877	0.00054461	0.000334645	9.97557e-05
957	0	0.000345688	0.000555038	0.00036234	9.90641e-05
958	0	0.00034951	0.000567691	0.000390954	9.78681e-05
959	0	0.000351359	0.000582511	0.000420466	9.61603e-05
960	0	0.000351329	0.000599419	0.000450812	9.39458e-05
961	0	0.000349583	0.000618323	0.000481881	9.12432e-05
962	0	0.000346344	0.000639115	0.000513524	8.80837e-05
963	0	0.000341887	0.000661675	0.000545552	8.45099e-05
964	0	0.000336515	0.000685875	0.000577753	8.05739e-05
965	0	0.000330547	0.000711576	0.000609899	7.63354e-05
966	0	0.000324297	0.000738632	0.000641754	7.1859e-05
967	0	0.000318056	0.00076689	0.000673093	6.72121e-05
968	0	0.00031208	0.000796192	0.000703706	6.24626e-05
969	0	0.000306582	0.000826374	0.000733408	5.76768e-05
970	0	0.00030172	0.000857271	0.000762048	5.29182e-05
971	0	0.000297599	0.000888714	0.000789507	4.82458e-05
972	0	0.000294274	0.000920535	0.000815708	4.37135e-05
973	0	0.000291752	0.000952571	0.000840608	3.93692e-05
974	0	0.000289999	0.00098466	0.000864199	3.5255e-05
975	0	0.000288953	0.00101665	0.000886505	3.14064e-05
976	0	0.000288526	0.0010484	0.00090758	2.78524e-05
977	0	0.000288618	0.00107978	0.0009275	2.46157e-05
978	0	0.00028912	0.00111066	0.00094636	2.17129e-05
979	0	0.000289923	0.00114096	0.000964273	1.91541e-05
980	0	0.000290918	0.00117059	0.000981365	1.69438e-05
981	0	0.000292003	0.00119948	0.000997774	1.50808e-05
982	0	0.000293083	0.00122758	0.00101365	1.35585e-05
983	0	0.000294065	0.00125486	0.00102914	1.23659e-05
984	0	0.000294866	0.00128129	0.00104442	1.1488e-05
985	0	0.000295405	0.00130687	0.00105964	1.09063e-05
986	0	0.000295605	0.00133159	0.00107498	1.05999e-05
987	0	0.000295394	0.00135548	0.00109061	1.05466e-05
988	0	0.000294701	0.00137855	0.00110669	1.07233e-05
989	0	0.000293461	0.00140083	0.00112337	1.11074e-05
990	0	0.000291612	0.00142235	0.0011408	1.16773e-05
991	0	0.000289102	0.00144317	0.0011591	1.24134e-05
992	0	0.000285885	0.00146333	0.00117836	1.32989e-05
993	0	0.00028193	0.0014829	0.00119865	1.43197e-05
994	0	0.00027722	0.00150194	0.00122	1.54652e-05
995	0	0.000271752	0.00152053	0.00124242	1.67282e-05
996	0	0.000265543	0.00153876	0.00126586	1.81045e-05
997	0	0.000258629	0.00155672	0.00129024	1.95932e-05
998	0	0.000251064	0.00157451	0.00131545	2.11954e-05
999	0	0.000242923	0.00159222	0.00134135	2.29143e-05
1000	0	0.000234297	0.00160995	0.00136776	2.47539e-05
1001	0	0.00022529	0.0016278	0.0013945	2.67185e-05
1002	0	0.000216023	0.00164585	0.00142135	2.88119e-05
1003	0	0.000206622	0.00166418	0.0014481	3.10367e-05
1004	0	0.000197222	0.00168285	0.00147454	3.33936e-05
1005	0	0.00018796	0.00170192	0.00150048	3.58809e-05
1006	0	0.000178969	0.00172141	0.0015257	3.84944e-05
1007	0	0.000170381	0.00174134	0.00155005	4.12269e-05
1008	0	0.000162319	0.0017617	0.00157338	4.40687e-05
1009	0	0.000154893	0.00178249	0.00159555	4.70075e-05
1010	0	0.000148203	0.00180366	0.00161646	5.00287e-05
1011	0	0.000142333	0.00182517	0.00163606	5.31163e-05
1012	0	0.000137348	0.00184696	0.00165428	5.62533e-05
1013	0	0.000133297	0.00186897	0.00167112	5.94221e-05
1014	0	0.000130211	0.00189113	0.00168656	6.26059e-05
1015	0	0.0001281	0.00191337	0.00170063	6.57886e-05
1016	0	0.000126957	0.00193564	0.00171336	6.89559e-05
1017	0	0.000126757	0.00195786	0.0017248	7.20959e-05
1018	0	0.000127457	0.00197999	0.00173501	7.51994e-05
1019	0	0.000128997	0.00200198	0.00174404	7.82604e-05
1020	0	0.000131305	0.00202382	0.00175198	8.12764e-05
1021	0	0.000134295	0.00204547	0.00175888	8.42491e-05
1022	0	0.000137873	0.00206695	0.00176482	8.71851e-05
1023	0	0.000141934	0.00208826	0.00176987	9.00974e-05
1024	0	0.000146371	0.00210941	0.00177414	9.30076e-05
1025	0	0.000151074	0.00213042	0.00177772	9.59499e-05
1026	0	0.000155934	0.00215133	0.00178077	9.89777e-05
1027	0	0.000160847	0.00217214	0.0017835	0.000102172
1028	0	0.000165715	0.00219285	0.00178623	0.000105652
1029	0	0.000170453	0.00221343	0.0017894	0.000109588
1030	0	0.00017499	0.00223382	0.00179361	0.000114211
1031	0	0.000179278	0.00225389	0.00179963	0.000119817
1032	0	0.000183291	0.0022735	0.00180837	0.000126757
1033	0	0.000187038	0.00229247	0.00182082	0.00013541
1034	0	0.00019057	0.00231062	0.00183785	0.000146133
1035	0	0.000193992	0.00232779	0.00186005	0.000159183
1036	0	0.000197471	0.00234392	0.00188741	0.000174632
1037	0	0.000201253	0.00235907	0.00191912	0.00019227
1038	0	0.000205669	0.00237349	0.0019533	0.000211546
1039	0	0.000211139	0.00238756	0.00198705	0.00023154
1040	0	0.000218162	0.00240186	0.00201653	0.000251017
1041	0	0.000227295	0.002417	0.00203735	0.000268544
1042	0	0.000239106	0.00243361	0.00204515	0.000282679
1043	0	0.000254113	0.00245218	0.00203625	0.000292183
1044	0	0.000272698	0.00247296	0.00200825	0.000296224
1045	0	0.000295025	0.00249591	0.00196047	0.000294527
1046	0	0.000320953	0.0025207	0.00189412	0.000287427
1047	0	0.000349971	0.00254674	0.00181215	0.000275822
1048	0	0.000381187	0.00257328	0.00171884	0.000261031
1049	0	0.000413354	0.00259952	0.00161915	0.000244592
1050	0	0.000444972	0.00262471	0.0015181	0.000228041
1051	0	0.000474431	0.00264826	0.00142017	0.000212725
1052	0	0.000500199	0.00266976	0.00132886	0.000199655
1053	0	0.000521013	0.00268899	0.00124652	0.000189448
1054	0	0.000536034	0.00270586	0.0011743	0.000182326
1055	0	0.000544962	0.0027204	0.00111233	0.000178166
1056	0	0.000548055	0.00273266	0.00105993	0.000176591
1057	5.65329e-06	0.000544422	0.00274247	0.00101548	0.000175409
1058	1.14282e-05	0.000536825	0.00275008	0.000977876	0.000175642
1059	1.70029e-05	0.00052671	0.0027555	0.000945576	0.0001768
1060	2.23402e-05	0.000515459	0.00275873	0.000917095	0.000178381
1061	2.73977e-05	0.000504311	0.00275975	0.000891131	0.00017999
1062	3.21341e-05	0.000494242	0.0027586	0.000866611	0.000181357
1063	3.65129e-05	0.000485895	0.00275531	0.000842697	0.000182331
1064	4.05055e-05	0.000479582	0.00274998	0.000818765	0.000182867
1065	4.40913e-05	0.000475322	0.00274274	0.000794367	0.000183006
1066	4.72558e-05	0.000472922	0.00273374	0.000769182	0.000182847
1067	4.99867e-05	0.000472072	0.00272318	0.000742972	0.000182524
1068	5.22692e-05	0.000472438	0.00271125	0.000715533	0.000182182
1069	5.40797e-05	0.000473743	0.00269817	0.000686668	0.000181959
1070	5.53807e-05	0.000475828	0.00268418	0.00065616	0.000181979
1071	5.61177e-05	0.000478686	0.00266951	0.000623761	0.000182335
1072	5.62198e-05	0.000482468	0.0026544	0.0005892	0.000183093
1073	5.56061e-05	0.000487453	0.00263911	0.000552203	0.000184291
1074	5.42007e-05	0.000493998	0.00262387	0.000512533	0.000185943
1075	5.19553e-05	0.000502442	0.00260887	0.000470049	0.000188048
1076	4.88786e-05	0.000513008	0.00259423	0.00042477	0.000190595
1077	4.50683e-05	0.000525696	0.00257997	0.000376936	0.000193576
1078	4.07384e-05	0.000540192	0.00256602	0.000327056	0.000196994
1079	3.62314e-05	0.000555837	0.00255216	0.000275905	0.000200863
1080	3.20102e-05	0.000571651	0.00253809	0.000224487	0.000205216
1081	2.862e-05	0.000586438	0.00252347	0.000173941	0.000210094
1082	2.66228e-05	0.000598947	0.00250794	0.000125427	0.000215538
1083	2.65105e-05	0.000608067	0.00249119	8.00029e-05	0.000221576
1084	2.86113e-05	0.000613008	0.002473	3.85435e-05	0.000228201
1085	3.30097e-05	0.000613428	0.0024532	1.70621e-06	0.000235363
1086	3.88676e-05	0.000605897	0.00242672	0	0.000241813
1087	4.64106e-05	0.000595009	0.00239899	0	0.000248685
1088	5.4975e-05	0.000581897	0.00237018	0	0.000255857
1089	6.37538e-05	0.000567643	0.00234021	0	0.000263121
1090	7.19702e-05	0.000553328	0.00230902	0	0.000270267
1091	7.9007e-05	0.000539899	0.00227669	0	0.000277106
1092	8.4498e-05	0.00052809	0.00224345	0	0.000283482
1093	8.83594e-05	0.000518387	0.00220973	0	0.000289285
1094	9.07597e-05	0.000511034	0.00217609	0	0.000294441
1095	9.20407e-05	0.000506067	0.00214314	0	0.000298913
1096	9.26163e-05	0.000503362	0.00211149	0	0.000302688
1097	9.28779e-05	0.000502683	0.0020816	0	0.000305767
1098	9.31267e-05	0.000503729	0.00205375	0	0.000308162
1099	9.35431e-05	0.000506182	0.00202806	0	0.000309887
1100	9.41888e-05	0.000509731	0.00200447	0	0.000310963
1101	9.50325e-05	0.000514104	0.00198281	0	0.000311417
1102	9.58383e-05	0.000518258	0.00196172	6.9183e-06	0.000311023
1103	9.65142e-05	0.000522162	0.00194116	1.96092e-05	0.000309872
1104	9.70548e-05	0.00052634	0.00192178	3.27582e-05	0.000308229
1105	9.73571e-05	0.000530735	0.00190341	4.6334e-05	0.000306173
1106	9.73409e-05	0.000535344	0.00188592	6.02006e-05	0.000303797
1107	9.69496e-05	0.000540203	0.00186923	7.41379e-05	0.00030121
1108	9.61481e-05	0.000545377	0.00185329	8.78689e-05	0.000298532
1109	9.4919e-05	0.000550948	0.00183808	0.000101088	0.000295891
1110	9.32596e-05	0.000557007	0.00182358	0.000113489	0.000293418
1111	9.11784e-05	0.000563641	0.0018098	0.000124787	0.000291241
1112	8.86927e-05	0.000570929	0.00179672	0.000134739	0.000289487
1113	8.58258e-05	0.000578935	0.00178434	0.000143163	0.000288275
1114	8.26053e-05	0.000587705	0.00177264	0.000149948	0.000287712
1115	7.90609e-05	0.000597259	0.0017616	0.000155061	0.000287895
1116	7.52232e-05	0.000607596	0.00175119	0.000158553	0.000288908
1117	7.1122e-05	0.00061869	0.00174136	0.000160556	0.00029082
1118	6.67859e-05	0.00063049	0.00173206	0.000161272	0.000293684
1119	6.22413e-05	0.000642926	0.00172324	0.000160966	0.000297543
1120	5.75125e-05	0.000655913	0.00171482	0.000159948	0.000302425
1121	5.26213e-05	0.000669356	0.00170674	0.000158554	0.000308344
1122	4.75872e-05	0.000683153	0.00169893	0.000157126	0.000315306
1123	4.24275e-05	0.000697204	0.00169132	0.000155994	0.000323306
1124	3.71574e-05	0.000711419	0.00168386	0.000155454	0.000332331
1125	3.17904e-05	0.000725717	0.00167648	0.000155753	0.000342359
1126	2.63377e-05	0.000740036	0.00166916	0.000157075	0.00035336
1127	2.08084e-05	0.000754331	0.00166187	0.000159528	0.000365301
1128	1.52094e-05	0.000768578	0.0016546	0.000163146	0.000378138
1129	9.54548e-06	0.000782773	0.00164738	0.00016788	0.000391821
1130	3.81879e-06	0.000796925	0.00164023	0.000173611	0.000406293
1131	0	0.000810477	0.00163314	0.00018001	0.000420913
1132	0	0.00082289	0.00162611	0.000186703	0.000435046
1133	0	0.000835298	0.00161939	0.000193687	0.000449731
1134	0	0.000847699	0.0016131	0.000200672	0.000464878
1135	0	0.000860065	0.00160736	0.000207366	0.000480392
1136	0	0.000872335	0.00160234	0.000213504	0.000496167
1137	0	0.000884406	0.00159819	0.000218861	0.000512099
1138	0	0.00089613	0.00159508	0.000223271	0.000528075
1139	0	0.000907315	0.00159317	0.000226639	0.000543986
1140	0	0.000917731	0.00159262	0.000228954	0.000559722
1141	0	0.000927114	0.00159355	0.000230287	0.000575175
1142	0	0.000935185	0.00159607	0.000230791	0.000590242
1143	0	0.000941661	0.00160025	0.000230692	0.000604822
1144	0	0.000946277	0.00160611	0.000230277	0.000618819
1145	0	0.000948804	0.00161362	0.000229871	0.000632136
1146	0	0.000949066	0.0016227	0.000229819	0.000644677
1147	0	0.000946957	0.00163318	0.000230456	0.000656339
1148	0	0.000942451	0.00164485	0.000232091	0.000667014
1149	0	0.000935607	0.00165745	0.000234975	0.000676586
1150	0	0.000926571	0.00167066	0.000239286	0.000684927
1151	0	0.000915566	0.00168413	0.000245119	0.000691897
1152	0	0.000902883	0.00169748	0.000252471	0.000697351
1153	0	0.000888866	0.00171034	0.00026125	0.000701138
1154	0	0.000873889	0.00172233	0.000271276	0.00070311
1155	0	0.000858338	0.00173312	0.000282298	0.00070313
1156	0	0.000842594	0.00174243	0.000294016	0.000701081
1157	0	0.000827006	0.00175002	0.000306104	0.000696874
1158	0	0.000811885	0.00175573	0.000318236	0.000690461
1159	0	0.000797483	0.00175947	0.000330109	0.000681839
1160	0	0.000783991	0.00176124	0.000341472	0.000671054
1161	0	0.000771532	0.00176109	0.000352139	0.000658205
1162	0	0.000760162	0.00175913	0.000362006	0.000643442
1163	0	0.000749874	0.00175555	0.00037105	0.000626958
1164	0	0.000740601	0.00175054	0.000379334	0.000608984
1165	0	0.000732234	0.00174436	0.000386993	0.000589779
1166	0	0.000724622	0.00173723	0.000394223	0.000569613
1167	0	0.000717594	0.00172939	0.000401263	0.000548762
1168	0	0.000710964	0.00172108	0.00040837	0.000527492
1169	0	0.000704548	0.00171247	0.000415804	0.000506051
1170	0	0.000698172	0.00170373	0.000423802	0.000484661
1171	0	0.000691683	0.00169499	0.000432566	0.000463514
1172	0	0.000684958	0.00168632	0.000442245	0.000442769
1173	0	0.000677906	0.00167776	0.000452931	0.000422553
1174	0	0.000670475	0.00166931	0.00046465	0.000402963
1175	0	0.00066265	0.00166096	0.000477368	0.00038407
1176	0	0.000654451	0.00165264	0.000490989	0.000365923
1177	0	0.000645932	0.00164427	0.000505368	0.000348557
1178	0	0.000637174	0.00163577	0.000520315	0.000331995
1179	0	0.000628281	0.00162703	0.000535615	0.000316254
1180	0	0.000619368	0.00161795	0.000551029	0.000301347
1181	0	0.000610564	0.00160842	0.000566313	0.000287287
1182	0	0.000601998	0.00159834	0.000581225	0.00027409
1183	0	0.000593799	0.00158762	0.000595536	0.000261769
1184	0	0.000586091	0.00157618	0.000609035	0.000250342
1185	0	0.000578993	0.00156396	0.000621536	0.000239824
1186	0	0.000572617	0.00155091	0.000632882	0.00023023
1187	0	0.000567071	0.00153697	0.000642945	0.000221572
1188	0	0.000562456	0.00152212	0.000651627	0.000213855
1189	0	0.000558874	0.00150635	0.00065886	0.000207078
1190	0	0.000556425	0.00148966	0.0006646	0.000201232
1191	0	0.000555211	0.00147205	0.000668825	0.000196296
1192	0	0.000555338	0.00145355	0.000671532	0.000192241
1193	0	0.000556911	0.00143419	0.000672731	0.000189023
1194	0	0.000560036	0.001414	0.00067244	0.000186585
1195	0	0.000564812	0.00139304	0.000670683	0.000184861
1196	0	0.00057133	0.00137138	0.000667484	0.00018377
1197	0	0.000579659	0.00134908	0.000662869	0.000183219
1198	0	0.000589841	0.00132624	0.000656861	0.000183106
1199	0	0.000601882	0.00130295	0.00064948	0.000183319
1200	0	0.000615742	0.00127934	0.000640746	0.00018374
1201	0	0.000631328	0.00125553	0.00063068	0.000184246
1202	0	0.000648486	0.00123168	0.000619304	0.000184712
1203	0	0.000667002	0.00120795	0.000606644	0.000185018
1204	0	0.0006866	0.00118451	0.000592735	0.000185046
1205	0	0.000706953	0.00116156	0.000577616	0.00018469
1206	0	0.000727687	0.00113929	0.000561338	0.000183859
1207	0	0.0007484	0.0011179	0.000543958	0.000182476
1208	0	0.000768676	0.00109757	0.00052554	0.00018049
1209	0	0.000788108	0.00107848	0.000506156	0.000177872
1210	0	0.000806312	0.00106079	0.000485882	0.000174619
1211	0	0.00082295	0.00104462	0.000464796	0.000170755
1212	0	0.000837743	0.00103006	0.000442981	0.000166333
1213	3.7936e-06	0.00084937	0.00101703	0.000420253	0.000160315
1214	8.23425e-06	0.000858619	0.00100564	0.000396926	0.000153723
1215	1.31756e-05	0.000865474	0.000995854	0.000373111	0.000146715
1216	1.85886e-05	0.000869954	0.00098758	0.000348916	0.000139427
1217	2.44312e-05	0.000872147	0.000980679	0.000324465	0.000132004
1218	3.06505e-05	0.00087219	0.000974969	0.000299899	0.000124595
1219	3.71858e-05	0.000870258	0.000970232	0.000275376	0.000117345
1220	4.39707e-05	0.000866551	0.000966221	0.000251071	0.00011039
1221	5.09361e-05	0.000861279	0.000962668	0.000227177	0.000103849
1222	5.80119e-05	0.00085465	0.000959297	0.000203901	9.78229e-05
1223	6.51287e-05	0.000846865	0.000955831	0.000181459	9.239e-05
1224	7.22185e-05	0.000838114	0.000952003	0.000160069	8.76061e-05
1225	7.92155e-05	0.000828574	0.000947567	0.000139943	8.35039e-05
1226	8.60558e-05	0.000818412	0.000942304	0.000121282	8.00948e-05
1227	9.26775e-05	0.000807788	0.000936032	0.000104268	7.7371e-05
1228	9.90196e-05	0.00079686	0.000928609	8.90548e-05	7.53088e-05
1229	0.000105022	0.000785788	0.000919937	7.57675e-05	7.38714e-05
1230	0.000110626	0.000774737	0.000909964	6.44966e-05	7.30129e-05
1231	0.000115772	0.000763881	0.000898683	5.52982e-05	7.26805e-05
1232	0.000120403	0.000753403	0.000886128	4.81946e-05	7.2818e-05
1233	0.000124462	0.000743491	0.000872375	4.31772e-05	7.33676e-05
1234	0.000127896	0.00073434	0.000857529	4.02103e-05	7.42718e-05
1235	0.000130654	0.000726143	0.000841725	3.92355e-05	7.54744e-05
1236	0.000132693	0.000719086	0.000825117	4.01759e-05	7.6922e-05
1237	0.000133974	0.000713346	0.000807873	4.29408e-05	7.85639e-05
1238	0.000134469	0.000709075	0.000790166	4.74274e-05	8.03536e-05
1239	0.00013416	0.000706402	0.000772172	5.35228e-05	8.22488e-05
1240	0.000133041	0.000705417	0.000754062	6.1103e-05	8.42121e-05
1241	0.000131118	0.000706172	0.000735999	7.00311e-05	8.62124e-05
1242	0.000128412	0.000708667	0.000718136	8.01539e-05	8.82254e-05
1243	0.000124955	0.000712852	0.000700617	9.12974e-05	9.02351e-05
1244	0.000120798	0.000718622	0.000683571	0.000103263	9.22344e-05
1245	0.000115999	0.000725814	0.000667117	0.000115822	9.42266e-05
1246	0.000110633	0.000734211	0.000651363	0.000128717	9.62249e-05
1247	0.00010478	0.000743548	0.00063641	0.000141658	9.82533e-05
1248	9.85314e-05	0.000753517	0.000622348	0.000154329	0.000100345
1249	9.19813e-05	0.000763779	0.00060926	0.00016639	0.000102542
1250	8.52262e-05	0.000773981	0.000597223	0.000177491	0.00010489
1251	7.83615e-05	0.000783763	0.000586303	0.00018728	0.00010744
1252	7.14786e-05	0.000792784	0.000576558	0.000195418	0.00011024
1253	6.46616e-05	0.000800731	0.000568036	0.000201596	0.000113335
1254	5.79851e-05	0.000807338	0.000560768	0.000205547	0.000116762
1255	5.15126e-05	0.000812397	0.000554774	0.000207065	0.000120546
1256	4.52943e-05	0.000815765	0.000550051	0.000206011	0.000124699
1257	3.93672e-05	0.000817375	0.000546582	0.000202327	0.000129216
1258	3.37547e-05	0.000817228	0.000544326	0.000196038	0.000134076
1259	2.84674e-05	0.000815397	0.000543221	0.000187253	0.000139243
1260	2.35044e-05	0.000812012	0.000543186	0.000176163	0.000144665
1261	1.88557e-05	0.000807253	0.00054412	0.000163033	0.000150278
1262	1.45035e-05	0.000801333	0.000545903	0.000148192	0.000156006
1263	1.04258e-05	0.000794489	0.0005484	0.00013202	0.000161768
1264	6.59783e-06	0.000786959	0.000551467	0.000114936	0.000167479
1265	2.99527e-06	0.000778977	0.000554946	9.73821e-05	0.000173054
1266	0	0.000770639	0.000558661	7.97823e-05	0.000178291
1267	0	0.000761429	0.000562361	6.24136e-05	0.000182407
1268	0	0.000752375	0.000565998	4.59253e-05	0.000186204
1269	0	0.000743601	0.00056942	3.07276e-05	0.000189619
1270	0	0.000735194	0.000572484	1.71979e-05	0.000192596
1271	0	0.000727216	0.000575065	5.67373e-06	0.000195095
1272	0	0.000719259	0.00057647	0	0.000196926
1273	0	0.000711391	0.000576684	0	0.000198089
1274	0	0.000704348	0.000576616	0	0.000198837
1275	0	0.000698138	0.000576257	0	0.000199179
1276	0	0.000692758	0.000575617	0	0.000199133
1277	0	0.000688193	0.000574723	0	0.000198723
1278	0	0.000684422	0.000573619	0	0.000197979
1279	0	0.000680318	0.000570912	8.79905e-06	0.000196548
1280	0	0.000676464	0.000567483	2.15079e-05	0.000194689
1281	0	0.000673038	0.000563688	3.64714e-05	0.000192522
1282	0	0.000670045	0.000559665	5.33869e-05	0.000190111
1283	0	0.000667495	0.000555558	7.19088e-05	0.000187526
1284	0	0.000665401	0.000551516	9.1658e-05	0.000184836
1285	0	0.000663779	0.000547685	0.000112233	0.000182116
1286	0	0.000662647	0.000544203	0.000133223	0.000179437
1287	0	0.000662022	0.000541195	0.000154219	0.000176869
1288	0	0.000661922	0.000538774	0.00017483	0.000174479
1289	0	0.000662366	0.000537031	0.000194692	0.000172324
1290	0	0.000663375	0.00053604	0.00021348	0.000170456
1291	0	0.000664972	0.000535851	0.00023092	0.000168915
1292	0	0.000667189	0.000536497	0.000246791	0.000167729
1293	0	0.000670068	0.000537985	0.000260932	0.000166911
1294	0	0.000673666	0.000540305	0.000273244	0.000166461
1295	0	0.00067806	0.000543426	0.000283687	0.000166361
1296	0	0.000683343	0.000547298	0.000292274	0.000166578
1297	0	0.000689626	0.000551857	0.000299074	0.000167066
1298	0	0.00069703	0.000557024	0.000304197	0.000167765
1299	0	0.00070567	0.00056271	0.000307796	0.000168609
1300	0	0.000715638	0.000568821	0.000310059	0.000169528
1301	0	0.000726974	0.000575263	0.000311209	0.000170461
1302	0	0.000739638	0.000581948	0.000311496	0.000171354
1303	0	0.000753482	0.000588797	0.000311202	0.000172177
1304	0	0.000768226	0.00059575	0.000310629	0.000172927
1305	0	0.000783445	0.000602768	0.000310099	0.000173628
1306	0	0.000798574	0.000609834	0.000309933	0.000174341
1307	0	0.000812929	0.000616954	0.000310437	0.000175153
1308	0	0.000825749	0.000624153	0.000311875	0.000176172
1309	0	0.000836261	0.000631472	0.00031444	0.000177519
1310	0	0.000843752	0.000638957	0.000318224	0.000179309
1311	0	0.000847642	0.000646654	0.000323187	0.000181643
1312	0	0.000847558	0.000654597	0.000329142	0.000184586
1313	0	0.000843382	0.000662807	0.000335741	0.000188164
1314	0	0.000835281	0.000671283	0.000342483	0.000192351
1315	0	0.000823703	0.000680006	0.00034874	0.000197075
1316	0	0.000809343	0.000688938	0.00035379	0.000202218
1317	0	0.000793082	0.000698027	0.000356871	0.000207627
1318	0	0.000775917	0.000707219	0.000357235	0.000213128
1319	0	0.000758871	0.000716455	0.000354209	0.000218542
1320	0	0.000742916	0.000725687	0.000347244	0.000223697
1321	0	0.000728906	0.000734872	0.000335961	0.000228438
1322	0	0.000717532	0.000743979	0.000320175	0.000232642
1323	0	0.000709294	0.000752986	0.000299911	0.000236216
1324	0	0.000704498	0.000761873	0.000275398	0.0002391
1325	0	0.000703269	0.000770621	0.000247053	0.000241266
1326	0	0.000705582	0.000779204	0.00021545	0.000242709
1327	0	0.000711286	0.000787587	0.000181288	0.000243447
1328	0	0.00072014	0.000795721	0.00014535	0.000243512
1329	0	0.000731844	0.000803544	0.000108456	0.000242947
1330	0	0.000746049	0.000810986	7.14304e-05	0.000241803
1331	0	0.000762382	0.000817972	3.50605e-05	0.000240138
1332	0	0.00078044	0.000824429	6.46586e-08	0.000238019
1333	0	0.000795669	0.000824853	0	0.000234056
1334	0	0.000812048	0.00082505	0	0.000229907
1335	0	0.000829145	0.000825078	0	0.000225688
1336	0	0.000846471	0.000824996	0	0.000221522
1337	0	0.000863495	0.000824872	0	0.000217533
1338	0	0.000879648	0.000824789	0	0.000213854
1339	0	0.00089435	0.00082484	0	0.000210613
1340	0	0.000907023	0.000825123	0	0.000207936
1341	0	0.000917127	0.000825738	0	0.000205939
1342	0	0.000924181	0.000826777	0	0.000204719
1343	0	0.0009278	0.000828318	0	0.000204354
1344	0	0.000927711	0.000830417	0	0.000204892
1345	0	0.000923779	0.000833103	0	0.000206353
1346	0	0.000916013	0.000836374	0	0.000208726
1347	0	0.000904571	0.000840193	0	0.000211967
1348	0	0.000889755	0.00084449	0	0.000216009
1349	0	0.000871997	0.000849167	0	0.00022076
1350	0	0.000851837	0.000854096	0	0.000226113
1351	0	0.000829905	0.00085913	0	0.000231957
1352	0	0.00080689	0.000864108	0	0.000238177
1353	0	0.000783512	0.000868863	0	0.00024467
1354	0	0.000760494	0.000873225	0	0.000251343
1355	0	0.000738529	0.000877036	0	0.000258122
1356	0	0.000718249	0.000880152	0	0.00026495
1357	0	0.000700186	0.000882459	0	0.000271787
1358	0	0.000684742	0.000883874	0	0.000278606
1359	0	0.000672152	0.000884363	0	0.000285385
1360	0	0.000662455	0.000883939	0	0.000292104
1361	0	0.000655487	0.000882672	0	0.000298737
1362	0	0.000650874	0.000880687	0	0.00030525
1363	0	0.000648067	0.000878152	0	0.000311597
1364	0	0.000646386	0.00087527	0	0.000317726
1365	0	0.000645093	0.000872257	0	0.000323582
1366	0	0.000643476	0.000869319	0	0.000329114
1367	0	0.000640931	0.000866628	0	0.000334286
1368	0	0.00063704	0.000864305	0	0.000339085
1369	0	0.000631615	0.000862405	0	0.000343522
1370	0	0.00062472	0.000860911	0	0.000347641
1371	0	0.000616647	0.000859747	0	0.000351511
1372	0	0.000607235	0.000857949	5.04981e-06	0.000354998
1373	0	0.000597516	0.000855966	1.15016e-05	0.000358368
1374	0	0.000588492	0.000854173	1.61239e-05	0.000361868
1375	0	0.000580734	0.000852468	1.86666e-05	0.00036561
1376	0	0.000574685	0.000850772	1.89645e-05	0.000369684
1377	0	0.000570613	0.000849034	1.69529e-05	0.00037416
1378	0	0.000568604	0.000847234	1.26693e-05	0.000379082
1379	0	0.000568569	0.000845382	6.24642e-06	0.000384473
1380	0	0.000570012	0.000843164	0	0.000390244
1381	0	0.00057187	0.00083967	0	0.000396128
1382	0	0.000574567	0.000836039	0	0.000402404
1383	0	0.000577728	0.000832382	0	0.000409071
1384	0	0.00058099	0.000828799	0	0.000416134
1385	0	0.000584026	0.000825381	0	0.000423605
1386	0	0.000586556	0.000822197	0	0.000431504
1387	0	0.000588356	0.000819299	0	0.000439863
1388	0	0.000589261	0.000816721	0	0.000448721
1389	0	0.000589154	0.000814476	0	0.000458127
1390	0	0.000587971	0.000812563	0	0.000468139
1391	0	0.000585688	0.000810965	0	0.000478823
1392	0	0.00058232	0.000809657	0	0.000490248
1393	0	0.000577909	0.000808602	0	0.000502492
1394	0	0.000572525	0.00080776	0	0.000515635
1395	0	0.000566255	0.000807086	0	0.000529762
1396	0	0.000559202	0.000806534	0	0.000544959
1397	0	0.000551479	0.00080606	0	0.000561312
1398	0	0.000543204	0.000805623	0	0.00057891
1399	0	0.000534498	0.000805183	0	0.00059784
1400	0	0.000525482	0.000804709	0	0.00061819
1401	0	0.000516274	0.000804175	0	0.000640047
1402	0	0.000506988	0.000803558	0	0.000663495
1403	0	0.00049773	0.000802846	0	0.000688622
1404	0	0.000488604	0.000802029	0	0.000715514
1405	0	0.000479706	0.000801102	0	0.000744263
1406	0	0.000471126	0.000800063	0	0.000774966
1407	0	0.000462949	0.000798914	0	0.000807727
1408	0	0.000455258	0.000797654	0	0.000842669
1409	0	0.000448132	0.000796283	0	0.000879928
1410	0	0.000441647	0.000794796	0	0.000919667
1411	0	0.000435878	0.000793186	0	0.000962081
1412	0	0.000430902	0.000791436	0	0.0010074
1413	0	0.000426793	0.000789525	0	0.00105589
1414	0	0.000423629	0.00078742	0	0.00110787
1415	0	0.00042149	0.000785081	0	0.00116371
1416	0	0.00042046	0.000782457	0	0.0012238
1417	0	0.000420629	0.000779486	0	0.0012886
1418	0	0.000422092	0.000776096	0	0.00135855
1419	0	0.000424954	0.000772206	0	0.00143411
1420	0	0.000429322	0.00076773	0	0.00151569
1421	0	0.000435308	0.000762575	0	0.00160364
1422	0	0.00044302	0.000756652	0	0.00169816
1423	0	0.000452552	0.000749878	0	0.00179928
1424	0	0.000463969	0.000742184	0	0.00190679
1425	0	0.000477293	0.000733526	0	0.00202018
1426	0	0.00049248	0.00072389	0	0.00213861
1427	0	0.000509408	0.000713301	0	0.00226085
1428	0	0.000527858	0.000701833	0	0.00238531
1429	0	0.00054751	0.000689604	0	0.00251003
1430	0	0.000567945	0.000676785	0	0.00263273
1431	0	0.000588662	0.000663587	0	0.00275091
1432	0	0.000609108	0.000650254	0	0.00286192
1433	0	0.000628714	0.000637047	0	0.00296313
1434	0	0.000646948	0.000624227	0	0.00305206
1435	0	0.000663366	0.000612034	0	0.00312647
1436	0	0.000677656	0.000600669	0	0.00318457
1437	0	0.000689682	0.000590279	0	0.00322507
1438	0	0.000699501	0.000580945	0	0.00324725
1439	0	0.000707374	0.000572674	0	0.00325099
1440	0	0.000713743	0.000565406	0	0.00323678
1441	0	0.000719207	0.000559016	0	0.00320562
1442	0	0.000724471	0.000553329	0	0.00315895
1443	0	0.000730291	0.000548137	0	0.00309856
1444	0	0.00073742	0.00054321	0	0.00302643
1445	0	0.000746552	0.000538324	0	0.00294463
1446	0	0.00075827	0.000533269	0	0.00285523
1447	0	0.00077301	0.000527869	0	0.00276018
1448	0	0.000791025	0.000521991	0	0.00266128
1449	0	0.000812368	0.000515558	0	0.00256012
1450	0	0.000836873	0.000508556	0	0.00245808
1451	0	0.000864159	0.000501034	0	0.00235636
1452	0	0.000893633	0.00049311	0	0.00225595
1453	0	0.000924515	0.000484959	0	0.00215769
1454	0	0.000955871	0.000476814	0	0.00206231
1455	0	0.000981673	0.000462352	3.98601e-05	0.00196864
1456	0	0.00100451	0.000446698	9.03116e-05	0.00187853
1457	0	0.00102489	0.000432161	0.000139098	0.00179299
1458	0	0.00104198	0.000419128	0.000185417	0.00171248
1459	0	0.00105512	0.000407916	0.000228567	0.00163743
1460	0	0.00106389	0.000398744	0.000268006	0.00156824
1461	0	0.00106811	0.000391711	0.000303397	0.00150528
1462	0	0.00106788	0.000386784	0.000334625	0.00144893
1463	0	0.00106354	0.000383808	0.000361803	0.00139956
1464	0	0.00105563	0.000382516	0.000385242	0.00135754
1465	0	0.00104486	0.000382559	0.000405416	0.00132322
1466	0	0.00103203	0.00038354	0.000422908	0.00129685
1467	3.06075e-06	0.00101706	0.000384934	0.000438135	0.00127765
1468	8.81244e-06	0.00100085	0.000386367	0.000451766	0.00126559
1469	1.29841e-05	0.000985356	0.000387664	0.000464717	0.00126145
1470	1.56776e-05	0.000971168	0.000388556	0.000477531	0.00126428
1471	1.70902e-05	0.000958733	0.000388855	0.000490673	0.00127257
1472	1.75167e-05	0.000948366	0.000388452	0.00050453	0.0012843
1473	1.73388e-05	0.000940264	0.000387313	0.000519412	0.00129697
1474	1.70014e-05	0.000934528	0.000385465	0.000535565	0.00130773
1475	1.69766e-05	0.000931185	0.000382983	0.000553172	0.00131367
1476	1.77197e-05	0.000930207	0.00037997	0.00057236	0.00131204
1477	1.96235e-05	0.00093153	0.000376546	0.000593197	0.00130057
1478	2.29776e-05	0.000935065	0.000372831	0.000615691	0.00127772
1479	2.794e-05	0.000940707	0.000368937	0.000639786	0.00124284
1480	3.45248e-05	0.000948344	0.000364963	0.000665364	0.00119627
1481	4.2609e-05	0.000957864	0.000360989	0.000692249	0.00113927
1482	5.19557e-05	0.00096916	0.000357076	0.000720213	0.00107386
1483	6.225e-05	0.000982143	0.000353263	0.000748995	0.00100257
1484	7.31406e-05	0.000996747	0.000349577	0.000778312	0.000928146
1485	8.42804e-05	0.00101293	0.000346023	0.000807879	0.000853263
1486	9.53592e-05	0.00103069	0.000342596	0.000837414	0.000780282
1487	0.000106125	0.00105004	0.000339278	0.000866655	0.000711072
1488	0.000116393	0.00107102	0.000336038	0.000895355	0.000646928
1489	0.000126039	0.00109368	0.000332841	0.000923287	0.000588567
1490	0.000134987	0.00111804	0.000329642	0.00095023	0.000536191
1491	0.000143193	0.00114409	0.000326397	0.000975968	0.000489601
1492	0.000150623	0.00117176	0.000323062	0.00100028	0.000448321
1493	0.00015724	0.00120092	0.000319601	0.00102292	0.000411726
1494	0.000162991	0.0012313	0.000315995	0.00104363	0.000379147
1495	0.000167811	0.00126254	0.000312244	0.00106215	0.000349951
1496	0.000171616	0.00129415	0.000308371	0.00107815	0.00032359
1497	0.000174323	0.00132553	0.000304433	0.00109134	0.000299623
1498	0.00017585	0.001356	0.000300512	0.00110139	0.000277717
1499	0.000176137	0.00138479	0.00029672	0.001108	0.000257641
1500	0.000175147	0.00141112	0.000293184	0.00111089	0.000239238
1501	0.000172879	0.00143425	0.000290043	0.00110982	0.000222419
1502	0.000169368	0.0014535	0.000287424	0.00110464	0.000207132
1503	0.000164682	0.00146836	0.000285436	0.00109528	0.000193362
1504	0.000158918	0.0014785	0.000284144	0.00108182	0.000181116
1505	0.000152189	0.00148378	0.000283559	0.00106449	0.000170427
1506	0.000144621	0.00148435	0.000283625	0.00104372	0.000161355
1507	0.000136336	0.00148056	0.000284212	0.00102013	0.000153992
1508	0.000127446	0.00147296	0.000285116	0.0009946	0.000148467
1509	0.000118049	0.00146227	0.000286067	0.000968213	0.000144946
1510	0.000108224	0.00144931	0.000286752	0.000942234	0.000143622
1511	9.80385e-05	0.00143494	0.000286833	0.00091802	0.000144692
1512	8.75528e-05	0.00141996	0.000285997	0.000896895	0.000148319
1513	7.68339e-05	0.00140509	0.000283988	0.000879965	0.000154578
1514	6.59703e-05	0.00139091	0.000280664	0.000867921	0.000163394
1515	5.50885e-05	0.00137782	0.00027603	0.000860829	0.000174477
1516	4.43672e-05	0.00136604	0.000270272	0.000857977	0.000187277
1517	3.40478e-05	0.00135562	0.000263764	0.000857806	0.000200973
1518	2.44372e-05	0.00134648	0.000257042	0.00085797	0.000214496
1519	1.59023e-05	0.00133844	0.000250756	0.000855555	0.000226617
1520	8.85365e-06	0.00133127	0.000245586	0.000847419	0.000236071
1521	3.7186e-06	0.00132471	0.000242154	0.000830634	0.000241712
1522	9.03443e-07	0.00131857	0.000240925	0.000802931	0.000242672
1523	7.4586e-07	0.00131268	0.000242135	0.000763084	0.000238484
1524	3.46006e-06	0.00130692	0.000245742	0.000711152	0.000229156
1525	9.07962e-06	0.0013012	0.000251431	0.00064853	0.000215172
1526	1.74065e-05	0.00129541	0.000258646	0.000577807	0.000197425
1527	2.7978e-05	0.00128939	0.000266667	0.000502465	0.000177089
1528	4.00655e-05	0.00128289	0.000274695	0.000426486	0.000155475
1529	5.27149e-05	0.00127557	0.000281941	0.000353935	0.000133882
1530	6.4834e-05	0.00126705	0.000287697	0.000288589	0.000113486
1531	7.53184e-05	0.0012569	0.000291384	0.000233662	9.52651e-05
1532	8.31964e-05	0.0012448	0.000292576	0.000191643	7.99783e-05
1533	8.77646e-05	0.00123056	0.000290999	0.000164234	6.81793e-05
1534	8.86843e-05	0.00121419	0.000286515	0.000152366	6.02438e-05
1535	8.60162e-05	0.00119593	0.000279117	0.000156231	5.63924e-05
1536	8.01869e-05	0.0011762	0.000268919	0.00017532	5.66915e-05
1537	7.18982e-05	0.00115556	0.000256169	0.000208408	6.10245e-05
1538	6.20019e-05	0.00113459	0.000241264	0.000253517	6.90408e-05
1539	5.1372e-05	0.00111384	0.000224771	0.000307867	8.01024e-05
1540	4.07973e-05	0.00109372	0.000207434	0.000367887	9.32551e-05
1541	3.09125e-05	0.00107447	0.000190146	0.000429329	0.00010725
1542	2.21674e-05	0.00105618	0.000173898	0.00048755	0.000120633
1543	1.48278e-05	0.00103879	0.000159684	0.000537945	0.000131902
1544	8.99556e-06	0.00102215	0.000148385	0.000576477	0.000139701
1545	4.63595e-06	0.00100604	0.00014066	0.000600228	0.000143029
1546	1.60639e-06	0.000990278	0.000136852	0.000607814	0.000141397
1547	0	0.000974585	0.000136938	0.00059956	0.000134812
1548	0	0.00095871	0.000140542	0.000577429	0.000123808
1549	0	0.000942966	0.000147087	0.000544793	0.000109878
1550	0	0.000927247	0.000155767	0.000505652	9.42953e-05
1551	0	0.000911496	0.000165736	0.000464128	7.83787e-05
1552	0	0.000895693	0.000176219	0.00042391	6.33014e-05
1553	0	0.000879856	0.000186591	0.000387864	4.99572e-05
1554	0	0.000864026	0.000196416	0.000357843	3.88968e-05
1555	0	0.000848262	0.000205446	0.000334705	3.03334e-05
1556	0	0.000832636	0.000213594	0.000318478	2.41992e-05
1557	0	0.000817221	0.000220882	0.000308607	2.02308e-05
1558	0	0.000802092	0.000227394	0.000304217	1.80585e-05
1559	0	0.000787316	0.000233236	0.000304332	1.72831e-05
1560	0	0.000772957	0.000238501	0.000308031	1.75307e-05
1561	0	0.000759068	0.000243258	0.000314534	1.84841e-05
1562	0	0.000745695	0.000247547	0.000323233	1.98941e-05
1563	0	0.000732879	0.000251378	0.000333677	2.15777e-05
1564	0	0.000720653	0.000254744	0.000345541	2.34079e-05
1565	0	0.000709049	0.000257627	0.000358588	2.53018e-05
1566	0	0.000698097	0.000260005	0.000372632	2.72081e-05
1567	0	0.00068783	0.000261861	0.000387513	2.90976e-05
1568	0	0.000678282	0.000263184	0.000403073	3.09557e-05
1569	0	0.000669489	0.000263977	0.000419155	3.2777e-05
1570	0	0.000661494	0.000264256	0.000435591	3.45617e-05
1571	0	0.00065434	0.000264047	0.000452208	3.63133e-05
1572	0	0.000648077	0.000263392	0.000468831	3.80368e-05
1573	0	0.000642753	0.000262345	0.000485287	3.97373e-05
1574	0	0.000638418	0.000260968	0.000501418	4.14193e-05
1575	0	0.00063512	0.000259334	0.000517078	4.30854e-05
1576	0	0.000632902	0.000257519	0.000532147	4.47362e-05
1577	0	0.000631803	0.000255604	0.000546534	4.63689e-05
1578	0	0.000631855	0.000253669	0.000560178	4.79779e-05
1579	0	0.000633082	0.000251791	0.000573055	4.95534e-05
1580	0	0.000635497	0.000250041	0.000585175	5.10821e-05
1581	0	0.000639109	0.00024848	0.000596582	5.25468e-05
1582	0	0.000643913	0.000247158	0.000607353	5.39268e-05
1583	0	0.0006499	0.00024611	0.000617592	5.51979e-05
1584	0	0.000657056	0.000245355	0.000627428	5.63334e-05
1585	0	0.000665361	0.000244895	0.000637005	5.73043e-05
1586	0	0.000674793	0.000244715	0.000646482	5.80808e-05
1587	0	0.000685331	0.000244782	0.000656017	5.86325e-05
1588	0	0.000696958	0.000245048	0.000665768	5.89302e-05
1589	0	0.000709661	0.000245453	0.000675885	5.89465e-05
1590	0	0.000723432	0.000245927	0.000686501	5.86577e-05
1591	0	0.000738274	0.000246394	0.000697728	5.80446e-05
1592	0	0.000754199	0.000246778	0.000709653	5.70941e-05
1593	0	0.000771229	0.000247008	0.000722337	5.58002e-05
1594	0	0.000789396	0.00024702	0.000735808	5.41656e-05
1595	0	0.000808743	0.000246766	0.000750065	5.22023e-05
1596	0	0.000829322	0.000246218	0.000765076	4.99324e-05
1597	0	0.000851194	0.000245369	0.000780781	4.73889e-05
1598	0	0.000874427	0.000244237	0.000797097	4.46154e-05
1599	0	0.000899094	0.000242865	0.00081392	4.16664e-05
1600	0	0.00092527	0.000241325	0.000831134	3.86057e-05
1601	0	0.000953035	0.000239706	0.000848618	3.55061e-05
1602	0	0.000982465	0.000238123	0.000866254	3.24464e-05
1603	0	0.00101364	0.000236698	0.000883937	2.95099e-05
1604	0	0.00104663	0.000235566	0.000901589	2.67807e-05
1605	0	0.0010815	0.000234859	0.000919161	2.43401e-05
1606	0	0.00111833	0.000234701	0.000936653	2.22623e-05
1607	0	0.00115718	0.000235204	0.000954121	2.06104e-05
1608	0	0.00119811	0.000236459	0.000971684	1.94308e-05
1609	0	0.0012412	0.000238532	0.000989534	1.87498e-05
1610	0	0.00128649	0.000241462	0.00100794	1.8569e-05
1611	0	0.00133407	0.000245256	0.00102723	1.88631e-05
1612	0	0.00138399	0.000249886	0.0010478	1.95803e-05
1613	0	0.00143635	0.000255283	0.00107007	2.06441e-05
1614	0	0.00149119	0.000261329	0.00109448	2.19602e-05
1615	0	0.0015486	0.000267844	0.0011214	2.34271e-05
1616	0	0.00160864	0.000274572	0.00115112	2.49505e-05
1617	4.76629e-06	0.00166995	0.000280986	0.00118347	2.50644e-05
1618	1.29058e-05	0.00173298	0.000286687	0.00121854	2.41555e-05
1619	2.17067e-05	0.00179859	0.000291223	0.00125637	2.30641e-05
1620	3.0193e-05	0.00186712	0.000293982	0.00129675	2.22034e-05
1621	3.71687e-05	0.00193901	0.000294301	0.00133939	2.21408e-05
1622	4.13477e-05	0.00201477	0.000291508	0.00138402	2.35533e-05
1623	4.15213e-05	0.00209491	0.000284986	0.0014304	2.71527e-05
1624	3.67383e-05	0.00217989	0.000274245	0.00147839	3.3586e-05
1625	2.64632e-05	0.00226998	0.000259004	0.00152785	4.332e-05
1626	1.06836e-05	0.00236517	0.000239258	0.00157862	5.65244e-05
1627	0	0.00246211	0.000214963	0.00162956	7.00214e-05
1628	0	0.00255867	0.000186629	0.00167953	8.17879e-05
1629	0	0.00265721	0.000155721	0.00172802	9.4209e-05
1630	0	0.00275686	0.000123558	0.00177304	0.000106172
1631	0	0.00285675	9.15849e-05	0.00181193	0.000116267
1632	0	0.00295638	6.12036e-05	0.00184152	0.000122923
1633	0	0.00305569	3.36133e-05	0.00185844	0.000124615
1634	0	0.00315506	9.68572e-06	0.0018597	0.000120115
1635	0	0.00325177	0	0.0018356	0.000108634
1636	0	0.00334723	0	0.00178928	9.03708e-05
1637	0	0.00344319	0	0.00172967	6.65158e-05
1638	0	0.00353664	0	0.00166032	3.90272e-05
1639	0	0.00362307	0	0.00158646	1.05225e-05
1640	0	0.00369527	0	0.00151275	0
1641	0	0.00375017	0	0.00144551	0
1642	0	0.00378717	0	0.00138963	0
1643	0	0.0038072	0	0.00134654	0
1644	0	0.003814	0	0.00131509	0
1645	0	0.00381314	0	0.00129219	0
1646	0	0.00381053	0	0.00127395	0
1647	0	0.0038102	2.24602e-06	0.00125509	0
1648	0	0.00381518	5.64406e-06	0.001234	0
1649	0	0.003827	6.73029e-06	0.00121224	0
1650	0	0.00384433	5.74776e-06	0.00118974	0
1651	0	0.00386495	3.03073e-06	0.00116707	0
1652	0	0.00388634	0	0.00114411	0
1653	0	0.00390555	0	0.0011187	3.40317e-06
1654	0	0.00392289	0	0.00109343	1.01315e-05
1655	0	0.00393855	0	0.00106843	1.78048e-05
1656	0	0.0039523	0	0.00104351	2.69233e-05
1657	0	0.00396325	0	0.00101877	3.7746e-05
1658	0	0.00396933	0	0.000994912	5.02114e-05
1659	0	0.00396722	0	0.000973323	6.39287e-05
1660	0	0.00395268	0	0.000955856	7.82548e-05
1661	0	0.00392153	0	0.00094438	9.24493e-05
1662	0	0.00387065	0	0.000940191	0.000105865
1663	0	0.003799	0	0.000943524	0.000118118
1664	0	0.00370803	0	0.000953352	0.000129172
1665	0	0.00360146	0	0.000967552	0.000139325
1666	0	0.00348452	0	0.000983388	0.000149104
1667	0	0.00336284	0	0.000998123	0.000159099
1668	0	0.00323802	1.11343e-05	0.00100111	0.000169679
1669	0	0.00311486	3.05911e-05	0.000993141	0.000181208
1670	0	0.00299878	4.91981e-05	0.000980793	0.000193908
1671	0	0.00289118	6.65055e-05	0.000964758	0.000207684
1672	1.9445e-06	0.00279191	8.21941e-05	0.000945941	0.000221706
1673	1.75513e-05	0.00269736	9.57208e-05	0.000924662	0.000232174
1674	3.20886e-05	0.00261137	0.000107621	0.000903071	0.000242993
1675	4.57301e-05	0.00253333	0.000117926	0.000882067	0.000253686
1676	5.86456e-05	0.0024627	0.000126699	0.000862295	0.000263791
1677	7.0986e-05	0.00239897	0.000134028	0.000844129	0.000272891
1678	8.28749e-05	0.00234172	0.000140028	0.000827662	0.000280632
1679	9.44039e-05	0.00229058	0.00014485	0.000812715	0.00028675
1680	0.000105632	0.00224511	0.000148695	0.000798847	0.000291083
1681	0.000116584	0.00220485	0.000151825	0.00078537	0.000293604
1682	0.000127256	0.00216917	0.000154577	0.000771373	0.000294449
1683	0.000137607	0.00213729	0.000157361	0.000755767	0.000293978
1684	0.000147555	0.00210827	0.000160656	0.000737338	0.000292882
1685	0.000156944	0.00208102	0.000164974	0.000714827	0.000292365
1686	0.000165511	0.00205433	0.000170825	0.000687018	0.000294432
1687	0.000172825	0.00202698	0.000178664	0.000652826	0.000302229
1688	0.000178247	0.00199783	0.000188831	0.000611393	0.000320288
1689	0.00018095	0.0019659	0.000201507	0.000562181	0.000354387
1690	0.000180053	0.00193053	0.000216682	0.000505088	0.000410656
1691	0.000174908	0.00189147	0.000234152	0.000440582	0.000493701
1692	0.000165514	0.00184907	0.000253541	0.000369849	0.000603962
1693	0.000152913	0.00180433	0.000274342	0.000294876	0.000735159
1694	0.000139361	0.00175885	0.000295983	0.000218403	0.000873198
1695	0.00012809	0.00171466	0.000317876	0.000143662	0.000997768
1696	0.000122599	0.00167386	0.00033947	7.38905e-05	0.00108689
1697	0.000125681	0.00163812	0.000360279	1.17573e-05	0.00112319
1698	0.000137691	0.00160348	0.000373147	0	0.0010979
1699	0.000158732	0.00157456	0.000384163	0	0.00101785
1700	0.000186661	0.00155182	0.000394918	0	0.000899485
1701	0.000218231	0.00153375	0.00040506	0	0.000764194
1702	0.000250322	0.00151873	0.000414307	0	0.000632455
1703	0.000280691	0.00150539	0.000422499	0	0.000519027
1704	0.000308267	0.00149285	0.000429616	0	0.000431006
1705	0.000332999	0.00148074	0.000435734	0	0.000368674
1706	0.000355459	0.00146905	0.00044098	0	0.00032796
1707	0.000376409	0.00145808	0.000445467	0	0.000303127
1708	0.000396482	0.00144827	0.000449262	0	0.000288745
1709	0.000416035	0.00144017	0.000452371	0	0.000280663
1710	0.000435135	0.00143434	0.000454741	0	0.000276179
1711	0.000453635	0.00143133	0.000456289	0	0.000273759
1712	0.000471267	0.00143151	0.00045694	0	0.000272636
1713	0.000487747	0.00143499	0.000456663	0	0.000272455
1714	0.000502854	0.00144148	0.000455515	0	0.000273023
1715	0.000516492	0.00145019	0.000453667	0	0.000274169
1716	0.000528721	0.00145986	0.00045141	0	0.000275676
1717	0.000539754	0.00146877	0.000449138	0	0.000277266
1718	0.000549936	0.00147503	0.000447299	0	0.000278626
1719	0.00055969	0.00147675	0.000446342	0	0.000279449
1720	0.000569456	0.00147242	0.00044664	0	0.000279487
1721	0.00057963	0.00146107	0.000448438	0	0.000278594
1722	0.000590516	0.00144248	0.000451816	0	0.000276772
1723	0.00060229	0.00141718	0.000456683	0	0.000274204
1724	0.000614992	0.00138636	0.000462801	0	0.000271304
1725	0.000628513	0.00135169	0.000469719	6.257e-07	0.000268779
1726	0.000641721	0.0013101	0.000469923	4.51139e-05	0.000266184
1727	0.000655048	0.0012682	0.000468958	9.70083e-05	0.000266754
1728	0.000667964	0.00122779	0.000465633	0.0001609	0.000272883
1729	0.000679852	0.00119038	0.000458568	0.00024276	0.000287381
1730	0.000690149	0.00115715	0.000446603	0.000347907	0.00031275
1731	0.000698544	0.00112894	0.00042945	0.000477517	0.000349963
1732	0.000705198	0.00110625	0.000408412	0.000624887	0.000397163
1733	0.000710846	0.0010893	0.000386684	0.000773731	0.000449084
1734	0.000716638	0.00107818	0.000368857	0.000900696	0.000497947
1735	0.000723746	0.00107292	0.000359556	0.000982356	0.000535924
1736	0.000732852	0.00107368	0.000361735	0.00100399	0.000558224
1737	0.000743805	0.00108079	0.000375499	0.000965697	0.000565218
1738	0.000755642	0.00109471	0.000398102	0.000882388	0.000562407
1739	0.000766966	0.00111584	0.000425136	0.000777649	0.000558215
1740	0.000776495	0.00114429	0.000452227	0.000674961	0.000560839
1741	0.000783505	0.00117958	0.000476385	0.000590723	0.000575728
1742	0.000788022	0.00122049	0.000496474	0.000531755	0.000604641
1743	0.000790743	0.00126493	0.000512862	0.000497021	0.000646212
1744	0.000792834	0.00130999	0.00052667	0.000481359	0.000697261
1745	0.000795691	0.00135213	0.000539057	0.000478936	0.000754057
1746	0.000800756	0.00138753	0.0005508	0.0004852	0.000813115
1747	0.00080938	0.00141253	0.000562161	0.000497333	0.00087151
1748	0.000822716	0.00142412	0.000572955	0.000513806	0.000926903
1749	0.000841621	0.00142051	0.000582694	0.000533652	0.00097748
1750	0.000866568	0.00140146	0.000590739	0.000555854	0.00102189
1751	0.000897591	0.00136857	0.000596428	0.00057897	0.00105926
1752	0.000934264	0.00132526	0.000599166	0.000601016	0.00108915
1753	0.000975755	0.00127648	0.000598491	0.000619559	0.00111158
1754	0.00102093	0.00122808	0.000594124	0.000631999	0.00112699
1755	0.00106855	0.00118586	0.000586009	0.00063598	0.0011361
1756	0.00111746	0.00115447	0.000574377	0.000629888	0.00113976
1757	0.00116685	0.00113621	0.000559792	0.000613306	0.00113883
1758	0.00121639	0.00113033	0.000543169	0.000587295	0.00113397
1759	0.00126623	0.00113292	0.000525717	0.000554361	0.00112572
1760	0.00131691	0.0011378	0.000508773	0.000518043	0.00111465
1761	0.00136899	0.00113804	0.000493559	0.00048219	0.00110183
1762	0.00142275	0.00112781	0.000480932	0.000450124	0.00108942
1763	0.00147784	0.00110376	0.000471222	0.000423963	0.00108134
1764	0.00153315	0.00106548	0.000464224	0.000404325	0.00108366
1765	0.00158684	0.00101502	0.000459351	0.000390475	0.00110431
1766	0.00163679	0.000955818	0.000455873	0.000380835	0.00115175
1767	0.00168109	0.000891662	0.000453126	0.000373642	0.00123217
1768	0.00171882	0.000826145	0.000450622	0.000367536	0.00134593
1769	0.00175049	0.000762684	0.000448042	0.00036192	0.00148446
1770	0.00177824	0.00070477	0.000445153	0.000356993	0.00162955
1771	0.0018053	0.000656009	0.000441727	0.000353483	0.0017565
1772	0.00183493	0.000619729	0.000437506	0.000352159	0.00184102
1773	0.00186928	0.000598267	0.000432232	0.00035332	0.00186729
1774	0.00190844	0.000592315	0.000425707	0.000356461	0.00183377
1775	0.00195045	0.000600687	0.000417854	0.000360281	0.00175378
1776	0.001992	0.000620645	0.000408756	0.00036301	0.00165063
1777	0.00202962	0.0006486	0.000398655	0.000362903	0.00154964
1778	0.00206079	0.000680888	0.000387925	0.000358666	0.00147076
1779	0.00208446	0.000714331	0.000377023	0.000349667	0.00142466
1780	0.00210106	0.000746473	0.000366439	0.000335887	0.00141266
1781	0.00211196	0.000775555	0.000356642	0.000317727	0.00142957
1782	0.00211896	0.00080036	0.000348042	0.00029579	0.00146719
1783	0.00212383	0.000820058	0.000340954	0.000270739	0.00151716
1784	0.00212808	0.000834112	0.000335571	0.000243238	0.00157239
1785	0.0021329	0.000842249	0.000331952	0.000213972	0.00162747
1786	0.00213921	0.000844474	0.000330009	0.000183681	0.00167846
1787	0.00214769	0.000841092	0.000329505	0.000153192	0.00172246
1788	0.00215889	0.000832725	0.000330061	0.000123418	0.00175735
1789	0.00217318	0.000820311	0.000331164	9.53434e-05	0.00178159
1790	0.00219082	0.000805089	0.00033219	6.99931e-05	0.00179426
1791	0.00221192	0.000788554	0.000332423	4.8397e-05	0.00179501
1792	0.00223644	0.000772406	0.000331084	3.1563e-05	0.00178407
1793	0.00226422	0.000758464	0.000327371	2.04521e-05	0.00176228
1794	0.00229494	0.000748559	0.0003205	1.59539e-05	0.00173102
1795	0.0023282	0.000744384	0.000309766	1.88506e-05	0.00169208
1796	0.00236352	0.000747312	0.000294615	2.97603e-05	0.00164762
1797	0.00240035	0.000758193	0.000274728	4.90534e-05	0.00160001
1798	0.00243816	0.00077714	0.000250113	7.67475e-05	0.00155173
1799	0.0024764	0.000803349	0.000221181	0.0001124	0.00150531
1800	0.00251458	0.000835008	0.000188783	0.00015503	0.00146321
1801	0.00255226	0.000869329	0.000154205	0.000203103	0.00142777
1802	0.00258903	0.000902744	0.000119079	0.000254618	0.00140116
1803	0.00262456	0.00093127	8.52259e-05	0.000307281	0.00138525
1804	0.00265854	0.000950997	5.44453e-05	0.000358772	0.00138152
1805	0.00269071	0.000958615	2.82796e-05	0.000407033	0.00139097
1806	0.00272085	0.000951893	7.81014e-06	0.000450508	0.00141405
1807	0.00274846	0.000928057	0	0.000483398	0.00145058
1808	0.00277363	0.000889158	0	0.000508987	0.0014998
1809	0.00279663	0.000839293	0	0.000532881	0.00156049
1810	0.0028174	0.000781071	0	0.000554764	0.00163111
1811	0.0028359	0.000717525	0	0.000574207	0.00171004
1812	0.00285218	0.000651683	0	0.000590628	0.00179578
1813	0.00286632	0.000586001	6.66359e-07	0.000602835	0.00188712
1814	0.00287823	0.000521008	7.05639e-06	0.000606325	0.00198331
1815	0.00288843	0.000459988	1.26505e-05	0.000605492	0.00208412
1816	0.00289716	0.00040369	1.71243e-05	0.000600355	0.00218984
1817	0.00290462	0.000352251	2.03224e-05	0.000591216	0.00230135
1818	0.00291094	0.00030537	2.21844e-05	0.00057874	0.00242006
1819	0.00291616	0.000262476	2.26832e-05	0.000563936	0.00254815
1820	0.00292013	0.000222856	2.17859e-05	0.000548071	0.00268868
1821	0.0029225	0.000185734	1.94367e-05	0.000532524	0.00284584
1822	0.00292271	0.000150315	1.55548e-05	0.000518662	0.00302502
1823	0.00292001	0.000115838	1.00413e-05	0.000507792	0.00323211
1824	0.00291379	8.16501e-05	2.78862e-06	0.000501219	0.00347214
1825	0.00290356	4.54423e-05	0	0.000495658	0.00374679
1826	0.0028901	7.64306e-06	0	0.000494169	0.00405163
1827	0.00286684	0	0	0.000485051	0.00437002
1828	0.00284334	0	0	0.000483486	0.00468562
1829	0.00282553	0	0	0.00049707	0.00497627
1830	0.00281676	0	0	0.000528911	0.00522097
1831	0.00281887	0	0	0.000580875	0.00540724
1832	0.00283146	0	0	0.000653003	0.00553494
1833	0.00285206	0	0	0.00074329	0.00561591
1834	0.00287685	0	0	0.000847786	0.00566942
1835	0.00290183	0	0	0.000960819	0.00571567
1836	0.0029239	0	0	0.00107519	0.00576977
1837	0.00294138	0	0	0.00118231	0.00583847
1838	0.00295407	0	0	0.00127261	0.00592019
1839	0.00296283	0	0	0.00133637	0.00600735
1840	0.00296896	0	0	0.00136517	0.00608976
1841	0.00297368	0	0	0.00135361	0.00615764
1842	0.0029778	0	0	0.00130077	0.00620357
1843	0.00298163	0	0	0.00121076	0.0062232
1844	0.00298506	0	0	0.00109212	0.0062151
1845	0.00298778	0	0	0.000956016	0.00617995
1846	0.00298951	0	0	0.000814062	0.00611986
1847	0.00299008	0	0	0.000676196	0.00603779
1848	0.00298847	3.70247e-06	0	0.000547425	0.0059369
1849	0.0029789	3.18531e-05	0	0.000420396	0.00581865
1850	0.0029702	5.33174e-05	0	0.000312329	0.00569266
1851	0.0029625	6.73626e-05	0	0.000222415	0.0055644
1852	0.00295569	7.37993e-05	0	0.000148633	0.00543839
1853	0.00294951	7.30239e-05	0	8.85798e-05	0.00531678
1854	0.00294373	6.6029e-05	0	3.99928e-05	0.00519807
1855	0.00293824	5.43466e-05	0	9.93631e-07	0.00507667
1856	0.00293206	3.41631e-05	0	0	0.00494255
1857	0.00292638	1.44179e-05	0	0	0.00478783
1858	0.00291993	0	0	0	0.00460504
1859	0.0029093	0	0	0	0.00439133
1860	0.00289813	0	0	0	0.00415539
1861	0.00288457	0	0	0	0.00391014
1862	0.00286644	0	0	0	0.00367307
1863	0.0028418	0	0	0	0.00346256
1864	0.00280943	0	0	0	0.00329364
1865	0.00276935	0	0	0	0.00317435
1866	0.00272298	0	0	0	0.00310356
1867	0.0026726	0	1.88852e-06	0	0.00307067
1868	0.00261927	6.59858e-06	7.12768e-06	0	0.00305688
1869	0.00256696	2.1291e-05	1.22646e-05	0	0.0030422
1870	0.00251956	4.01224e-05	1.87151e-05	0	0.0030097
1871	0.00247845	6.31899e-05	2.65377e-05	0	0.00294903
1872	0.00244342	8.9925e-05	3.56202e-05	0	0.00285958
1873	0.00241295	0.000119122	4.57142e-05	0	0.00274966
1874	0.00238482	0.000149149	5.65019e-05	0	0.0026329
1875	0.00235677	0.000177346	6.64223e-05	7.62482e-06	0.00252301
1876	0.00232717	0.000200093	7.2432e-05	3.9974e-05	0.00242922
1877	0.00229644	0.000219328	7.87834e-05	7.03716e-05	0.00235582
1878	0.00226556	0.0002343	8.55518e-05	9.81906e-05	0.00229944
1879	0.00223612	0.000244564	9.28156e-05	0.000123211	0.00225201
1880	0.00220984	0.00024992	0.000100645	0.000145434	0.00220361
1881	0.00218805	0.000250341	0.000109091	0.000164909	0.00214521
1882	0.00217132	0.000245944	0.000118172	0.000181624	0.00207065
1883	0.00215944	0.000236981	0.000127863	0.000195479	0.00197743
1884	0.0021515	0.000223841	0.000138077	0.000206324	0.00186659
1885	0.00214616	0.000207046	0.000148648	0.000214048	0.00174188
1886	0.002142	0.000187233	0.00015931	0.000218675	0.00160866
1887	0.00213779	0.000165121	0.000169692	0.000220443	0.0014727
1888	0.00213271	0.00014147	0.000179322	0.000219859	0.00133931
1889	0.00212642	0.000117043	0.000187647	0.000217693	0.00121269
1890	0.00211903	9.25784e-05	0.000194075	0.000214947	0.00109566
1891	0.002111	6.87669e-05	0.000198025	0.000212767	0.000989738
1892	0.00210291	4.62437e-05	0.000198989	0.000212348	0.000895358
1893	0.00209536	2.55766e-05	0.00019658	0.000214824	0.000812198
1894	0.00208886	7.25476e-06	0.000190586	0.000221172	0.00073952
1895	0.00208161	0	0.00017938	0.000229194	0.000675307
1896	0.00207481	0	0.000163932	0.000240781	0.000619252
1897	0.00207038	0	0.000146044	0.000258672	0.000571616
1898	0.00206826	0	0.000126256	0.000282654	0.0005318
1899	0.00206827	0	0.000105214	0.000312129	0.000499306
1900	0.00207019	0	8.36389e-05	0.000346126	0.000473696
1901	0.00207374	0	6.22914e-05	0.000383337	0.000454551
1902	0.00207862	0	4.19447e-05	0.00042217	0.000441437
1903	0.00208448	0	2.33489e-05	0.000460843	0.000433889
1904	0.00209095	0	7.1897e-06	0.000497514	0.00043141
1905	0.00209682	0	0	0.000525025	0.000433251
1906	0.00210197	0	0	0.000544046	0.000439044
1907	0.00210695	0	0	0.000560722	0.000448774
1908	0.00211124	0	0	0.000575586	0.000462413
1909	0.00211423	0	0	0.000590599	0.000480398
1910	0.00211519	0	0	0.00060953	0.000503787
1911	0.0021133	0	0	0.000637896	0.000534252
1912	0.00210773	0	0	0.000682025	0.000573712
1913	0.0020979	0	0	0.000746962	0.000623511
1914	0.00208371	0	0	0.000833549	0.000683242
1915	0.00206582	0	0	0.000935822	0.000749703
1916	0.00204567	0	0	0.00104038	0.000816669
1917	0.00202524	0	0	0.00112897	0.000875963
1918	0.00200646	0	0	0.00118389	0.000919701
1919	0.00199061	0	0	0.00119411	0.000942796
1920	0.00197798	0	0	0.00115906	0.000944506
1921	0.00196791	0	0	0.00108829	0.000928227
1922	0.00195415	1.82558e-05	0	0.000987624	0.000897115
1923	0.00194303	2.8716e-05	0	0.000886747	0.00086071
1924	0.00193437	3.05302e-05	0	0.000798254	0.000823224
1925	0.00192786	2.5711e-05	0	0.000728016	0.000786182
1926	0.00192305	1.85003e-05	0	0.000676402	0.000749012
1927	0.00191928	1.41057e-05	0	0.000640704	0.000710213
1928	0.00191572	1.70823e-05	0	0.000617266	0.000668487
1929	0.00191148	2.9877e-05	0	0.000602578	0.000623452
1930	0.00190571	5.20002e-05	0	0.000593409	0.000575867
1931	0.00189765	8.00962e-05	0	0.000586578	0.00052745
1932	0.00188667	0.0001089	0	0.000578869	0.000480425
1933	0.0018723	0.000132775	0	0.000567343	0.000436945
1934	0.00185421	0.000147331	0	0.000549921	0.000398552
1935	0.00183231	0.000150579	0	0.000525909	0.000365823
1936	0.00180678	0.000143282	0	0.000496185	0.00033831
1937	0.00177811	0.00012844	0	0.000462895	0.000314775
1938	0.0017471	0.000110215	0	0.000428774	0.000293623
1939	0.00171479	9.27211e-05	0	0.000396351	0.000273365
1940	0.00168232	7.91445e-05	0	0.000367319	0.000252956
1941	0.00165084	7.13928e-05	0	0.000342239	0.00023192
1942	0.00162133	7.02589e-05	0	0.000320609	0.000210276
1943	0.00159456	7.58653e-05	0	0.000301188	0.00018834
1944	0.00157103	8.81033e-05	0	0.000282442	0.000166516
1945	0.00155098	0.000106844	0	0.000262991	0.000145155
1946	0.00153447	0.000131839	0	0.000241997	0.000124514
1947	0.00152142	0.000162381	0	0.000219443	0.000104808
1948	0.00151167	0.000196909	0	0.000196289	8.63003e-05
1949	0.00150501	0.000232768	0	0.000174435	6.93871e-05
1950	0.00150119	0.00026632	0	0.000156484	5.46155e-05
1951	0.00149992	0.000293445	0	0.000145284	4.26252e-05
1952	0.00150081	0.000310351	0	0.000143338	3.40233e-05
1953	0.00150338	0.000314452	0	0.000152221	2.92331e-05
1954	0.00150705	0.000305031	0	0.000172171	2.83723e-05
1955	0.00151117	0.000283455	0	0.00020198	3.1205e-05
1956	0.0015148	0.000251224	5.48686e-06	0.00023509	3.71953e-05
1957	0.00151702	0.000210577	2.29565e-05	0.000263476	4.56186e-05
1958	0.00151804	0.000169896	3.87899e-05	0.000294204	5.56751e-05
1959	0.00151763	0.000132972	5.24351e-05	0.000324932	6.66956e-05
1960	0.00151573	0.000102327	6.35791e-05	0.000353938	7.82092e-05
1961	0.00151245	7.90785e-05	7.21594e-05	0.000380212	8.99744e-05
1962	0.00150803	6.31378e-05	7.83227e-05	0.000403373	0.000101956
1963	0.00150276	5.36082e-05	8.23542e-05	0.000423477	0.000114274
1964	0.00149693	4.92126e-05	8.46007e-05	0.000440799	0.000127142
1965	0.00149075	4.86446e-05	8.54047e-05	0.00045566	0.000140821
1966	0.00148435	5.07833e-05	8.50614e-05	0.000468304	0.000155586
1967	0.00147771	5.47774e-05	8.37983e-05	0.000478858	0.000171707
1968	0.00147076	6.00334e-05	8.17735e-05	0.000487332	0.000189438
1969	0.00146335	6.61522e-05	7.90868e-05	0.000493658	0.000208998
1970	0.00145533	7.28523e-05	7.57983e-05	0.000497739	0.000230566
1971	0.0014466	7.9903e-05	7.19466e-05	0.00049949	0.000254252
1972	0.00143716	8.70779e-05	6.75672e-05	0.000498874	0.000280083
1973	0.0014271	9.41315e-05	6.27048e-05	0.000495921	0.000307986
1974	0.00141667	0.000100795	5.74225e-05	0.000490733	0.000337772
1975	0.0014062	0.000106785	5.18042e-05	0.000483478	0.000369132
1976	0.0013961	0.000111824	4.59541e-05	0.000474374	0.000401645
1977	0.00138681	0.000115657	3.99917e-05	0.000463669	0.000434782
1978	0.00137875	0.000118078	3.40453e-05	0.000451622	0.000467933
1979	0.00137229	0.000118943	2.82448e-05	0.000438483	0.000500422
1980	0.00136766	0.000118178	2.2715e-05	0.000424479	0.00053154
1981	0.00136499	0.000115788	1.75695e-05	0.000409804	0.000560574
1982	0.00136427	0.000111845	1.29074e-05	0.000394617	0.000586834
1983	0.00136534	0.000106484	8.81046e-06	0.000379042	0.00060969
1984	0.00136795	9.98839e-05	5.34225e-06	0.00036317	0.00062859
1985	0.00137176	9.22499e-05	2.54839e-06	0.000347069	0.000643093
1986	0.00137637	8.37969e-05	4.57274e-07	0.000330783	0.000652886
1987	0.00138134	7.4457e-05	0	0.000313651	0.000657798
1988	0.00138636	6.47674e-05	0	0.000296581	0.000657805
1989	0.0013911	5.50166e-05	0	0.000279924	0.00065303
1990	0.0013953	4.53198e-05	0	0.00026367	0.00064374
1991	0.00139872	3.56136e-05	4.80565e-07	0.000247439	0.000630325
1992	0.00140116	2.56651e-05	2.3903e-06	0.000230493	0.000613281
1993	0.0014026	1.57747e-05	4.82398e-06	0.000213489	0.000593178
1994	0.00140297	5.97951e-06	7.71932e-06	0.000196451	0.000570633
1995	0.00140132	0	1.02985e-05	0.000178113	0.000545787
[truncated: 2,005 more rows]

## Sheet: Jurassic–Cretaceous
Mesoproterozoic–Cretaceous provenance and paleogeographic evolution of the Northern Rockies: Insights from the detrital zircon record of the Bridger Range, MT, USA
GSA Data Reposity Item 20XXxxx. Table DR3. NMF sources, source weights, and goodness of fit metrics.
Reconstructed Source Distributions								Compare Input & Reconstructed Sink Samples					Sink Sample Weights
Age (Ma)	Source 1	Source 2	Source 3	Source 4	Source 5				Mean		St. Dev.			K-1	K-2	K-3	K-4	K-5	K-6	K-7	K-8	K-9	K-10	JK-11	JK-12	JK-13	JK-14	JK-15	JK-16	JO-17	JO-18	JO-19	JO-20	JO-21	JO-22	Kk	Jm	Je
0	0	0	9.41937e-08	0	0			Cross-correlation	0.734152	±	0.13483		Weights Source 1	0.415215	0.109905	0.059227	0	0	0.54506	0.250296	0.700581	0.513327	0.291098	0.394432	0.628032	0	0.83296	0.906281	0.227635	0.354119	0.38272	0.799781	0.330529	0.403583	0.862138	0.390976	0.681168	0		1
1	0	0	9.45615e-08	0	0			Likeness	0.746508	±	0.0615744		Weights Source 2	0.584425	0.890095	0.940773	0.928395	0.502962	0.11612	0.192542	0.259803	0	0.0571445	0.503689	0.0791855	0.0524558	0.0850397	0.043982	0	0.112266	0.0484013	0	0	0.0431368	0.137862	0.182387	0	0		1
2	0	0	9.49306e-08	0	0			Kuiper V Value	0.125425	±	0.042505		Weights Source 3	0	0	0	0	0	0.183128	0.133741	0	0	0.0228703	0.0182018	0.142636	0.79703	0.06428	0.0497371	0.755703	0.122769	0.195094	0.00527053	0.14336	0.214934	0	0.204875	0.183481	0.257284		1
3	0	0	9.53008e-08	0	0			KS D Value	0.0962655	±	0.0414648		Weights Source 4	0.000359951	0	0	0.0349535	0.128118	0.0567929	0.150822	0.0244163	0.0484408	0.61345	0	0.0345328	0.150515	0.0177203	0	0	0	0.121836	0.032295	0.233492	0.0631089	0	0.10951	0.0656821	0.058742		1
4	0	0	9.56723e-08	0	0								Weights Source 5	0	0	0	0.0366517	0.368919	0.0988983	0.272599	0.0151992	0.438232	0.0154374	0.0836769	0.115614	0	0	0	0.0166618	0.410846	0.251948	0.162654	0.292619	0.275237	0	0.112253	0.0696689	0.683974		1
5	0	0	9.60451e-08	0	0			Number of sink samples	25
6	0	0	9.64191e-08	0	0			Mean Cross-correlation of sink samples	0.177				Cross-correlation	0.698893	0.8422	0.881199	0.769806	0.814678	0.815868	0.672495	0.470323	0.752771	0.979197	0.537084	0.605922	0.839913	0.73211	0.611593	0.829591	0.617372	0.802662	0.560264	0.757667	0.852555	0.501119	0.773172	0.69519	0.940167
7	0	0	9.67943e-08	0	0			Range Cross-correlation of sink samples	0.764				Likeness	0.753561	0.764578	0.807577	0.774555	0.732459	0.852882	0.690685	0.683986	0.748572	0.856844	0.687847	0.751347	0.736419	0.783406	0.7198	0.698297	0.693607	0.82145	0.638574	0.703263	0.807868	0.615875	0.786714	0.751089	0.801438
8	0	0	9.71707e-08	0	0			Mean Kuiper V value of sink samples	0.405				Kuiper V Value	0.105686	0.130685	0.102798	0.129445	0.163584	0.0694846	0.131156	0.116474	0.152315	0.0551593	0.157385	0.0991537	0.155226	0.09933	0.16893	0.168249	0.14639	0.0557249	0.191472	0.139419	0.106567	0.219458	0.0641662	0.129156	0.078217
9	0	0	9.75484e-08	0	0			Range Kuiper V value of sink samples	0.757				KS D Value	0.0813734	0.0697902	0.0719545	0.11359	0.125125	0.0492635	0.126983	0.0890681	0.139767	0.0516159	0.145155	0.0652455	0.136425	0.0536021	0.152665	0.153088	0.0889443	0.0297861	0.115648	0.0787135	0.0906329	0.187289	0.0338572	0.0914449	0.065611
10	0	0	9.79274e-08	0	0			Final Residual	0.0865824
11	0	0	9.83076e-08	0	0			Number of Iterations	260
12	0	0	9.86891e-08	0	0
13	0	0	9.90718e-08	0	0
14	0	0	9.94558e-08	0	0
15	0	0	9.9841e-08	0	0
16	0	0	1.00228e-07	0	0
17	0	0	1.00615e-07	0	0
18	0	0	1.01004e-07	0	0
19	0	0	1.01395e-07	0	0
20	0	0	1.01786e-07	0	0
21	0	0	1.02179e-07	0	0
22	0	0	1.02574e-07	0	0
23	0	0	1.02969e-07	0	0
24	0	0	1.03366e-07	0	0
25	0	0	1.03764e-07	0	0
26	0	0	1.04163e-07	0	0
27	0	0	1.04564e-07	0	0
28	0	0	1.04966e-07	0	0
29	0	0	1.05369e-07	0	0
30	0	0	1.05774e-07	0	0
31	0	0	1.0618e-07	0	0
32	0	0	1.06587e-07	0	0
33	0	0	1.06996e-07	0	0
34	0	0	1.07406e-07	0	0
35	0	0	1.07817e-07	0	0
36	0	0	1.0823e-07	0	0
37	0	0	1.08643e-07	0	0
38	0	0	1.09059e-07	0	0
39	0	0	1.09475e-07	0	0
40	0	0	1.09893e-07	0	0
41	0	0	1.10313e-07	0	0
42	0	0	1.10733e-07	0	0
43	0	0	1.11155e-07	0	0
44	0	0	1.11579e-07	0	0
45	0	0	1.12003e-07	0	0
46	0	0	1.12429e-07	0	0
47	0	0	1.12857e-07	0	0
48	0	0	1.13286e-07	0	0
49	0	0	1.13716e-07	0	0
50	0	0	1.14148e-07	0	0
51	0	0	1.14581e-07	0	0
52	0	0	1.15015e-07	0	0
53	0	0	1.15451e-07	0	0
54	0	0	1.15888e-07	0	0
55	0	0	1.16326e-07	0	0
56	2.52295e-09	5.63743e-10	1.1517e-07	0	0
57	5.9434e-09	1.41073e-09	1.13438e-07	0	0
58	1.02287e-08	2.47289e-09	1.11157e-07	0	0
59	1.55815e-08	3.80219e-09	1.08199e-07	0	0
60	2.22488e-08	5.46418e-09	1.04406e-07	0	0
61	3.053e-08	7.5436e-09	9.95876e-08	0	0
62	4.07874e-08	1.01548e-08	9.35105e-08	0	0
63	5.34571e-08	1.34612e-08	8.58927e-08	0	0
64	6.90611e-08	1.77133e-08	7.63914e-08	0	0
65	8.82201e-08	2.33212e-08	6.45888e-08	0	0
66	1.11666e-07	3.09911e-08	4.99723e-08	0	0
67	1.4025e-07	4.1975e-08	3.1907e-08	0	0
68	1.74954e-07	5.85129e-08	9.59235e-09	0	0
69	2.13869e-07	8.47227e-08	0	0	0
70	2.58532e-07	1.27546e-07	0	0	0
71	3.11619e-07	1.98781e-07	0	0	0
72	3.7426e-07	3.18086e-07	0	0	0
73	4.47716e-07	5.16967e-07	0	0	0
74	5.33595e-07	8.44182e-07	0	0	0
75	6.34349e-07	1.3724e-06	0	0	0
76	7.54232e-07	2.20562e-06	0	0	0
77	9.00961e-07	3.4864e-06	0	0	0
78	1.08831e-06	5.40107e-06	0	0	0
79	1.33983e-06	8.18061e-06	0	0	0
80	1.69364e-06	1.20943e-05	0	0	0
81	2.2081e-06	1.74336e-05	0	0	0
82	2.96739e-06	2.44835e-05	0	0	0
83	4.08595e-06	3.34829e-05	0	0	0
84	5.70984e-06	4.4575e-05	0	0	0
85	8.01308e-06	5.77544e-05	0	0	0
86	1.11873e-05	7.28209e-05	0	0	0
87	1.54236e-05	8.93486e-05	0	0	0
88	2.08874e-05	0.000106684	0	0	0
89	2.76899e-05	0.000123977	0	0	0
90	3.58667e-05	0.000140249	0	0	0
91	4.53898e-05	0.000154481	0	0	0
92	5.62648e-05	0.000165694	0	0	0
93	6.87792e-05	0.000172982	0	0	0
94	8.386e-05	0.000175495	0	0	0
95	0.000103176	0.00017248	0	0	0
96	0.000123024	0.000162192	0	5.47353e-05	0
97	0.000140438	0.000144851	0	0.000188501	0
98	0.000151655	0.000123322	0	0.00032385	3.38492e-05
99	0.000158308	0.000104755	0	0.000419061	6.96737e-05
100	0.000162565	9.6166e-05	0	0.000438214	7.47122e-05
101	0.000164531	0.00010027	0	0.000375153	4.49687e-05
102	0.000163545	0.000114963	0	0.000265146	0
103	0.000154684	0.000134399	0	0.000153202	0
104	0.000149955	0.000157875	0	0.000119304	0
105	0.000158785	0.000183468	0	0.000200093	0
106	0.000194272	0.000204632	0	0.000380054	6.36387e-05
107	0.000260493	0.000203701	0	0.000543093	0.000433778
108	0.000366102	0.000198996	0	0.000684232	0.000991368
109	0.000469906	0.000242962	0	0.000839964	0.00143352
110	0.000528502	0.00038077	0	0.00103372	0.00148276
111	0.000503154	0.00065204	0	0.00130138	0.000952531
112	0.000449068	0.00103556	0	0.00149972	0.000381105
113	0.000325757	0.00157605	0	0.00175764	0
114	0.000170362	0.00204511	0	0.00229369	0
115	0	0.00262772	0	0.00324077	0
116	0	0.00350678	0	0.00386313	0
117	0	0.00223466	0	0.00429331	0
118	0	0.00252559	0	0.00433757	0
119	0	0.00314342	0	0.0046715	0
120	0	0.00402361	0	0.00503637	0
121	0	0.004711	0	0.00484018	0
122	0	0.00396841	0	0.00416766	0
123	0.000146718	0.00290798	0	0.00320009	0
124	0.00036173	0.00207387	0	0.00233002	0
125	0.000370096	0.00166863	0	0.0018243	0
126	0.000341002	0.00142391	0	0.00145984	0
127	0.00033617	0.00125989	0	0.00113672	0
128	0.000323298	0.00121163	0	0.000870582	0
129	0.000267189	0.00131092	0	0.000688697	0
130	0.000181258	0.00146617	0	0.000591456	0
131	0.000123273	0.00144562	0	0.000558169	0
132	0.00012083	0.00116368	0	0.000560954	0
133	0.000121323	0.000802974	0	0.000509572	0.00012482
134	0.000119561	0.000542672	0	0.000428015	0.000204078
135	0.000127151	0.000388752	0	0.000337323	0.000175674
136	0.000138918	0.000302428	0	0.000260785	0.000106057
137	0.000141715	0.000282559	0	0.000226263	5.51508e-05
138	0.000128566	0.000346564	0	0.000247266	3.44074e-05
139	9.80238e-05	0.00049781	0	0.000326986	3.2064e-05
140	5.32185e-05	0.00069124	0	0.000465649	4.59813e-05
141	3.64139e-06	0.000838086	0	0.000664894	8.8297e-05
142	0	0.000874938	0	0.000910344	0.000145314
143	0	0.000858395	0	0.00124944	0.000236098
144	0	0.000873734	0	0.00170358	0.000337611
145	0	0.000935243	0.000183489	0.00221156	0.000373598
146	0	0.000974718	0.000652226	0.00272804	0.000308078
147	0	0.000931218	0.00137635	0.00324921	0.000174484
148	0	0.000818079	0.00231209	0.00377369	6.42717e-05
149	0	0.000695866	0.00333133	0.0043113	0.000151152
150	0	0.000606466	0.00423287	0.00486422	0.000617824
151	0	0.000553176	0.0048068	0.00548387	0.00149295
152	0	0.000528311	0.0049428	0.00639957	0.00255751
153	0	0.000522352	0.0046693	0.00807259	0.00349642
154	0	0.00051326	0.00408509	0.0111376	0.00407094
155	0	0.000480856	0.00328943	0.0163023	0.00405006
156	0	0.000371355	0.0022653	0.0241205	0.00357333
157	0	0	0.000856024	0.0355119	0.00383818
158	0	0	0	0.043228	0.00333568
159	0	0	0	0.0437309	0.0028164
160	0	0	0	0.0405114	0.00361681
161	0	0	0	0.0328142	0.00604758
162	0	0	0	0.023341	0.00950045
163	0	0	0	0.0149599	0.0128709
164	0	0	0	0.00892467	0.0149719
165	0	0	0	0.00487047	0.0159471
166	0	0	0	0.00231381	0.0157579
167	0	2.8863e-05	0	0.000738227	0.0149418
168	0	0.000160011	0	0	0.0142057
169	0	0.000219994	0	0	0.0135649
170	0	0.000193968	0	0	0.0134643
171	0	0.00037963	0	0	0.0117387
172	0	0.000628821	0	0	0.0101293
173	0	0.000988497	0	1.77337e-05	0.0082023
174	0	0.0012659	0	0	0.00625675
175	0	0.00124171	0	0	0.00474638
176	0	0.000978697	4.02016e-05	0	0.00366241
177	0	0.000687675	0.000218233	0	0.00287034
178	3.52107e-05	0.000467739	0.000296923	0	0.00237755
179	0.000138967	0.000295374	0.000284243	0	0.00206999
180	0.000231854	0.000160804	0.000229497	0	0.00186878
181	0.000292804	9.64553e-05	0.000140144	0	0.00167477
182	0.000315205	0.000163962	6.72694e-06	0.000695252	0.00191153
183	0.000236727	0.000533642	0	0.00171215	0.00192042
184	0.000237373	0.000860558	0	0	0.000784512
185	0.000385485	0.000368554	0	0	0.000603598
186	0.000484528	0	0	0	0.000558818
187	0.000476457	0	0	0	0.000612545
188	0.000451041	0	0	0	0.000738073
189	0.000426407	0	0	1.83367e-05	0.000849705
190	0.00041102	0	0	2.97138e-06	0.000905985
191	0.000391294	0	0	0	0.000896267
192	0.000359567	0	0	0	0.000866197
193	0.000321046	0	0	0	0.00086428
194	0.000285877	0	0	0	0.00089191
195	0.000258621	0	0	0	0.000912822
196	0.000236771	0	0	0	0.00090158
197	0.00021511	0	0	0	0.000872186
198	0.000190452	0	0	0	0.000867964
199	0.000163467	0	0	0	0.000918217
200	0.000137815	0	0	0	0.000996981
201	0.000119342	0	0	0	0.0010375
202	0.000114687	0	0	0	0.000994367
203	0.000123928	0	0	4.46622e-05	0.000871482
204	0.00013748	0	0	0.000213979	0.000702265
205	0.000153463	0	0	0.000402767	0.000550869
206	0.000165269	0	0	0.000602092	0.000444519
207	0.000171595	0	0	0.000804826	0.000387169
208	0.000175359	0	0	0.00100456	0.000364995
209	0.000180679	0	0	0.00119491	0.00035648
210	0.000190748	0	0	0.00136878	0.000343192
211	0.000203163	0	4.50386e-05	0.00150448	0.00030726
212	0.000214422	0	0.00017797	0.00158264	0.000243421
213	0.000227058	0	0.000366018	0.00161298	0.000171964
214	0.000243914	0	0.000584967	0.00160599	0.000128407
215	0.00028019	0	0.000758045	0.00156432	0.000233948
216	0.000337305	0	0.000830533	0.00151395	0.00052781
217	0.000426431	0	0.000726998	0.00143562	0.00114865
218	0.000349835	0	0.000942529	0.0016959	0.000764052
219	0.000326722	0	0.000949623	0.00184609	0.000950748
220	0.000275966	0	0.00103444	0.00204676	0.00108605
221	0.000230216	0	0.00118544	0.00224109	0.00131715
222	0.000186741	0	0.00143988	0.00242222	0.00157271
223	0.000129145	0	0.00182213	0.00258163	0.00175623
224	6.22947e-05	0	0.00227998	0.00266103	0.0019612
225	0	0	0.00276963	0.00263553	0.00226345
226	0	0	0.00327772	0.00254857	0.00263185
227	0	0	0.00385879	0.00253461	0.00304975
228	0	0	0.00455629	0.00250938	0.00340635
229	0	0	0.0054096	0.00218935	0.0035591
230	0	0	0.00644801	0.00147879	0.00346851
231	0	0	0.00769907	0.000615444	0.00322185
232	0	0	0.00914999	0	0.00284951
233	0	0	0.0106515	0	0.00229152
234	0	0	0.0119808	0	0.0016986
235	0	0	0.0127964	0	0.0011819
236	0	0	0.0130214	0	0.000825317
237	0	0	0.0128892	0	0.000621005
238	0	0	0.0125519	0.00077169	0.000371661
239	0	0	0.0121589	0.00157185	0.000162987
240	0	0	0.0116581	0.00214695	2.07243e-05
241	0	0	0.0109963	0.0023537	0
242	0	0	0.010215	0.00223803	3.22355e-05
243	0	0	0.00935284	0.00193072	0.000169498
244	3.47736e-05	1.2859e-06	0.00846626	0.00164138	0.000298853
245	0.000112308	2.12822e-05	0.00759917	0.00149205	0.00035275
246	0.000195624	3.19777e-05	0.00679003	0.00150904	0.000347405
247	0.000282356	3.29135e-05	0.00604606	0.00161343	0.000316029
248	0.000362494	2.49168e-05	0.00536025	0.00172557	0.000304208
249	0.000422086	1.01754e-05	0.00472296	0.00180185	0.000339315
250	0.000449598	0	0.00413709	0.00182673	0.000424471
251	0.000444374	0	0.00362604	0.00179379	0.000553172
252	0.000417423	0	0.00322883	0.0016966	0.000721341
253	0.000380647	0	0.00298089	0.00153212	0.0009221
254	0.000344477	0	0.00288123	0.00131858	0.00113827
255	0.000316683	0	0.00287181	0.00110387	0.00134009
256	0.000301254	0	0.00285633	0.000950252	0.00149975
257	0.000296268	0	0.00275864	0.000899299	0.0016105
258	0.00029452	0	0.00257722	0.000943355	0.00168659
259	0.000288757	0	0.00238628	0.0010281	0.00174182
260	0.000276831	0	0.00228337	0.0010833	0.00177305
261	0.000261685	0	0.00233006	0.00105714	0.00176701
262	0.000247552	0	0.00252528	0.000934341	0.00171823
263	0.000237413	0	0.00281304	0.000735383	0.00163597
264	0.000233645	0	0.00310727	0.000503181	0.00153625
265	0.000239094	0	0.00332395	0.000283898	0.00143004
266	0.000255266	0	0.0034168	0.000109089	0.0013149
267	0.000277729	0	0.0034024	0	0.0011687
268	0.000293641	0	0.00335185	0	0.000953618
269	0.000297368	0	0.00336584	0	0.000671187
270	0.000283793	0	0.00348847	0	0.000351518
271	0.000256092	0	0.00369145	0	5.90369e-05
272	0.000198025	0	0.00385821	0	0
273	0.000149982	0	0.00394466	0	0
274	0.000126018	0	0.00390665	0	0
275	0.000123948	0	0.00373646	0	0
276	0.000116488	0	0.00344056	0	0.000127342
277	0.000108217	0	0.00309072	0	0.000305685
278	0.000107791	0	0.00275322	0	0.000445361
279	0.000115578	0	0.00245631	0	0.00052869
280	0.000131664	0	0.00220467	1.78249e-06	0.000556666
281	0.000152364	0	0.00198497	5.68472e-05	0.000537412
282	0.000179081	0	0.00179501	9.3916e-05	0.000505339
283	0.000207757	0	0.00162774	0.000113818	0.00048698
284	0.000233822	0	0.0014798	0.000118338	0.000504291
285	0.000253484	0	0.00134994	0.000110649	0.000568558
286	0.000264582	0	0.00123724	9.53995e-05	0.000678039
287	0.000266773	0	0.00114019	7.81249e-05	0.000820416
288	0.00026129	0	0.00105668	6.42474e-05	0.000978004
289	0.000250702	0	0.00098416	5.83502e-05	0.00113216
290	0.000238824	0	0.000919723	6.41541e-05	0.00126462
291	0.000230542	0	0.000860069	8.49246e-05	0.00135678
292	0.000230992	0	0.000801836	0.000123417	0.00139069
293	0.000243636	1.29642e-06	0.000742734	0.000180531	0.00135418
294	0.000267023	1.35105e-05	0.000683451	0.000252618	0.00124737
295	0.000298329	3.29684e-05	0.000626875	0.00033393	0.00108917
296	0.00033103	6.09249e-05	0.000578977	0.000415563	0.000909047
297	0.00035859	9.80155e-05	0.000546883	0.000489139	0.000736131
298	0.000376882	0.000143655	0.00053713	0.000549131	0.000589373
299	0.000385168	0.000195204	0.000554506	0.000593238	0.000475027
300	0.000385554	0.000247459	0.000601595	0.00062114	0.000390819
301	0.000381667	0.000293109	0.000678703	0.000633047	0.000331897
302	0.000377292	0.000324378	0.000783855	0.000629138	0.000294427
303	0.000375324	0.00033535	0.000912783	0.000610062	0.000275936
304	0.000377144	0.00032398	0.00105902	0.000577816	0.000273866
305	0.000382461	0.000292836	0.00121412	0.000536099	0.000284371
306	0.000389609	0.000248227	0.00136811	0.000489556	0.000302657
307	0.000396197	0.000198099	0.00151002	0.000442026	0.000324824
308	0.000399862	0.000149665	0.00162859	0.000394733	0.000349969
309	0.000398915	0.00010767	0.00171324	0.000345717	0.000380758
310	0.000392724	7.3838e-05	0.00175522	0.000291299	0.00042145
311	0.000381821	4.738e-05	0.00174898	0.000229068	0.000474173
312	0.000367756	2.61306e-05	0.00169344	0.000160586	0.000535813
313	0.000352668	7.7675e-06	0.00159287	9.19258e-05	0.000597752
314	0.000336758	0	0.00145775	3.01815e-05	0.000647344
315	0.000320642	0	0.00130056	0	0.000672888
316	0.000305886	0	0.00113863	0	0.00067193
317	0.000292586	0	0.000992091	0	0.000650769
318	0.00027855	0	0.000873843	0	0.000616801
319	0.000262168	0	0.000791031	0	0.000580558
320	0.000243256	0	0.000745043	0	0.000551918
321	0.000223135	0	0.000733013	0	0.000536262
322	0.00020407	0	0.000749558	0	0.000532616
323	0.000188448	0	0.000787788	0	0.00053486
324	0.000177789	0	0.000838996	5.72207e-06	0.000534221
325	0.000173037	0	0.000894268	1.69368e-05	0.000524355
326	0.00017462	0	0.000945366	2.68519e-05	0.000503377
327	0.000182121	0	0.000984691	3.36053e-05	0.000472388
328	0.000194955	0	0.00100694	3.57462e-05	0.000435075
329	0.0002127	0	0.00100966	3.27544e-05	0.000396072
330	0.000235261	0	0.000993108	2.51486e-05	0.000359433
331	0.000262844	0	0.000959655	1.42557e-05	0.00032754
332	0.000295776	0	0.000912863	1.83307e-06	0.000300641
333	0.000333664	0	0.000855533	0	0.000275577
334	0.000376823	0	0.000792388	0	0.000251194
335	0.000424661	0	0.000725987	0	0.000226886
336	0.000476453	0	0.000655032	0	0.000209431
337	0.000531928	0	0.000573191	0	0.00021735
338	0.000588544	0	0.000478753	0	0.000258006
339	0.000636555	0	0.00039199	0	0.000285654
340	0.000664141	0	0.000341357	0	0.000235088
341	0.000670806	0	0.000323476	0	0.00011896
342	0.000664942	0	0.000308364	1.24221e-05	9.80895e-06
343	0.000644912	0	0.000272811	1.66487e-05	0
344	0.000623098	0	0.000240735	2.05421e-05	0
345	0.000598532	0	0.000219216	2.63265e-05	0
346	0.000572201	0	0.000211349	3.38712e-05	0
347	0.000546455	0	0.000218779	4.36246e-05	0
348	0.000523338	0	0.000242191	5.62766e-05	0
349	0.000503914	0	0.000281165	7.26408e-05	0
350	0.00048804	0	0.000333864	9.3531e-05	0
351	0.000471269	0	0.000392405	0.000111321	2.39799e-05
352	0.000451521	0	0.000451229	0.000124861	7.47293e-05
353	0.000430743	0	0.000508645	0.000141193	0.000127493
354	0.000409385	0	0.000559043	0.000159735	0.000176076
355	0.000389345	0	0.000597366	0.000179203	0.000213541
356	0.00037355	0	0.000619796	0.000198005	0.000233542
357	0.00036509	0	0.000624233	0.00021477	0.000231775
358	0.000366292	0	0.00061047	0.00022877	0.000207092
359	0.000378107	0	0.000580069	0.000240083	0.000161893
360	0.000400002	0	0.000536003	0.000249549	0.00010163
361	0.000430274	0	0.000482139	0.000258665	3.3557e-05
362	0.000461839	0	0.000416259	0.000257711	0
363	0.000493167	0	0.00034372	0.000251947	0
364	0.000527034	0	0.000274924	0.000257648	0
365	0.000561669	0	0.000212836	0.000279272	0
366	0.000595392	0	0.00015915	0.000320397	0
367	0.000626724	0	0.000114479	0.000383039	0
368	0.000654537	0	7.86755e-05	0.000466836	0
369	0.000674382	1.76992e-05	5.21796e-05	0.000564801	0
370	0.000687868	4.56032e-05	3.56505e-05	0.00067061	0
371	0.000697366	7.43526e-05	3.68662e-05	0.000771649	0
372	0.000703268	0.000101856	8.51607e-05	0.000841598	0
373	0.000704836	0.000125906	0.000241428	0.000838624	0
374	0.000701584	0.00014471	0.000557747	0.000726867	0
375	0.00069778	0.000157818	0.000967712	0.000531125	0
376	0.000703946	0.000166437	0.00124601	0.000357589	0
377	0.000728372	0.000172024	0.00119494	0.000304419	0
378	0.000767091	0.000174536	0.000870083	0.000352371	0
379	0.000807254	0.000172754	0.000511771	0.000396147	0
380	0.000839074	0.000166002	0.000288488	0.000365844	0
381	0.000860525	0.00015479	0.000203508	0.000270181	0
382	0.000873539	0.000140197	0.000189658	0.000149844	0
383	0.000880314	0.000123309	0.000197567	3.46404e-05	0
384	0.000878191	0.000103429	0.000199845	0	0
385	0.000872694	8.28794e-05	0.000200633	0	0
386	0.000868422	6.35155e-05	0.000206399	0	0
387	0.000866037	4.56091e-05	0.000217241	0	7.88919e-06
388	0.000865703	2.91979e-05	0.00023283	0	3.11844e-05
389	0.000871766	1.59115e-05	0.0002597	0	4.43961e-05
390	0.000883786	5.52418e-06	0.00029697	0	4.9202e-05
391	0.000900109	0	0.000342603	0	4.77698e-05
392	0.00091904	0	0.000393538	0	4.26768e-05
393	0.00094036	0	0.000445981	0	3.70883e-05
394	0.000963346	0	0.000496793	0	3.22906e-05
395	0.000987996	0	0.000543809	0	2.8521e-05
396	0.00101472	0	0.000586179	0	2.52333e-05
397	0.00104373	0	0.000624302	0	2.16466e-05
398	0.00107454	0	0.000659402	0	1.73397e-05
399	0.00110577	0	0.000692942	0	1.26233e-05
400	0.00113556	0	0.000726088	0	8.52656e-06
401	0.00116084	0	0.000756481	2.5934e-05	2.71841e-06
402	0.0011807	0	0.000783683	7.29632e-05	0
403	0.00119671	0	0.000808605	0.000128977	0
404	0.00121051	0	0.000829877	0.000196142	0
405	0.00122369	0	0.000844981	0.00027622	0
406	0.00123745	0	0.000850643	0.000370901	1.85392e-06
407	0.00125284	0	0.000843549	0.000482173	6.98076e-06
408	0.00127151	0	0.000821628	0.000613314	1.13424e-05
409	0.00129478	0	0.000782943	0.00076537	1.36423e-05
410	0.00132394	0	0.000726539	0.000937502	1.28806e-05
411	0.00135507	2.56575e-05	0.0006546	0.00112322	4.74555e-06
412	0.00139045	6.23212e-05	0.000566168	0.00131721	0
413	0.00143527	8.43839e-05	0.000462918	0.00151867	0
414	0.00148986	8.79253e-05	0.000349759	0.00172456	0
415	0.00155197	7.38044e-05	0.000231612	0.00192964	0
416	0.00161774	4.73923e-05	0.000113786	0.0021282	0
417	0.00168271	1.63055e-05	1.39155e-06	0.0023142	0
418	0.00172776	0	0	0.0024384	0
419	0.00176532	0	0	0.00253956	0
420	0.00179913	0	0	0.00261468	0
421	0.00183026	0	0	0.0026566	0
422	0.00186015	0	0	0.00265896	0
423	0.00188996	0	0	0.00261813	0
424	0.0019199	0	0	0.00253495	0
425	0.00194899	0	0	0.00241564	0
426	0.00197514	0	0	0.00227142	0
427	0.00199561	0	0	0.00211676	0
428	0.00200764	0	0	0.00196649	0
429	0.00200927	0	0	0.00183606	0
430	0.00200097	0	0	0.00177114	0
431	0.00197603	0	0.000103619	0.00188753	0
432	0.00194586	0	0.00022581	0.00230386	3.20723e-05
433	0.00188344	0	0.000335884	0.00246093	0.000195924
434	0.00182948	0	0.000507157	0.00195957	8.67517e-05
435	0.00176556	0	0.00069889	0.00121353	0
436	0.00170446	0	0.00090533	0.000717472	0
437	0.00165809	0	0.0011265	0.000408712	0
438	0.00162413	0	0.00133376	0.000151465	0
439	0.00159758	0	0.00148575	0	0
440	0.00157587	0	0.00155387	0	0
441	0.00156943	0	0.00155247	0	0
442	0.00157422	0	0.00148993	0	0
443	0.00158466	0	0.00138516	0	0
444	0.00159509	0	0.00125955	0	0
445	0.00160082	0	0.00113078	0	0
446	0.00159879	0	0.00101053	0	0
447	0.00158762	0	0.000905093	0	0
448	0.00156742	0	0.00081696	0	0
449	0.00153947	0	0.000745855	0	0
450	0.00149992	0	0.000678697	7.49619e-05	0
451	0.00145721	0	0.000622943	0.000147681	0
452	0.00141403	0	0.000575206	0.00021367	0
453	0.0013724	0	0.000532192	0.000271242	0
454	0.00133378	0	0.000491694	0.000318585	0
455	0.00129898	0	0.000452755	0.000353838	0
456	0.00126829	0	0.000415466	0.00037534	0
457	0.00124153	0	0.00038061	0.000381936	0
458	0.00121831	0	0.000349284	0.000373236	0
459	0.00119806	0	0.000322594	0.000349752	0
460	0.00118014	0	0.000301417	0.000312919	0
461	0.00116383	0	0.000286247	0.000264981	0
462	0.00114837	0	0.000277119	0.000208797	0
463	0.00113291	0	0.000273601	0.000147572	0
464	0.00111656	0	0.000274875	8.45678e-05	0
465	0.00109844	0	0.000279859	2.28025e-05	0
466	0.00107499	0	0.000282316	0	0
467	0.001047	0	0.000283661	0	0
468	0.00101596	0	0.000286243	0	0
469	0.00098191	0	0.000289106	0	0
470	0.000945213	0	0.000291237	0	0
471	0.000906564	0	0.000291567	0	0
472	0.000866868	0	0.000289036	0	0
473	0.000827057	0	0.000282736	0	0
474	0.000787909	0	0.000272096	0	0
475	0.000749919	0	0.000257032	0	0
476	0.000713273	0	0.000238024	0	0
477	0.000677916	0	0.000216063	0	0
478	0.00064368	0	0.000192521	0	0
479	0.000610406	0	0.00016896	0	0
480	0.000578044	0	0.000146938	0	0
481	0.000546696	0	0.000127862	0	0
482	0.000516629	0	0.000112874	0	0
483	0.000488254	0	0.000102803	0	0
484	0.0004621	0	9.81403e-05	0	0
485	0.000438785	0	9.90638e-05	0	0
486	0.000418968	0	0.000105475	0	0
487	0.000403296	0	0.000117068	0	0
488	0.000392322	0	0.000133424	0	0
489	0.000386439	0	0.000154178	0	0
490	0.000386081	0	0.000179604	0	0
491	0.00039295	0	0.000212592	0	0
492	0.000400517	0	0.000243152	6.30777e-05	4.11273e-05
493	0.000403325	0	0.000262394	0.000294589	0.00014168
494	0.000404072	0	0.000279866	0.000608578	0.00027909
495	0.000403767	0	0.000306883	0.000796751	0.000372261
496	0.000403097	0	0.000352033	0.000700231	0.00035952
497	0.00039944	0	0.000408951	0.000430768	0.000285988
498	0.000389507	0	0.000465079	0.000211094	0.000240037
499	0.0003732	0	0.000515666	0.000120679	0.000252309
500	0.000353176	0	0.000563045	0.000109954	0.000301206
501	0.000332602	0	0.000609978	0.000122558	0.000361338
502	0.000314129	0	0.000657635	0.00013379	0.000418969
503	0.000299722	0	0.00070649	0.000135734	0.000466541
504	0.00029059	0	0.000757037	0.000124967	0.000498381
505	0.000287158	0	0.000809956	9.96185e-05	0.00051018
506	0.000289133	0	0.000866042	5.95943e-05	0.000499656
507	0.000295668	0	0.000926092	7.02747e-06	0.000467123
508	0.000302602	0	0.000984839	0	0.000407816
509	0.000311017	0	0.00104754	0	0.000333167
510	0.000320269	0	0.0011156	0	0.000251262
511	0.000329375	0	0.00118909	0	0.000169076
512	0.000337416	0	0.00126727	0	9.24345e-05
513	0.00034357	0	0.00134861	0	2.54384e-05
514	0.000342348	0	0.00142392	0	0
515	0.000336013	0	0.00149439	0	0
516	0.000328421	0	0.00156296	0	0
517	0.000319481	0	0.00162673	0	0
518	0.000309337	0	0.00168334	0	0
519	0.00029835	0	0.00173124	0	0
520	0.000287058	0	0.00176983	0	0
521	0.000276093	0	0.00179938	0	0
522	0.000266113	0	0.00182077	0	0
523	0.000257619	5.12169e-07	0.00183514	0	0
524	0.000250407	4.75867e-06	0.00184355	0	0
525	0.000246064	7.84956e-06	0.00184648	0	0
526	0.000244965	9.6882e-06	0.0018439	0	0
527	0.00024737	1.02953e-05	0.0018352	0	0
528	0.000253426	9.79478e-06	0.00181938	0	0
529	0.000263178	8.38648e-06	0.00179538	0	0
530	0.000276565	6.31194e-06	0.00176238	0	0
531	0.000293414	3.81991e-06	0.00172011	0	0
532	0.000313443	1.13671e-06	0.001669	0	0
533	0.000335892	0	0.00161027	0	0
534	0.00036038	0	0.00154569	0	0
535	0.00038659	0	0.00147747	0	0
536	0.000413857	0	0.00140791	0	0
537	0.00044014	0	0.00133699	1.05092e-05	3.03279e-06
538	0.000463342	0	0.00126493	1.99044e-05	2.29257e-05
539	0.00048489	0	0.00119625	2.53922e-05	4.7421e-05
540	0.000504127	0	0.00113176	2.70933e-05	7.57156e-05
541	0.00052045	0	0.00107175	2.54862e-05	0.000106686
542	0.000533342	0	0.00101604	2.13284e-05	0.000138991
543	0.00054241	0	0.000964102	1.55394e-05	0.000171193
544	0.00054743	0	0.000915246	9.06842e-06	0.000201903
545	0.000548395	0	0.000868714	2.77032e-06	0.0002299
546	0.000545392	0	0.000823514	0	0.000253842
547	0.000538967	0	0.000779216	0	0.000273253
548	0.000529984	0	0.000735759	0	0.000288226
549	0.000519309	0	0.000692935	0	0.000298699
550	0.000507891	0	0.000650685	0	0.000304791
551	0.000496686	0	0.000609082	0	0.000306741
552	0.000486594	0	0.000568306	0	0.000304844
553	0.000478407	0	0.000528629	0	0.000299411
554	0.000472778	0	0.0004904	0	0.000290746
555	0.000470153	0	0.000453904	1.14079e-06	0.000278982
556	0.000470779	0	0.000419368	5.54235e-06	0.00026411
557	0.00047502	0	0.000387541	1.08259e-05	0.000246783
558	0.000482973	0	0.000358883	1.71998e-05	0.000227304
559	0.000494616	0	0.00033381	2.48888e-05	0.000205997
560	0.000509812	0	0.000312656	3.41178e-05	0.000183199
561	0.000528315	0	0.000295635	4.51034e-05	0.000159236
562	0.000549772	0	0.000282811	5.80545e-05	0.000134398
563	0.000573742	0	0.000274089	7.31797e-05	0.000108907
564	0.000599723	0	0.000269217	9.06995e-05	8.28908e-05
565	0.000627186	0	0.000267816	0.000110859	5.6365e-05
566	0.000655614	0	0.000269417	0.000133938	2.92266e-05
567	0.000684544	0	0.000273516	0.000160245	1.26296e-06
568	0.00070982	0	0.000274495	0.000180643	0
569	0.00073457	0	0.000276548	0.000203978	0
570	0.000758744	0	0.000279509	0.00023081	0
571	0.00078222	0	0.000283107	0.000261168	0
572	0.000804949	0	0.000287214	0.000294941	0
573	0.000826932	0	0.000291852	0.000331838	0
574	0.000848182	0	0.000297191	0.000371362	0
575	0.000868697	0	0.000303532	0.000412807	0
576	0.000888435	0	0.000311298	0.000455269	0
577	0.000907304	0	0.000320999	0.000497682	0
578	0.000925158	0	0.000333212	0.000538877	0
579	0.000941804	0	0.000348544	0.00057765	0
580	0.000957017	0	0.000367596	0.000612842	0
581	0.000970554	0	0.000390923	0.000643425	0
582	0.000982173	0	0.000418996	0.000668575	0
583	0.000991645	0	0.000452166	0.000687741	0
584	0.000998772	0	0.000490633	0.000700692	0
585	0.00100339	0	0.000534422	0.000707536	0
586	0.00100538	0	0.000583363	0.000708724	0
587	0.00100469	0	0.000637086	0.000705015	0
588	0.00100128	0	0.00069502	0.000697419	0
589	0.000995221	0	0.000756405	0.000687119	0
590	0.000986596	0	0.000820316	0.000675379	0
591	0.000975556	0	0.000885701	0.000663441	0
592	0.000962282	0	0.000951431	0.000652433	0
593	0.00094698	0	0.00101636	0.000643278	0
594	0.000929863	0	0.00107938	0.000636637	0
595	0.000911138	0	0.00113951	0.00063286	0
596	0.000891004	0	0.00119592	0.000631986	0
597	0.000869646	0	0.00124801	0.000633751	0
598	0.000847251	0	0.00129536	0.000637638	0
599	0.000824024	0	0.00133782	0.000642935	0
600	0.000800206	0	0.00137539	0.000648812	0
601	0.000776093	0	0.00140825	0.000654394	0
602	0.000752045	0	0.00143662	0.000658829	0
603	0.000728486	0	0.00146078	0.000661346	0
604	0.000705888	0	0.00148093	0.000661299	0
605	0.000684744	0	0.00149722	0.000658194	0
606	0.000665536	0	0.00150969	0.00065171	0
607	0.000648692	0	0.00151826	0.000641716	0
608	0.000634553	0	0.0015228	0.000628278	0
609	0.000623344	0	0.00152312	0.000611671	0
610	0.00061515	0	0.00151903	0.000592377	0
611	0.000609908	0	0.00151042	0.000571081	0
612	0.000607411	0	0.00149722	0.000548651	0
613	0.000607314	0	0.0014795	0.00052609	0
614	0.000609161	0	0.00145742	0.000504487	0
615	0.000612406	0	0.00143124	0.000484933	0
616	0.000616446	0	0.0014013	0.000468442	0
617	0.000620658	0	0.00136799	0.000455865	0
618	0.000624432	0	0.00133176	0.000447804	0
619	0.000627204	0	0.00129309	0.000444555	0
620	0.000628488	0	0.00125249	0.000446064	0
621	0.000627902	0	0.00121055	0.000451912	0
622	0.000625181	0	0.00116789	0.000461332	0
623	0.000620195	0	0.00112522	0.000473244	0
624	0.000612948	0	0.00108329	0.000486328	0
625	0.000603574	0	0.00104293	0.000499095	0
626	0.000592326	0	0.00100498	0.000509992	0
627	0.000579554	0	0.000970233	0.000517491	0
628	0.000565684	0	0.000939411	0.000520191	0
629	0.000551189	0	0.000913089	0.0005169	0
630	0.000536554	0	0.000891645	0.000506714	0
631	0.000522247	0	0.000875222	0.000489068	0
632	0.000508693	0	0.000863709	0.000463765	0
633	0.000496244	0	0.000856752	0.000430984	0
634	0.000485166	0	0.000853782	0.000391253	0
635	0.000475626	0	0.00085409	0.000345399	0
636	0.000467691	0	0.000856923	0.000294462	0
637	0.000461335	0	0.000861609	0.000239593	0
638	0.000456441	0	0.000867707	0.000181928	0
639	0.000452825	0	0.000875154	0.000122459	0
640	0.000450242	0	0.000884372	6.19314e-05	0
641	0.00044841	0	0.00089628	7.8722e-07	0
642	0.000442263	0	0.000903425	0	0
643	0.000436183	0	0.000915667	0	0
644	0.000429987	0	0.000933942	0	0
645	0.000423536	0	0.000958002	0	0
646	0.000416839	0	0.000986017	0	0
647	0.000410079	0	0.00101433	0	0
648	0.0004036	0	0.00103768	0	0
649	0.000397838	0	0.00104992	0	0
650	0.000393229	0	0.00104522	0	0
651	0.000390089	0	0.00101935	0	0
652	0.000388526	0	0.00097076	0	0
653	0.000388391	0	0.000901063	0	0
654	0.000389303	0	0.000814806	0	0
655	0.000390722	0	0.000718531	0	0
656	0.000392065	0	0.00061948	0	0
657	0.000392814	0	0.000524285	0	0
658	0.000392591	0	0.000438005	0	0
659	0.000391201	0	0.000363667	0	0
660	0.000388616	0	0.000302327	0	0
661	0.000384936	0	0.000253492	0	0
662	0.000380339	0	0.000215698	0	0
663	0.000372438	0	0.000183336	0	1.59555e-05
664	0.000362785	0	0.000156459	0	3.95024e-05
665	0.000352848	0	0.000135267	0	6.26035e-05
666	0.000342743	0	0.000118389	0	8.53113e-05
667	0.000332575	0	0.000104792	0	0.000107522
668	0.000322439	0	9.37226e-05	0	0.000129009
669	0.000312417	0	8.46312e-05	0	0.000149465
670	0.000302578	0	7.71159e-05	0	0.000168533
671	0.000292986	0	7.08805e-05	0	0.000185842
672	0.000283692	0	6.57105e-05	0	0.000201026
673	0.000274743	0	6.14578e-05	0	0.000213756
674	0.000266175	0	5.80283e-05	0	0.000223759
675	0.000258018	0	5.53686e-05	0	0.000230838
676	0.00025029	0	5.34493e-05	0	0.000234894
677	0.000242995	0	5.22467e-05	0	0.000235939
678	0.000236123	0	5.17243e-05	0	0.0002341
679	0.000229643	0	5.18173e-05	0	0.000229623
680	0.000223508	0	5.24243e-05	0	0.000222859
681	0.000217651	0	5.34067e-05	0	0.000214244
682	0.000211997	0	5.45969e-05	0	0.000204272
683	0.000206465	0	5.58139e-05	0	0.000193464
684	0.00020098	0	5.68833e-05	0	0.000182337
685	0.00019548	0	5.7658e-05	0	0.000171367
686	0.000189926	0	5.80354e-05	0	0.000160969
687	0.000184306	0	5.79684e-05	0	0.000151475
688	0.000178637	0	5.74675e-05	0	0.000143121
689	0.000172571	0	5.58127e-05	7.10939e-06	0.000135025
690	0.000166183	0	5.31207e-05	2.11945e-05	0.000127248
691	0.00015997	0	5.03535e-05	3.46478e-05	0.000120843
692	0.000154021	0	4.76503e-05	4.7378e-05	0.000115711
693	0.000148422	0	4.51395e-05	5.92823e-05	0.000111696
694	0.000143245	0	4.29272e-05	7.02448e-05	0.000108608
695	0.000138547	0	4.10892e-05	8.01384e-05	0.000106233
696	0.000134363	0	3.96683e-05	8.88328e-05	0.000104355
697	0.000130703	0	3.86755e-05	9.62048e-05	0.000102761
698	0.000127557	0	3.80942e-05	0.00010215	0.000101252
699	0.000124893	0	3.78855e-05	0.000106592	9.96567e-05
700	0.000122665	0	3.79953e-05	0.000109495	9.78283e-05
701	0.000120809	0	3.83601e-05	0.000110865	9.56533e-05
702	0.000119258	0	3.89125e-05	0.000110752	9.30507e-05
703	0.000117938	0	3.95852e-05	0.000109249	8.99725e-05
704	0.000116777	0	4.03148e-05	0.000106486	8.64017e-05
705	0.000115707	0	4.10435e-05	0.000102622	8.23495e-05
706	0.000114668	0	4.17211e-05	9.78369e-05	7.78511e-05
707	0.000113611	0	4.2306e-05	9.23212e-05	7.29614e-05
708	0.0001125	0	4.27653e-05	8.62674e-05	6.77501e-05
709	0.000111309	0	4.30752e-05	7.98615e-05	6.22962e-05
710	0.000110027	0	4.32205e-05	7.32769e-05	5.66838e-05
711	0.000108571	4.22985e-07	4.32253e-05	6.66082e-05	5.09337e-05
712	0.000106652	2.77127e-06	4.32002e-05	5.97754e-05	4.49005e-05
713	0.000104667	5.11835e-06	4.30088e-05	5.31603e-05	3.89513e-05
714	0.000102636	7.44873e-06	4.26596e-05	4.68495e-05	3.31568e-05
715	0.000100586	9.74875e-06	4.21642e-05	4.09054e-05	2.75784e-05
716	9.85374e-05	1.2007e-05	4.15356e-05	3.53681e-05	2.22676e-05
717	9.65119e-05	1.42146e-05	4.07867e-05	3.02572e-05	1.72663e-05
718	9.45245e-05	1.63653e-05	3.99295e-05	2.55751e-05	1.26067e-05
719	9.25859e-05	1.84552e-05	3.89741e-05	2.13093e-05	8.31216e-06
720	9.07027e-05	2.04823e-05	3.79289e-05	1.74354e-05	4.3978e-06
721	8.88781e-05	2.24462e-05	3.68002e-05	1.39202e-05	8.71245e-07
722	8.68304e-05	2.42379e-05	3.51704e-05	9.97384e-06	0
723	8.47853e-05	2.5943e-05	3.33759e-05	6.14021e-06	0
724	8.28565e-05	2.76015e-05	3.15825e-05	2.65677e-06	0
725	8.10152e-05	2.91954e-05	2.97182e-05	0	0
726	7.91411e-05	3.06673e-05	2.75177e-05	0	0
727	7.74444e-05	3.20786e-05	2.53657e-05	0	0
728	7.59509e-05	3.3416e-05	2.32685e-05	0	0
729	7.46925e-05	3.4664e-05	2.12375e-05	0	0
730	7.3706e-05	3.58051e-05	1.92899e-05	0	0
731	7.30298e-05	3.68217e-05	1.74487e-05	0	0
732	7.27014e-05	3.76964e-05	1.57426e-05	0	0
733	7.2754e-05	3.8414e-05	1.42052e-05	0	0
734	7.32134e-05	3.89627e-05	1.28744e-05	0	0
735	7.40948e-05	3.93355e-05	1.17913e-05	0	0
736	7.54004e-05	3.95314e-05	1.09985e-05	0	0
737	7.71181e-05	3.95573e-05	1.05386e-05	0	0
738	7.92201e-05	3.94281e-05	1.04526e-05	0	0
739	8.16631e-05	3.91689e-05	1.07776e-05	0	0
740	8.43889e-05	3.88148e-05	1.15455e-05	0	0
741	8.73258e-05	3.84123e-05	1.2781e-05	0	0
742	8.97884e-05	3.77889e-05	1.35544e-05	0	4.04084e-06
743	9.21838e-05	3.72058e-05	1.4658e-05	0	8.77204e-06
744	9.44684e-05	3.6766e-05	1.61769e-05	0	1.38259e-05
745	9.65594e-05	3.65696e-05	1.81319e-05	0	1.90741e-05
746	9.83768e-05	3.67274e-05	2.0542e-05	0	2.43677e-05
747	9.98446e-05	3.73578e-05	2.34239e-05	0	2.95473e-05
748	0.000100893	3.85827e-05	2.6792e-05	0	3.4454e-05
749	0.000101458	4.05217e-05	3.06571e-05	0	3.89418e-05
750	0.000101486	4.32857e-05	3.50262e-05	0	4.28897e-05
751	0.000100929	4.69682e-05	3.99009e-05	0	4.62112e-05
752	9.9754e-05	5.16377e-05	4.5276e-05	0	4.88606e-05
753	9.79388e-05	5.73279e-05	5.11383e-05	0	5.0836e-05
754	9.54777e-05	6.40301e-05	5.7464e-05	0	5.21767e-05
755	9.23829e-05	7.16862e-05	6.42175e-05	0	5.2957e-05
756	8.86866e-05	8.01832e-05	7.13495e-05	0	5.3276e-05
757	8.4443e-05	8.93524e-05	7.87959e-05	0	5.32461e-05
758	7.97286e-05	9.89705e-05	8.64771e-05	0	5.29792e-05
759	7.46417e-05	0.000108766	9.42984e-05	0	5.25756e-05
760	6.92996e-05	0.000118429	0.00010215	0	5.21146e-05
761	6.38354e-05	0.000127625	0.000109912	0	5.16485e-05
762	5.83916e-05	0.000136015	0.000117453	0	5.12017e-05
763	5.31143e-05	0.000143268	0.000124637	0	5.07737e-05
764	4.81452e-05	0.000149087	0.000131328	0	5.03457e-05
765	4.36146e-05	0.000153226	0.000137394	0	4.989e-05
766	3.96343e-05	0.000155502	0.000142709	0	4.93803e-05
767	3.62924e-05	0.000155812	0.000147164	0	4.88021e-05
768	3.3649e-05	0.000154134	0.000150664	0	4.81608e-05
769	3.17349e-05	0.000150532	0.000153137	0	4.74872e-05
770	3.05518e-05	0.000145146	0.00015453	0	4.68392e-05
771	3.00749e-05	0.000138187	0.000154817	0	4.63e-05
772	3.02568e-05	0.000129915	0.000153993	0	4.59727e-05
773	3.10331e-05	0.000120627	0.000152079	0	4.59724e-05
774	3.23286e-05	0.000110635	0.000149114	0	4.64165e-05
775	3.40629e-05	0.000100249	0.00014516	0	4.74147e-05
776	3.61562e-05	8.97598e-05	0.000140294	0	4.90592e-05
777	3.85338e-05	7.94262e-05	0.000134608	0	5.14167e-05
778	4.11291e-05	6.94648e-05	0.000128206	0	5.4523e-05
779	4.3886e-05	6.0045e-05	0.000121203	0	5.8379e-05
780	4.67591e-05	5.12878e-05	0.000113717	0	6.2951e-05
781	4.97132e-05	4.32678e-05	0.000105873	0	6.81723e-05
782	5.27218e-05	3.60181e-05	9.77941e-05	0	7.39474e-05
783	5.57647e-05	2.95373e-05	8.96047e-05	0	8.01582e-05
784	5.88261e-05	2.37971e-05	8.14241e-05	0	8.66703e-05
785	6.18918e-05	1.87505e-05	7.33656e-05	0	9.33411e-05
786	6.49473e-05	1.4339e-05	6.55344e-05	0	0.000100027
787	6.79761e-05	1.04993e-05	5.80252e-05	0	0.000106589
788	7.09585e-05	7.16809e-06	5.09208e-05	0	0.0001129
789	7.38714e-05	4.28615e-06	4.42909e-05	0	0.000118852
790	7.6688e-05	1.80042e-06	3.8191e-05	0	0.000124353
791	7.93102e-05	0	3.26819e-05	0	0.000129278
792	8.1471e-05	0	2.7858e-05	0	0.000133383
793	8.34993e-05	0	2.36308e-05	0	0.000136948
794	8.53585e-05	0	2.00045e-05	0	0.000139965
795	8.7015e-05	0	1.69733e-05	0	0.000142444
796	8.84398e-05	0	1.45239e-05	0	0.000144408
797	8.96087e-05	0	1.26378e-05	0	0.000145891
798	9.05039e-05	0	1.12941e-05	0	0.000146929
799	9.11137e-05	0	1.04718e-05	0	0.000147561
800	9.14332e-05	0	1.01521e-05	0	0.000147822
801	9.14638e-05	0	1.03197e-05	0	0.000147739
802	9.12129e-05	0	1.09649e-05	0	0.000147332
803	9.06934e-05	0	1.20833e-05	0	0.000146609
804	8.99223e-05	0	1.36766e-05	0	0.000145569
805	8.89202e-05	0	1.57519e-05	0	0.000144202
806	8.77094e-05	0	1.83208e-05	0	0.000142489
807	8.63135e-05	0	2.13978e-05	0	0.000140407
808	8.47554e-05	0	2.49993e-05	0	0.000137934
809	8.30569e-05	0	2.91413e-05	0	0.000135049
810	8.12374e-05	0	3.38379e-05	0	0.000131737
811	7.9313e-05	0	3.90995e-05	0	0.000127995
812	7.72968e-05	0	4.49314e-05	0	0.000123831
813	7.51977e-05	0	5.13325e-05	0	0.000119274
814	7.28288e-05	9.41953e-07	5.8349e-05	0	0.000114204
815	7.03838e-05	1.88638e-06	6.591e-05	0	0.000108846
816	6.78637e-05	2.8247e-06	7.39903e-05	0	0.000103283
817	6.52663e-05	3.75117e-06	8.25569e-05	0	9.76153e-05
818	6.25882e-05	4.66033e-06	9.15689e-05	0	9.19591e-05
819	5.98258e-05	5.547e-06	0.000100978	0	8.64426e-05
820	5.69761e-05	6.40632e-06	0.00011073	0	8.12028e-05
821	5.40377e-05	7.23378e-06	0.000120764	0	7.63815e-05
822	5.10124e-05	8.02533e-06	0.000131015	0	7.2121e-05
823	4.79059e-05	8.77749e-06	0.000141413	0	6.85594e-05
824	4.47282e-05	9.48751e-06	0.000151887	0	6.58265e-05
825	4.14947e-05	1.01535e-05	0.000162363	0	6.404e-05
826	3.82265e-05	1.07745e-05	0.000172765	0	6.33013e-05
827	3.49497e-05	1.13506e-05	0.000183019	0	6.36924e-05
828	3.16957e-05	1.18829e-05	0.000193051	0	6.52726e-05
829	2.84998e-05	1.23738e-05	0.000202789	0	6.80747e-05
830	2.54007e-05	1.28266e-05	0.000212165	0	7.21021e-05
831	2.24382e-05	1.32454e-05	0.000221117	0	7.73244e-05
832	1.96521e-05	1.36354e-05	0.000229588	0	8.3674e-05
833	1.70801e-05	1.40022e-05	0.000237527	0	9.10419e-05
834	1.47561e-05	1.43523e-05	0.000244894	0	9.92747e-05
835	1.27082e-05	1.46922e-05	0.000251658	0	0.000108173
836	1.09575e-05	1.50287e-05	0.000257799	0	0.00011749
837	9.51704e-06	1.53683e-05	0.000263305	0	0.000126937
838	8.39093e-06	1.57174e-05	0.000268178	0	0.000136188
839	7.57458e-06	1.60819e-05	0.000272428	0	0.000144891
840	7.05504e-06	1.64665e-05	0.000276072	0	0.000152685
841	6.81209e-06	1.6875e-05	0.000279137	0	0.000159215
842	6.81962e-06	1.73098e-05	0.00028165	0	0.000164155
843	7.0474e-06	1.77718e-05	0.000283644	0	0.000167229
844	7.463e-06	1.82599e-05	0.000285151	0	0.000168231
845	8.0337e-06	1.87713e-05	0.000286201	0	0.000167043
846	8.72827e-06	1.93012e-05	0.000286822	0	0.000163646
847	9.51846e-06	1.98432e-05	0.000287036	0	0.000158122
848	1.03802e-05	2.03895e-05	0.000286864	0	0.000150656
849	1.12941e-05	2.09314e-05	0.000286323	0	0.000141521
850	1.22462e-05	2.14595e-05	0.000285431	0	0.000131062
851	1.32274e-05	2.19644e-05	0.000284203	0	0.000119673
852	1.42329e-05	2.24375e-05	0.000282658	0	0.000107772
853	1.52621e-05	2.28712e-05	0.000280822	0	9.57718e-05
854	1.61039e-05	2.31796e-05	0.000278261	4.1667e-06	8.34748e-05
855	1.66696e-05	2.33239e-05	0.000274812	1.43159e-05	7.09628e-05
856	1.72868e-05	2.34225e-05	0.000271222	2.4146e-05	5.93938e-05
857	1.7968e-05	2.3478e-05	0.000267561	3.35183e-05	4.89874e-05
858	1.87229e-05	2.34941e-05	0.0002639	4.23444e-05	3.98804e-05
859	1.95576e-05	2.34753e-05	0.000260312	5.05848e-05	3.21298e-05
860	2.04748e-05	2.34267e-05	0.000256865	5.82452e-05	2.57214e-05
861	2.14739e-05	2.33535e-05	0.000253627	6.53691e-05	2.05818e-05
862	2.25512e-05	2.32614e-05	0.000250659	7.20298e-05	1.65931e-05
863	2.37009e-05	2.31558e-05	0.000248016	7.83211e-05	1.36068e-05
864	2.49151e-05	2.30417e-05	0.000245741	8.43486e-05	1.14589e-05
865	2.61849e-05	2.29239e-05	0.000243871	9.02226e-05	9.98145e-06
866	2.75006e-05	2.28066e-05	0.00024243	9.60509e-05	9.01273e-06
867	2.88522e-05	2.26932e-05	0.000241429	0.000101935	8.40479e-06
868	3.023e-05	2.25868e-05	0.000240867	0.000107965	8.0281e-06
869	3.16244e-05	2.24897e-05	0.00024073	0.000114219	7.77417e-06
870	3.30267e-05	2.24034e-05	0.000240991	0.000120764	7.55618e-06
871	3.44284e-05	2.23292e-05	0.000241613	0.000127651	7.30817e-06
872	3.5822e-05	2.22677e-05	0.000242546	0.000134923	6.98326e-06
873	3.72009e-05	2.22189e-05	0.000243732	0.000142607	6.55123e-06
874	3.8559e-05	2.21829e-05	0.000245107	0.000150725	5.99585e-06
875	3.98912e-05	2.21589e-05	0.0002466	0.000159288	5.31219e-06
876	4.11934e-05	2.21463e-05	0.000248136	0.000168301	4.50402e-06
877	4.24622e-05	2.21441e-05	0.000249641	0.000177764	3.58154e-06
878	4.36955e-05	2.21512e-05	0.000251042	0.00018767	2.55932e-06
879	4.48919e-05	2.21666e-05	0.000252269	0.000198012	1.45457e-06
880	4.60516e-05	2.2189e-05	0.000253258	0.000208776	2.85719e-07
881	4.70592e-05	2.21726e-05	0.000253781	0.000219641	0
882	4.79943e-05	2.21458e-05	0.000253905	0.000230793	0
883	4.88982e-05	2.21222e-05	0.000253651	0.000242314	0
884	4.97775e-05	2.21014e-05	0.000252998	0.000254189	0
885	5.06399e-05	2.20833e-05	0.000251938	0.000266401	0
886	5.14935e-05	2.20675e-05	0.000250474	0.000278931	0
887	5.23476e-05	2.2054e-05	0.000248621	0.00029176	0
888	5.32116e-05	2.20427e-05	0.000246408	0.000304864	0
889	5.40956e-05	2.20336e-05	0.000243873	0.00031822	0
890	5.50099e-05	2.20269e-05	0.000241065	0.000331804	0
891	5.59648e-05	2.20232e-05	0.000238042	0.00034559	0
892	5.69706e-05	2.2023e-05	0.000234869	0.000359549	0
893	5.80374e-05	2.20276e-05	0.000231616	0.000373655	0
894	5.91749e-05	2.20386e-05	0.000228357	0.000387878	0
895	6.03922e-05	2.20581e-05	0.000225167	0.000402188	0
896	6.16979e-05	2.20889e-05	0.000222123	0.000416555	0
897	6.30998e-05	2.21348e-05	0.000219296	0.000430948	0
898	6.46049e-05	2.22004e-05	0.000216757	0.000445339	0
899	6.62195e-05	2.22916e-05	0.00021457	0.000459697	0
900	6.79488e-05	2.24155e-05	0.000212794	0.000473994	0
901	6.97973e-05	2.25808e-05	0.000211476	0.000488203	0
902	7.17685e-05	2.27976e-05	0.00021066	0.000502299	0
903	7.3865e-05	2.30779e-05	0.000210377	0.000516259	0
904	7.60888e-05	2.34353e-05	0.00021065	0.000530063	0
905	7.84408e-05	2.38853e-05	0.000211492	0.000543694	0
906	8.09215e-05	2.44446e-05	0.000212906	0.000557138	0
907	8.35306e-05	2.51313e-05	0.00021489	0.000570384	0
908	8.62676e-05	2.59641e-05	0.000217431	0.000583425	0
909	8.91315e-05	2.69618e-05	0.000220512	0.000596255	0
910	9.21214e-05	2.81425e-05	0.00022411	0.000608871	0
911	9.52364e-05	2.95225e-05	0.000228199	0.000621268	0
912	9.84761e-05	3.11151e-05	0.000232752	0.000633443	0
913	0.000101841	3.29298e-05	0.000237742	0.000645389	0
914	0.000105331	3.49705e-05	0.000243144	0.000657097	0
915	0.000108949	3.72349e-05	0.000248935	0.000668551	0
916	0.000112698	3.97133e-05	0.0002551	0.000679732	0
917	0.000116582	4.23878e-05	0.000261627	0.000690611	0
918	0.000120606	4.52324e-05	0.000268515	0.000701154	0
919	0.000124776	4.82126e-05	0.000275768	0.00071132	0
920	0.000129099	5.12868e-05	0.0002834	0.000721065	0
921	0.00013358	5.44065e-05	0.000291432	0.000730339	0
922	0.000138223	5.75189e-05	0.000299896	0.000739094	0
923	0.000143033	6.05685e-05	0.000308828	0.000747286	0
924	0.000148009	6.34994e-05	0.000318272	0.000754876	0
925	0.000153148	6.62582e-05	0.000328277	0.00076184	0
926	0.000158444	6.87964e-05	0.000338894	0.000768164	0
927	0.000163885	7.10725e-05	0.000350177	0.000773858	0
928	0.000169452	7.30544e-05	0.000362179	0.000778949	0
929	0.000175124	7.47205e-05	0.000374953	0.000783488	0
930	0.000180873	7.60603e-05	0.000388547	0.000787549	0
931	0.000186666	7.70752e-05	0.000403004	0.000791228	0
932	0.000192467	7.77772e-05	0.000418361	0.00079464	0
933	0.000198237	7.8188e-05	0.000434647	0.000797919	0
934	0.000203935	7.83373e-05	0.000451882	0.000801209	0
935	0.000209519	7.82603e-05	0.000470078	0.000804663	0
936	0.000214951	7.79957e-05	0.000489234	0.000808434	0
937	0.000220193	7.75833e-05	0.000509342	0.000812673	0
938	0.000225212	7.70615e-05	0.00053038	0.000817525	0
939	0.000229982	7.64657e-05	0.000552317	0.000823119	0
940	0.000234482	7.58265e-05	0.00057511	0.00082957	0
941	0.000238698	7.51689e-05	0.000598707	0.000836973	0
942	0.000242625	7.45117e-05	0.000623044	0.000845404	0
943	0.000246265	7.38674e-05	0.000648049	0.000854918	0
944	0.000249628	7.32427e-05	0.00067364	0.000865548	0
945	0.000252734	7.26392e-05	0.000699727	0.000877309	0
946	0.000255606	7.20545e-05	0.000726214	0.000890195	0
947	0.000258278	7.14834e-05	0.000752998	0.000904188	0
948	0.000260787	7.09188e-05	0.000779972	0.000919255	0
949	0.000263175	7.03533e-05	0.000807026	0.000935349	0
950	0.000265491	6.97802e-05	0.000834047	0.000952419	0
951	0.000267783	6.91942e-05	0.000860923	0.000970403	0
952	0.000270105	6.8592e-05	0.000887543	0.000989237	0
953	0.000272511	6.79733e-05	0.000913798	0.00100885	0
954	0.000275054	6.73406e-05	0.000939583	0.00102918	0
955	0.00027779	6.66997e-05	0.000964799	0.00105015	0
956	0.000280771	6.60592e-05	0.000989352	0.0010717	0
957	0.000284048	6.54306e-05	0.00101316	0.00109374	0
958	0.000287672	6.4828e-05	0.00103613	0.00111623	0
959	0.000291689	6.42677e-05	0.00105821	0.00113909	0
960	0.000296141	6.37677e-05	0.00107932	0.00116225	0
961	0.000301067	6.33474e-05	0.00109942	0.00118566	0
962	0.000306502	6.30271e-05	0.00111846	0.00120926	0
963	0.000312476	6.28277e-05	0.00113639	0.00123298	0
964	0.000319014	6.27701e-05	0.00115318	0.00125678	0
965	0.000326137	6.28752e-05	0.00116882	0.00128059	0
966	0.00033386	6.31631e-05	0.00118327	0.00130437	0
967	0.000342193	6.36532e-05	0.00119652	0.00132806	0
968	0.000351141	6.43639e-05	0.00120855	0.00135162	0
969	0.000360705	6.53119e-05	0.00121937	0.00137499	0
970	0.000370882	6.65124e-05	0.00122895	0.00139812	0
971	0.000381663	6.7979e-05	0.00123731	0.00142098	0
972	0.000393036	6.97228e-05	0.00124444	0.00144351	0
973	0.000404988	7.1753e-05	0.00125033	0.00146566	0
974	0.000417501	7.40764e-05	0.001255	0.0014874	0
975	0.000430555	7.6697e-05	0.00125845	0.00150868	0
976	0.00044413	7.96163e-05	0.00126069	0.00152945	0
977	0.000457903	8.27166e-05	0.00126128	0.00154887	2.41581e-06
978	0.000470711	8.5556e-05	0.00125855	0.0015639	1.63442e-05
979	0.000483862	8.86374e-05	0.00125449	0.00157799	3.11871e-05
980	0.000497332	9.19494e-05	0.00124912	0.0015911	4.69711e-05
981	0.000511099	9.54785e-05	0.00124248	0.00160318	6.37174e-05
982	0.000525145	9.92087e-05	0.0012346	0.0016142	8.14408e-05
983	0.000539454	0.000103123	0.00122553	0.0016241	0.00010015
984	0.000554014	0.000107201	0.00121531	0.00163287	0.000119845
985	0.000568817	0.000111425	0.00120402	0.00164046	0.000140519
986	0.00058386	0.000115776	0.00119172	0.00164686	0.000162156
987	0.000599142	0.000120237	0.00117849	0.00165203	0.00018473
988	0.00061467	0.000124793	0.0011644	0.00165598	0.000208207
989	0.000630453	0.000129436	0.00114957	0.00165868	0.000232539
990	0.000646507	0.000134161	0.00113407	0.00166012	0.00025767
991	0.000662852	0.000138973	0.00111801	0.00166031	0.00028353
992	0.000679513	0.000143885	0.0011015	0.00165923	0.000310036
993	0.000696522	0.000148922	0.00108464	0.00165688	0.000337093
994	0.000713911	0.000154117	0.00106755	0.00165327	0.000364594
995	0.000731718	0.000159512	0.00105032	0.0016484	0.000392419
996	0.000749981	0.000165157	0.00103307	0.00164227	0.00042044
997	0.000768737	0.000171105	0.00101589	0.0016349	0.00044852
998	0.000788019	0.000177407	0.000998893	0.0016263	0.00047652
999	0.000807855	0.000184107	0.000982165	0.0016165	0.0005043
1000	0.000828258	0.00019123	0.000965799	0.00160554	0.000531729
1001	0.000849229	0.00019878	0.000949881	0.00159348	0.000558687
1002	0.000870747	0.000206727	0.000934493	0.00158037	0.000585072
1003	0.00089277	0.000215007	0.000919711	0.00156631	0.000610806
1004	0.000915229	0.000223515	0.000905605	0.00155142	0.00063584
1005	0.000938029	0.000232107	0.000892241	0.00153583	0.000660153
1006	0.000961047	0.000240604	0.00087968	0.00151968	0.000683758
1007	0.000984137	0.000248806	0.000867974	0.00150314	0.000706693
1008	0.00100713	0.0002565	0.00085717	0.00148639	0.000729023
1009	0.00102986	0.000263483	0.000847303	0.00146958	0.000750828
1010	0.00105212	0.000269577	0.000838401	0.0014529	0.000772196
1011	0.00107373	0.000274652	0.000830481	0.00143646	0.000793217
1012	0.00109453	0.000278642	0.000823545	0.00142041	0.000813966
1013	0.00111435	0.000281559	0.000817586	0.0014048	0.000834501
1014	0.00113307	0.0002835	0.000812579	0.00138969	0.000854854
1015	0.00115059	0.000284645	0.00080849	0.00137508	0.000875024
1016	0.00116684	0.000285257	0.00080527	0.00136092	0.000894981
1017	0.00118179	0.000285664	0.000802861	0.00134714	0.000914661
1018	0.00119546	0.000286243	0.000801192	0.00133361	0.000933974
1019	0.00120786	0.000287407	0.000800187	0.00132022	0.000952808
1020	0.00121907	0.000289579	0.000799763	0.00130681	0.000971036
1021	0.00122916	0.000293188	0.000799836	0.0012932	0.000988524
1022	0.00123822	0.000298656	0.00080032	0.00127926	0.00100514
1023	0.0012463	0.000306398	0.000801134	0.00126481	0.00102074
1024	0.00125349	0.000316826	0.000802204	0.00124973	0.00103523
1025	0.0012598	0.000330344	0.000803464	0.00123387	0.00104849
1026	0.00126524	0.000347332	0.00080486	0.00121716	0.00106046
1027	0.00126976	0.000368115	0.000806346	0.00119952	0.0010711
1028	0.0012733	0.000392895	0.000807888	0.00118096	0.00108042
1029	0.00127576	0.000421662	0.000809456	0.00116153	0.0010885
1030	0.00127702	0.000454088	0.00081102	0.0011414	0.00109553
1031	0.001277	0.000489431	0.000812543	0.00112081	0.00110178
1032	0.00127563	0.000526474	0.000813979	0.00110013	0.00110763
1033	0.00127289	0.000563537	0.000815265	0.00107983	0.00111355
1034	0.00126881	0.000598583	0.000816327	0.00106043	0.00112008
1035	0.00126347	0.000629423	0.000817079	0.00104249	0.00112775
1036	0.001257	0.000653988	0.000817435	0.00102653	0.00113705
1037	0.00124955	0.000670625	0.000817317	0.00101292	0.00114831
1038	0.00124129	0.00067836	0.00081666	0.00100193	0.00116171
1039	0.00123236	0.000677052	0.000815421	0.000993576	0.00117717
1040	0.00122294	0.000667409	0.000813577	0.000987703	0.00119442
1041	0.00121316	0.000650867	0.000811121	0.000983971	0.00121296
1042	0.00120319	0.000629338	0.000808049	0.00098192	0.00123219
1043	0.00119323	0.000604909	0.000804358	0.00098103	0.00125144
1044	0.00118351	0.000579538	0.000800029	0.000980793	0.00127004
1045	0.00117428	0.000554822	0.000795028	0.000980763	0.00128741
1046	0.00116585	0.000531847	0.000789299	0.000980597	0.00130309
1047	0.00115854	0.000511161	0.000782776	0.000980067	0.00131675
1048	0.00115266	0.000492828	0.000775383	0.000979055	0.00132821
1049	0.00114847	0.000476536	0.000767048	0.000977538	0.0013374
1050	0.00114622	0.000461742	0.000757712	0.000975562	0.00134436
1051	0.00114605	0.0004478	0.000747333	0.000973217	0.00134919
1052	0.00114803	0.00043407	0.0007359	0.000970617	0.00135205
1053	0.00115216	0.000419994	0.00072343	0.000967878	0.00135314
1054	0.00115831	0.000405139	0.000709969	0.000965111	0.00135267
1055	0.00116632	0.000389214	0.000695597	0.000962414	0.00135087
1056	0.00117591	0.000372072	0.000680417	0.000959861	0.00134798
1057	0.00118677	0.000353699	0.000664557	0.00095751	0.00134424
1058	0.00119853	0.000334196	0.000648163	0.000955395	0.00133988
1059	0.0012108	0.000313758	0.000631391	0.00095353	0.00133514
1060	0.00122316	0.000292652	0.000614404	0.00095191	0.00133023
1061	0.00123519	0.000271201	0.000597363	0.000950516	0.00132536
1062	0.00124651	0.00024976	0.00058042	0.000949313	0.00132071
1063	0.00125673	0.000228701	0.000563716	0.000948256	0.00131646
1064	0.00126555	0.000208402	0.000547373	0.000947295	0.00131272
1065	0.00127267	0.00018924	0.000531491	0.000946374	0.00130961
1066	0.00127789	0.000171576	0.000516145	0.000945436	0.0013072
1067	0.00128104	0.000155756	0.000501387	0.000944422	0.00130552
1068	0.00128203	0.0001421	0.000487244	0.000943276	0.00130458
1069	0.00128083	0.000130892	0.000473719	0.000941943	0.00130435
1070	0.00127745	0.000122363	0.0004608	0.000940366	0.00130476
1071	0.00127199	0.000116665	0.000448455	0.000938485	0.00130573
1072	0.00126458	0.000113845	0.000436642	0.000936236	0.00130715
1073	0.00125541	0.000113814	0.000425311	0.000933548	0.00130892
1074	0.00124475	0.000116317	0.000414406	0.000930335	0.00131091
1075	0.00123287	0.000120918	0.000403871	0.000926502	0.001313
1076	0.00122012	0.000126993	0.000393649	0.000921941	0.00131508
1077	0.00120685	0.000133761	0.000383687	0.000916533	0.00131705
1078	0.00119345	0.000140316	0.000373938	0.000910153	0.00131881
1079	0.00118029	0.000145708	0.00036436	0.00090268	0.00132029
1080	0.00116774	0.000149016	0.000354919	0.000894001	0.0013214
1081	0.00115609	0.000149448	0.000345589	0.000884021	0.00132209
1082	0.00114559	0.000146419	0.000336352	0.000872674	0.00132226
1083	0.0011364	0.000139616	0.000327202	0.000859927	0.00132185
1084	0.00112861	0.000129037	0.000318138	0.000845781	0.00132078
1085	0.00112221	0.000114983	0.000309166	0.000830278	0.00131896
1086	0.00111713	9.80252e-05	0.000300298	0.00081349	0.00131629
1087	0.00111324	7.89353e-05	0.000291551	0.000795515	0.0013127
1088	0.00111038	5.86004e-05	0.000282941	0.00077647	0.00130811
1089	0.00110836	3.79302e-05	0.000274482	0.000756481	0.00130245
1090	0.00110702	1.77714e-05	0.00026619	0.000735673	0.00129568
1091	0.00110597	0	0.000258159	0.000714003	0.00128761
1092	0.0011022	0	0.00025149	0.000689478	0.00127599
1093	0.00109919	0	0.000244846	0.000664761	0.00126359
1094	0.00109692	0	0.000238213	0.000639964	0.00125049
1095	0.0010954	0	0.000231585	0.000615164	0.00123677
1096	0.00109463	0	0.000224962	0.000590412	0.0012225
1097	0.00109458	0	0.000218349	0.000565748	0.00120774
1098	0.00109527	0	0.000211755	0.000541203	0.00119258
1099	0.00109666	0	0.00020519	0.000516808	0.00117709
1100	0.00109875	0	0.000198663	0.000492599	0.00116136
1101	0.00110152	0	0.000192183	0.000468618	0.00114547
1102	0.00110493	0	0.000185759	0.000444917	0.00112952
1103	0.00110895	0	0.000179398	0.000421552	0.00111359
1104	0.00111357	0	0.000173105	0.000398586	0.00109778
1105	0.00111872	0	0.000166884	0.000376083	0.00108219
1106	0.00112439	0	0.00016074	0.000354108	0.0010669
1107	0.00113052	0	0.000154675	0.000332724	0.00105201
1108	0.00113709	0	0.000148691	0.00031199	0.00103761
1109	0.00114404	0	0.000142789	0.000291958	0.00102378
1110	0.00115135	0	0.000136969	0.000272675	0.00101059
1111	0.00115899	0	0.000131229	0.000254179	0.000998117
1112	0.00116693	0	0.000125565	0.000236498	0.000986427
1113	0.00117516	0	0.000119969	0.000219653	0.000975574
1114	0.00118367	0	0.000114429	0.000203653	0.000965606
1115	0.00119249	0	0.00010893	0.000188494	0.000956555
1116	0.00120164	0	0.000103449	0.000174163	0.000948441
1117	0.00121116	0	9.79591e-05	0.000160631	0.00094127
1118	0.00122112	0	9.24243e-05	0.000147859	0.000935027
1119	0.00123161	0	8.68039e-05	0.00013579	0.000929678
1120	0.00124272	0	8.10516e-05	0.000124357	0.000925169
1121	0.00125458	0	7.51174e-05	0.000113478	0.000921427
1122	0.00126728	0	6.89513e-05	0.000103061	0.000918358
1123	0.00128095	0	6.25069e-05	9.30081e-05	0.000915855
1124	0.00129565	0	5.57468e-05	8.32181e-05	0.000913805
1125	0.00131144	0	4.86488e-05	7.3594e-05	0.000912088
1126	0.00132748	4.19335e-06	4.15211e-05	6.34551e-05	0.000909961
1127	0.00134425	9.68236e-06	3.41761e-05	5.31439e-05	0.000907768
1128	0.00136188	1.49823e-05	2.65626e-05	4.28285e-05	0.000905661
1129	0.00138011	2.00011e-05	1.87674e-05	3.25117e-05	0.000903616
1130	0.00139861	2.464e-05	1.09128e-05	2.22347e-05	0.000901643
1131	0.00141694	2.87965e-05	3.15389e-06	1.20781e-05	0.000899789
1132	0.00143417	3.24906e-05	0	8.04303e-07	0.00089717
1133	0.0014492	3.53994e-05	0	0	0.000892388
1134	0.00146247	3.75253e-05	0	0	0.000888175
1135	0.0014735	3.88136e-05	0	0	0.00088487
1136	0.00148182	3.92178e-05	0	0	0.000882649
1137	0.00148704	3.8717e-05	0	0	0.000881641
1138	0.00148888	3.73176e-05	0	0	0.000881913
1139	0.00148724	3.50528e-05	0	0	0.000883454
1140	0.00148213	3.19808e-05	0	0	0.000886171
1141	0.00147374	2.81812e-05	0	0	0.000889892
1142	0.00146239	2.37493e-05	0	0	0.000894376
1143	0.0014485	1.87909e-05	0	0	0.000899333
1144	0.00143261	1.3416e-05	0	0	0.000904442
1145	0.00141529	7.733e-06	0	0	0.000909378
1146	0.00139713	1.84437e-06	0	0	0.000913835
1147	0.00137786	0	0	0	0.0009169
1148	0.00135803	0	3.89659e-06	0	0.000917656
1149	0.0013386	0	1.04426e-05	0	0.000916603
1150	0.00132028	0	1.65368e-05	0	0.000914529
1151	0.00130336	0	2.20437e-05	0	0.000911484
1152	0.00128804	0	2.6863e-05	0	0.000907572
1153	0.00127443	0	3.09271e-05	0	0.00090294
1154	0.00126237	0	3.38086e-05	3.51845e-06	0.000897261
1155	0.00125196	0	3.57676e-05	8.02577e-06	0.000891098
1156	0.00124323	0	3.69347e-05	1.23157e-05	0.000884827
1157	0.00123607	0	3.73192e-05	1.63707e-05	0.000878651
1158	0.00123038	0	3.69359e-05	2.01702e-05	0.000872754
1159	0.00122608	0	3.5801e-05	2.3687e-05	0.000867298
1160	0.00122306	0	3.39299e-05	2.68851e-05	0.000862418
1161	0.00122127	0	3.13362e-05	2.97193e-05	0.000858213
1162	0.00122063	0	2.80323e-05	3.2137e-05	0.000854753
1163	0.00122111	0	2.40309e-05	3.40819e-05	0.000852077
1164	0.00122266	0	1.9349e-05	3.54998e-05	0.000850196
1165	0.00122522	0	1.40115e-05	3.63462e-05	0.000849104
1166	0.0012287	0	8.05645e-06	3.65941e-05	0.000848781
1167	0.00122857	2.25602e-05	3.20383e-06	3.30456e-05	0.000845791
1168	0.00122834	4.79892e-05	0	2.79225e-05	0.000842662
1169	0.00122793	7.49906e-05	0	2.09879e-05	0.000839225
1170	0.0012277	0.000101836	0	1.35677e-05	0.000836417
1171	0.00122773	0.000126667	0	6.03726e-06	0.000834489
1172	0.001228	0.000147603	0	0	0.000833472
1173	0.0012283	0.000162955	0	0	0.000832834
1174	0.001229	0.000171673	0	0	0.000833743
1175	0.00123005	0.000173219	0	0	0.000836198
1176	0.00123129	0.000167729	0	0	0.000840045
1177	0.00123253	0.000155952	0	0	0.000844997
1178	0.00123352	0.000139106	0	0	0.000850666
1179	0.00123401	0.000118674	0	0	0.000856612
1180	0.00123374	9.61827e-05	0	0	0.000862392
1181	0.00123251	7.30205e-05	0	0	0.000867606
1182	0.00123015	5.03059e-05	0	0	0.000871928
1183	0.00122659	2.8832e-05	0	0	0.000875118
1184	0.00122178	9.07488e-06	0	0	0.00087702
1185	0.001214	0	0	0	0.000876196
1186	0.00120362	0	0	0	0.000872881
1187	0.0011925	0	0	0	0.0008685
1188	0.00118069	0	0	0	0.000863087
1189	0.00116827	0	0	0	0.000856697
1190	0.00115528	0	0	0	0.000849405
1191	0.00114178	0	0	0	0.000841299
1192	0.00112781	0	0	0	0.000832485
1193	0.00111341	0	0	0	0.000823082
1194	0.0010986	0	0	0	0.000813217
1195	0.00108337	0	0	0	0.000803024
1196	0.00106773	0	0	0	0.000792639
1197	0.00105167	0	0	0	0.000782192
1198	0.00103518	0	0	0	0.000771806
1199	0.00101827	0	0	0	0.000761588
1200	0.00100093	0	0	0	0.000751626
1201	0.000983189	0	0	0	0.000741988
1202	0.000965089	0	0	0	0.000732716
1203	0.000946683	0	0	0	0.000723831
1204	0.000928045	0	0	0	0.000715331
1205	0.000909264	0	0	0	0.000707192
1206	0.000890441	0	0	0	0.000699377
1207	0.000871682	0	0	0	0.000691835
1208	0.000853099	0	0	0	0.000684509
1209	0.000834799	0	0	0	0.000677341
1210	0.000816886	0	0	0	0.000670274
1211	0.00079945	0	0	0	0.000663257
1212	0.00078257	0	0	0	0.000656249
1213	0.000766311	0	0	0	0.00064922
1214	0.000750721	0	0	0	0.000642149
1215	0.000735835	0	0	0	0.000635032
1216	0.000721672	0	0	0	0.000627871
1217	0.000708242	0	0	0	0.000620681
1218	0.000695543	0	0	0	0.000613483
1219	0.000683565	0	0	0	0.000606307
1220	0.000672293	0	0	0	0.000599185
1221	0.000661708	0	0	0	0.000592153
1222	0.000651788	0	0	0	0.000585247
1223	0.000642511	0	0	0	0.000578504
1224	0.000633853	0	0	0	0.000571959
1225	0.000625793	0	0	0	0.000565645
1226	0.000618308	0	0	0	0.000559591
1227	0.000611378	0	0	0	0.000553825
1228	0.000604981	0	0	0	0.000548371
1229	0.0005991	0	0	0	0.000543249
1230	0.000593716	0	0	0	0.000538477
1231	0.000588811	0	0	0	0.000534067
1232	0.000584369	0	0	0	0.000530033
1233	0.000580374	0	0	0	0.000526381
1234	0.000576773	0	0	5.62755e-07	0.00052302
1235	0.000573476	0	0	2.81548e-06	0.000519756
1236	0.000570602	0	0	4.79368e-06	0.000516932
1237	0.000568142	0	0	6.42437e-06	0.000514559
1238	0.000566088	0	0	7.63651e-06	0.000512647
1239	0.000564433	0	0	8.3626e-06	0.0005112
1240	0.000563167	0	0	8.54029e-06	0.000510223
1241	0.000562281	0	0	8.11405e-06	0.000509714
1242	0.000561762	0	0	7.03677e-06	0.00050967
1243	0.000561596	0	0	5.27126e-06	0.000510083
1244	0.000561764	0	0	2.7917e-06	0.000510938
1245	0.000562216	0	0	0	0.000512144
1246	0.000562715	0	0	0	0.000513135
1247	0.000563417	0	0	0	0.000514367
1248	0.000564286	0	0	0	0.000515803
1249	0.000565279	0	0	0	0.000517403
1250	0.000566351	0	0	0	0.000519118
1251	0.00056745	0	0	0	0.000520896
1252	0.000568524	0	0	0	0.000522675
1253	0.000569514	0	0	0	0.00052439
1254	0.000570366	0	0	0	0.000525967
1255	0.000571022	0	0	0	0.000527329
1256	0.000571429	0	0	0	0.000528393
1257	0.00057154	0	0	0	0.000529074
1258	0.000571313	0	0	0	0.000529284
1259	0.000570716	0	0	0	0.000528937
1260	0.000569727	0	0	0	0.000527946
1261	0.000568336	0	0	0	0.000526232
1262	0.000566546	0	0	0	0.000523721
1263	0.000564373	0	0	0	0.000520348
1264	0.000561845	0	0	0	0.000516058
1265	0.000559001	0	0	0	0.000510814
1266	0.000555892	0	0	0	0.000504592
1267	0.000552573	0	0	0	0.000497384
1268	0.000549105	0	0	0	0.000489205
1269	0.000545552	0	0	0	0.000480087
1270	0.000541974	0	0	0	0.000470083
1271	0.000538427	0	0	0	0.000459266
1272	0.00053496	0	0	0	0.000447727
1273	0.000531612	0	0	0	0.000435576
1274	0.000528409	0	0	0	0.000422935
1275	0.000525367	0	0	0	0.00040994
1276	0.000522486	0	0	0	0.000396736
1277	0.000519756	0	0	0	0.00038347
1278	0.000517157	0	0	0	0.00037029
1279	0.000514662	0	0	0	0.000357343
1280	0.000512238	0	0	0	0.000344762
1281	0.00050985	0	0	0	0.000332674
1282	0.000507466	0	0	0	0.000321186
1283	0.000505059	0	0	0	0.000310387
1284	0.00050261	0	0	0	0.000300347
1285	0.000500109	0	0	0	0.000291113
1286	0.000497561	0	0	0	0.000282708
1287	0.00049498	0	0	0	0.000275136
1288	0.000492319	3.9299e-07	0	0	0.000268318
1289	0.000489307	2.73704e-06	0	0	0.000261975
1290	0.00048639	5.03798e-06	0	0	0.000256368
1291	0.000483625	7.29092e-06	0	0	0.000251434
1292	0.000481073	9.49065e-06	0	0	0.000247106
1293	0.000478797	1.16322e-05	0	0	0.00024331
1294	0.000476856	1.37112e-05	0	0	0.000239974
1295	0.000475305	1.57248e-05	0	0	0.000237029
1296	0.000474187	1.76715e-05	0	0	0.000234412
1297	0.000473534	1.9552e-05	0	0	0.000232072
1298	0.000473367	2.13693e-05	0	0	0.000229966
1299	0.000473689	2.31287e-05	0	0	0.000228065
1300	0.00047449	2.48377e-05	0	0	0.000226353
1301	0.000475744	2.65062e-05	0	0	0.000224826
1302	0.000477412	2.81458e-05	0	0	0.000223492
1303	0.000479442	2.97693e-05	0	0	0.000222369
1304	0.000481774	3.13907e-05	0	0	0.000221485
1305	0.000484338	3.30241e-05	0	0	0.000220873
1306	0.00048706	3.46834e-05	0	0	0.000220571
1307	0.000489866	3.63815e-05	0	0	0.000220617
1308	0.00049268	3.81299e-05	0	0	0.00022105
1309	0.000494864	3.97909e-05	0	8.86918e-06	0.000220387
1310	0.000496846	4.15001e-05	0	1.8857e-05	0.000219986
1311	0.000498601	4.32698e-05	0	2.94784e-05	0.000219952
1312	0.000500078	4.51013e-05	0	4.07327e-05	0.000220302
1313	0.00050124	4.69928e-05	0	5.2607e-05	0.000221045
1314	0.000502059	4.89395e-05	0	6.50755e-05	0.000222183
1315	0.00050252	5.09339e-05	0	7.81004e-05	0.000223712
1316	0.00050262	5.29657e-05	0	9.16323e-05	0.00022562
1317	0.000502366	5.50222e-05	0	0.000105611	0.000227888
1318	0.000501774	5.70886e-05	0	0.000119969	0.000230493
1319	0.00050087	5.91488e-05	0	0.000134628	0.000233407
1320	0.000499685	6.11851e-05	0	0.000149506	0.0002366
1321	0.000498256	6.31795e-05	0	0.000164519	0.000240036
1322	0.000496626	6.51138e-05	0	0.000179577	0.000243684
1323	0.000494836	6.69701e-05	0	0.000194593	0.000247508
1324	0.000492931	6.87314e-05	0	0.00020948	0.000251477
1325	0.000490953	7.0382e-05	0	0.000224155	0.000255562
1326	0.000488943	7.19077e-05	0	0.00023854	0.000259737
1327	0.000486939	7.32967e-05	0	0.000252561	0.00026398
1328	0.000484976	7.45392e-05	0	0.000266152	0.000268275
1329	0.000483083	7.56281e-05	0	0.000279253	0.000272611
1330	0.000481286	7.65589e-05	0	0.000291813	0.000276979
1331	0.000479606	7.73299e-05	0	0.000303786	0.000281378
1332	0.00047806	7.79423e-05	0	0.000315136	0.00028581
1333	0.00047666	7.84e-05	0	0.000325831	0.00029028
1334	0.000475417	7.87101e-05	0	0.000335847	0.000294798
1335	0.000474335	7.88823e-05	0	0.000345162	0.000299373
1336	0.000473417	7.89296e-05	0	0.00035376	0.000304019
1337	0.000472666	7.88687e-05	0	0.000361627	0.000308749
1338	0.000472082	7.8721e-05	0	0.000368747	0.000313574
1339	0.000471666	7.85142e-05	0	0.000375103	0.000318507
1340	0.000471421	7.82848e-05	0	0.000380674	0.000323557
1341	0.000471353	7.80826e-05	0	0.000385426	0.000328733
1342	0.000471474	7.79752e-05	0	0.000389312	0.00033404
1343	0.000471806	7.80542e-05	0	0.000392265	0.000339481
1344	0.000472381	7.84417e-05	0	0.000394192	0.000345056
1345	0.000473244	7.92942e-05	0	0.00039497	0.000350765
1346	0.000474452	8.08027e-05	0	0.000394446	0.000356603
1347	0.000476075	8.31857e-05	0	0.000392444	0.000362565
1348	0.000478184	8.66713e-05	0	0.000388779	0.000368642
1349	0.000480846	9.14684e-05	0	0.000383279	0.000374821
1350	0.000484105	9.77265e-05	0	0.00037582	0.000381085
1351	0.000487968	0.000105489	0	0.000366365	0.00038741
1352	0.000492386	0.000114648	0	0.000354996	0.000393764
1353	0.000497244	0.000124914	0	0.000341945	0.000400107
1354	0.000502358	0.000135807	0	0.000327599	0.000406388
1355	0.000507487	0.000146684	0	0.000312479	0.000412551
1356	0.000512352	0.000156798	0	0.000297193	0.000418536
1357	0.000516674	0.000165392	0	0.00028236	0.000424286
1358	0.000520214	0.000171806	0	0.000268529	0.000429748
1359	0.000522807	0.000175574	0	0.000256093	0.000434881
1360	0.000524395	0.000176498	0	0.000245235	0.000439659
1361	0.000525033	0.000174685	0	0.000235901	0.000444073
1362	0.000524887	0.000170515	0	0.000227815	0.00044813
1363	0.000524206	0.000164586	0	0.000220533	0.000451847
1364	0.000523287	0.00015761	0	0.000213521	0.000455252
1365	0.000522439	0.000150309	0	0.000206236	0.00045837
1366	0.000521944	0.000143318	0	0.000198205	0.000461226
1367	0.000522037	0.000137119	0	0.000189076	0.000463838
1368	0.000522891	0.000132004	0	0.000178642	0.000466209
1369	0.000524624	0.000128079	0	0.000166837	0.000468334
1370	0.000527165	0.000125334	1.49758e-06	0.000153244	0.00046986
1371	0.000530293	0.000123679	7.27526e-06	0.00013712	0.000470133
1372	0.000534466	0.000122752	1.28842e-05	0.00012003	0.000470105
1373	0.000539728	0.000122294	1.83122e-05	0.000102152	0.000469729
1374	0.000546133	0.000122047	2.35432e-05	8.3646e-05	0.000468953
1375	0.000553753	0.000121787	2.85566e-05	6.46425e-05	0.000467727
1376	0.00056267	0.000121322	3.33288e-05	4.52387e-05	0.000466007
1377	0.000572958	0.000120505	3.78373e-05	2.55061e-05	0.000463764
1378	0.000584673	0.000119225	4.20663e-05	5.50266e-06	0.000460996
1379	0.000597069	0.000117123	4.43773e-05	0	0.000455669
1380	0.000610552	0.000114327	4.57978e-05	0	0.000449136
1381	0.00062526	0.000110921	4.69969e-05	0	0.000442324
1382	0.000640949	0.000106907	4.80683e-05	0	0.000435457
1383	0.000657263	0.000102308	4.91453e-05	0	0.00042884
1384	0.000673741	9.71615e-05	5.03994e-05	0	0.000422852
1385	0.00068983	9.15211e-05	5.20346e-05	0	0.000417937
1386	0.000704913	8.54509e-05	5.42775e-05	0	0.000414588
1387	0.000718348	7.90227e-05	5.7362e-05	0	0.000413321
1388	0.000729515	7.23119e-05	6.1512e-05	0	0.000414642
1389	0.000737867	6.53939e-05	6.6923e-05	0	0.000419012
1390	0.000742978	5.83397e-05	7.37436e-05	0	0.000426813
1391	0.000744586	5.12129e-05	8.20608e-05	0	0.000438317
1392	0.000742623	4.40674e-05	9.18908e-05	0	0.000453664
1393	0.000737224	3.69464e-05	0.000103175	0	0.000472848
1394	0.00072872	2.98821e-05	0.000115786	0	0.000495716
1395	0.000717614	2.28974e-05	0.000129535	0	0.000521982
1396	0.000704541	1.60083e-05	0.000144195	0	0.000551245
1397	0.000690212	9.22692e-06	0.000159518	0	0.000583022
1398	0.000675356	2.56489e-06	0.000175257	0	0.000616781
1399	0.00065986	0	0.000191421	0	0.000651298
1400	0.000644646	0	0.000207741	0	0.000686313
1401	0.000630727	0	0.000223945	0	0.000721795
1402	0.000618447	0	0.000239971	0	0.000757337
1403	0.000607996	0	0.00025582	0	0.000792616
1404	0.000599419	0	0.00027155	0	0.00082739
1405	0.000592634	0	0.000287264	0	0.0008615
1406	0.000587461	0	0.000303098	0	0.000894856
1407	0.000583653	0	0.0003192	0	0.00092743
1408	0.00058093	0	0.000335718	0	0.000959236
1409	0.00057901	0	0.000352784	0	0.000990323
1410	0.000577634	0	0.000370502	0	0.00102076
1411	0.000576334	0	0.000388437	4.54252e-06	0.00104996
1412	0.000574199	0	0.000405118	2.72219e-05	0.00107605
1413	0.000572024	0	0.000422323	5.17085e-05	0.00110143
1414	0.000569767	0	0.000440001	7.79219e-05	0.00112617
1415	0.000567442	0	0.000458073	0.000105716	0.00115032
1416	0.000565109	0	0.000476437	0.000134888	0.00117392
1417	0.000562859	0	0.000494975	0.000165185	0.00119701
1418	0.000560802	0	0.000513561	0.000196326	0.00121961
1419	0.000559056	0	0.000532068	0.00022801	0.00124173
1420	0.000557734	0	0.000550377	0.000259941	0.00126338
1421	0.000556929	0	0.000568375	0.000291847	0.00128458
1422	0.000556715	0	0.000585966	0.000323497	0.00130535
1423	0.000557135	0	0.000603071	0.000354725	0.00132573
1424	0.0005582	0	0.000619627	0.000385444	0.00134578
1425	0.000559889	0	0.000635589	0.000415662	0.0013656
1426	0.000562152	0	0.000650927	0.000445483	0.00138535
1427	0.000564909	0	0.000665626	0.000475106	0.00140519
1428	0.00056806	0	0.000679683	0.000504802	0.00142533
1429	0.000571489	0	0.000693103	0.000534877	0.00144595
1430	0.000575071	0	0.000705898	0.000565625	0.00146722
1431	0.000578681	0	0.000718082	0.000597261	0.0014892
1432	0.000582196	0	0.000729673	0.000629851	0.00151184
1433	0.000585507	0	0.000740688	0.000663253	0.0015349
1434	0.000588518	0	0.000751143	0.000697061	0.00155791
1435	0.000591151	0	0.000761057	0.000730597	0.00158021
1436	0.000593345	0	0.000770446	0.000762928	0.00160096
1437	0.00059505	0	0.000779328	0.000792934	0.00161916
1438	0.000596229	0	0.000787725	0.000819408	0.0016338
1439	0.000596846	0	0.000795665	0.000841178	0.00164394
1440	0.000596865	0	0.000803178	0.00085724	0.00164879
1441	0.000596244	0	0.000810304	0.000866867	0.00164786
1442	0.000594937	0	0.000817084	0.000869679	0.00164098
1443	0.000592894	0	0.000823566	0.000865672	0.00162832
1444	0.000590064	0	0.000829796	0.000855187	0.00161034
1445	0.000586408	0	0.000835818	0.000838842	0.00158776
1446	0.000581901	0	0.000841668	0.000817435	0.00156144
1447	0.00057654	0	0.000847374	0.000791838	0.00153229
1448	0.000570352	0	0.00085295	0.000762907	0.00150118
1449	0.000563398	0	0.000858397	0.000731408	0.00146888
1450	0.000555766	0	0.000863698	0.000697986	0.00143601
1451	0.000547577	0	0.000868826	0.000663151	0.00140307
1452	0.000538971	0	0.00087374	0.000627296	0.00137038
1453	0.000530107	0	0.000878388	0.000590725	0.00133817
1454	0.000521149	0	0.000882713	0.000553688	0.00130661
1455	0.00051226	0	0.000886657	0.000516409	0.00127578
1456	0.000503596	0	0.000890158	0.000479109	0.00124577
1457	0.000495296	0	0.000893159	0.000442017	0.00121663
1458	0.000487483	0	0.000895609	0.000405369	0.00118842
1459	0.000480256	0	0.000897464	0.000369409	0.0011612
1460	0.000473689	0	0.000898688	0.000334375	0.00113501
1461	0.000467834	0	0.000899254	0.000300491	0.00110991
1462	0.000462718	0	0.000899144	0.000267959	0.00108592
1463	0.00045835	0	0.000898352	0.00023695	0.00106306
1464	0.000454717	0	0.000896875	0.000207599	0.00104132
1465	0.000451793	0	0.000894722	0.000180001	0.0010207
1466	0.00044954	0	0.000891906	0.000154217	0.00100114
1467	0.000447908	0	0.000888445	0.000130267	0.000982613
1468	0.000446844	0	0.000884362	0.000108139	0.000965038
1469	0.000446286	0	0.000879683	8.77895e-05	0.000948344
1470	0.000446175	0	0.000874434	6.91508e-05	0.000932445
1471	0.000446447	0	0.000868645	5.21323e-05	0.000917252
1472	0.000447042	0	0.000862345	3.66271e-05	0.000902672
1473	0.000447899	0	0.000855564	2.25165e-05	0.000888612
1474	0.000448961	0	0.00084833	9.67409e-06	0.000874982
1475	0.000450062	0	0.00084045	0	0.000861405
1476	0.000450786	0	0.000831218	0	0.000846849
1477	0.000451249	1.77702e-06	0.000821816	0	0.000832309
1478	0.000451472	4.99847e-06	0.000812235	0	0.000817766
1479	0.000451673	8.37945e-06	0.000802411	0	0.000803372
1480	0.000451817	1.19099e-05	0.000792351	0	0.000789076
1481	0.000451876	1.55781e-05	0.000782064	0	0.000774839
1482	0.000451829	1.93705e-05	0.000771556	0	0.000760637
1483	0.000451664	2.32717e-05	0.000760834	0	0.000746455
1484	0.000451378	2.72646e-05	0.0007499	0	0.000732292
1485	0.00045098	3.13297e-05	0.000738759	0	0.000718157
1486	0.000450489	3.54454e-05	0.000727413	0	0.000704065
1487	0.000449942	3.95873e-05	0.000715861	0	0.000690034
1488	0.000449392	4.3728e-05	0.000704103	0	0.000676085
1489	0.000448911	4.78365e-05	0.000692135	0	0.000662237
1490	0.000448592	5.18775e-05	0.000679954	0	0.000648502
1491	0.000448547	5.58121e-05	0.000667551	0	0.00063489
1492	0.000448907	5.95972e-05	0.000654922	0	0.000621403
1493	0.000449808	6.31869e-05	0.000642058	0	0.000608043
1494	0.000451381	6.65339e-05	0.000628957	0	0.000594821
1495	0.000453736	6.95917e-05	0.000615616	0	0.000581762
1496	0.000456935	7.23179e-05	0.000602044	0	0.000568926
1497	0.000460976	7.46769e-05	0.000588255	0	0.000556412
1498	0.00046577	7.66433e-05	0.000574277	0	0.000544376
1499	0.000471128	7.82041e-05	0.000560151	0	0.000533033
1500	0.000476767	7.93597e-05	0.000545926	0	0.000522651
1501	0.000482319	8.01232e-05	0.000531666	0	0.000513536
1502	0.000487366	8.05174e-05	0.000517437	0	0.000506002
1503	0.00049148	8.05716e-05	0.000503307	0	0.000500343
1504	0.000494279	8.03158e-05	0.000489335	0	0.00049678
1505	0.000495468	7.97762e-05	0.000475571	0	0.000495436
1506	0.000494882	7.89713e-05	0.000462044	0	0.000496294
1507	0.000492508	7.791e-05	0.000448766	0	0.000499193
1508	0.000488484	7.65917e-05	0.000435726	0	0.000503821
1509	0.000483079	7.50091e-05	0.000422897	0	0.000509743
1510	0.000476657	7.31524e-05	0.000410238	0	0.00051643
1511	0.000469623	7.10138e-05	0.000397705	0	0.000523311
1512	0.000462383	6.85929e-05	0.00038525	0	0.000529814
1513	0.000455294	6.58998e-05	0.000372834	0	0.000535416
1514	0.000448639	6.29569e-05	0.00036043	0	0.000539674
1515	0.000442608	5.97984e-05	0.000348023	0	0.000542249
1516	0.000437301	5.64688e-05	0.000335616	0	0.000542918
1517	0.000432738	5.3019e-05	0.000323223	0	0.000541572
1518	0.00042888	4.95028e-05	0.000310872	0	0.000538204
1519	0.000425649	4.59731e-05	0.000298602	0	0.000532893
1520	0.000422951	4.24789e-05	0.000286458	0	0.000525787
1521	0.000420693	3.90629e-05	0.000274487	0	0.000517076
1522	0.000418797	3.57604e-05	0.000262741	0	0.00050698
1523	0.000417206	3.25992e-05	0.000251268	0	0.000495724
1524	0.000415891	2.96e-05	0.000240115	0	0.000483525
1525	0.000414851	2.67778e-05	0.000229324	0	0.000470581
1526	0.000414107	2.41426e-05	0.000218934	0	0.00045706
1527	0.0004137	2.17014e-05	0.000208974	0	0.000443095
1528	0.000413683	1.94597e-05	0.000199471	0	0.000428783
1529	0.000414111	1.74227e-05	0.000190445	0	0.000414193
1530	0.000415032	1.55972e-05	0.000181912	0	0.000399367
1531	0.000416467	1.39931e-05	0.000173884	0	0.000384336
1532	0.000418404	1.26243e-05	0.000166372	0	0.000369132
1533	0.00042078	1.15103e-05	0.000159389	0	0.000353803
1534	0.000423477	1.06762e-05	0.000152946	0	0.000338422
1535	0.000426313	1.01528e-05	0.000147058	0	0.0003231
1536	0.000429051	9.97484e-06	0.000141744	0	0.000307979
1537	0.000431411	1.01794e-05	0.000137021	0	0.000293238
1538	0.000433092	1.08019e-05	0.000132907	0	0.000279073
1539	0.000433794	1.18727e-05	0.000129415	0	0.000265681
1540	0.000433258	1.34128e-05	0.000126555	0	0.000253243
1541	0.000431288	1.54296e-05	0.000124323	0	0.000241901
1542	0.000427775	1.79146e-05	0.000122707	0	0.000231741
1543	0.000422716	2.08411e-05	0.000121681	0	0.000222781
1544	0.000416213	2.41646e-05	0.000121203	0	0.00021497
1545	0.000408469	2.78245e-05	0.00012122	0	0.000208191
1546	0.000399773	3.17467e-05	0.000121665	0	0.000202268
1547	0.000390489	3.58478e-05	0.000122454	0	0.000196976
1548	0.000381047	4.00383e-05	0.000123484	0	0.000192047
1549	0.000371951	4.4226e-05	0.000124617	0	0.000187167
1550	0.000363801	4.83175e-05	0.000125671	0	0.000181961
1551	0.000357323	5.22195e-05	0.000126399	0	0.000175976
1552	0.000353386	5.58392e-05	0.000126485	0	0.000168671
1553	0.000352967	5.90873e-05	0.000125555	0	0.000159434
1554	0.000357038	6.18843e-05	0.000123222	0	0.000147662
1555	0.000366347	6.41718e-05	0.000119177	0	0.000132899
1556	0.000381103	6.59275e-05	0.000113308	0	0.000115038
1557	0.000400657	6.71819e-05	0.000105831	0	9.45281e-05
1558	0.000423287	6.80281e-05	9.73758e-05	0	7.25143e-05
1559	0.000446218	6.86198e-05	8.8976e-05	0	5.08228e-05
1560	0.000465979	6.91529e-05	8.19385e-05	0	3.17336e-05
1561	0.000479045	6.98305e-05	7.75938e-05	0	1.75625e-05
1562	0.000482629	7.08225e-05	7.69927e-05	0	1.0152e-05
1563	0.000475367	7.22286e-05	8.06426e-05	0	1.04278e-05
1564	0.000457668	7.40598e-05	8.83724e-05	0	1.8173e-05
1565	0.000431595	7.6243e-05	9.93768e-05	0	3.21029e-05
1566	0.000400331	7.86479e-05	0.000112422	0	5.02107e-05
1567	0.000367408	8.1125e-05	0.000126143	0	7.02631e-05
1568	0.000335958	8.35431e-05	0.000139327	0	9.02816e-05
1569	0.000308201	8.58149e-05	0.000151115	0	0.000108871
1570	0.000285261	8.79052e-05	0.000161069	0	0.000125334
1571	0.00026728	8.98248e-05	0.000169129	0	0.000139596
1572	0.000253714	9.16143e-05	0.000175496	0	0.000152006
1573	0.000243681	9.33264e-05	0.000180504	0	0.000163113
1574	0.000236244	9.50111e-05	0.000184502	0	0.000173476
1575	0.00023059	9.67065e-05	0.000187795	0	0.000183548
1576	0.000226113	9.84358e-05	0.000190603	0	0.000193621
1577	0.000222407	0.000100207	0.000193069	0	0.000203832
1578	0.000218727	0.000101828	0.000194165	9.94788e-06	0.000212786
1579	0.000215084	0.000103333	0.000194199	2.7343e-05	0.000220738
1580	0.000211827	0.000104852	0.00019402	4.45811e-05	0.000228594
1581	0.00020897	0.000106371	0.000193634	6.14655e-05	0.000236183
1582	0.000206554	0.000107875	0.000193042	7.77809e-05	0.000243314
1583	0.000204632	0.000109352	0.000192245	9.3308e-05	0.000249799
1584	0.000203261	0.000110794	0.000191241	0.000107836	0.000255458
1585	0.000202494	0.000112194	0.000190031	0.000121173	0.00026013
1586	0.00020238	0.000113551	0.00018862	0.000133156	0.000263683
1587	0.000202956	0.000114868	0.000187011	0.000143657	0.000266018
1588	0.000204244	0.000116149	0.000185215	0.000152592	0.000267078
1589	0.000206249	0.000117405	0.000183242	0.000159922	0.000266848
1590	0.000208957	0.000118646	0.000181108	0.000165656	0.000265357
1591	0.000212333	0.000119885	0.00017883	0.00016985	0.000262679
1592	0.00021632	0.000121134	0.000176429	0.000172604	0.00025893
1593	0.000220841	0.000122407	0.000173928	0.00017406	0.00025426
1594	0.000225804	0.000123711	0.000171352	0.000174388	0.000248852
1595	0.000231105	0.000125055	0.000168727	0.000173786	0.000242909
1596	0.000236632	0.000126441	0.000166079	0.000172464	0.000236646
1597	0.000242277	0.000127869	0.000163435	0.000170638	0.000230283
1598	0.000247938	0.000129334	0.000160818	0.000168517	0.000224033
1599	0.00025353	0.000130827	0.00015825	0.000166298	0.000218096
1600	0.00025899	0.000132337	0.000155748	0.000164154	0.000212647
1601	0.000264283	0.00013385	0.000153325	0.000162229	0.000207837
1602	0.000269404	0.000135351	0.000150992	0.000160634	0.000203783
1603	0.000274381	0.000136824	0.00014875	0.000159443	0.000200568
1604	0.000279274	0.000138258	0.000146597	0.000158692	0.000198245
1605	0.00028417	0.000139642	0.000144527	0.000158382	0.000196835
1606	0.000289182	0.000140974	0.000142526	0.000158481	0.000196332
1607	0.000294438	0.000142254	0.00014058	0.000158927	0.000196709
1608	0.000300075	0.000143493	0.000138666	0.000159635	0.000197925
1609	0.000306232	0.000144708	0.000136763	0.0001605	0.000199927
1610	0.000313042	0.000145926	0.000134846	0.000161408	0.000202663
1611	0.000320625	0.000147183	0.000132889	0.000162235	0.00020608
1612	0.000329081	0.000148524	0.000130866	0.000162858	0.000210132
1613	0.000338489	0.000150002	0.000128753	0.000163155	0.000214785
1614	0.0003489	0.000151678	0.000126526	0.000163012	0.000220015
1615	0.00036034	0.000153618	0.000124162	0.000162324	0.00022581
1616	0.000372806	0.000155893	0.000121641	0.000160998	0.000232169
1617	0.000386274	0.000158573	0.000118948	0.000158955	0.000239101
1618	0.000400692	0.00016173	0.000116066	0.000156131	0.000246624
1619	0.000415993	0.000165427	0.000112984	0.000152478	0.000254758
1620	0.000432091	0.000169719	0.000109696	0.000147965	0.000263523
1621	0.000448894	0.000174646	0.000106194	0.000142578	0.000272935
1622	0.000466311	0.000180227	0.000102474	0.000136313	0.000282993
1623	0.000484283	0.000186455	9.85254e-05	0.00012917	0.000293669
1624	0.000502827	0.000193288	9.43233e-05	0.000121124	0.000304875
1625	0.000522122	0.000200638	8.98052e-05	0.000112086	0.000316416
1626	0.000542639	0.000208358	8.48398e-05	0.000101827	0.000327921
1627	0.000565304	0.000216231	7.91857e-05	8.98968e-05	0.000338746
1628	0.000591641	0.000223956	7.24557e-05	7.55364e-05	0.000347898
1629	0.000623796	0.000231147	6.41151e-05	5.76685e-05	0.000354028
1630	0.000664278	0.00023736	5.3554e-05	3.50279e-05	0.000355567
1631	0.000715323	0.000242141	4.02631e-05	6.50302e-06	0.000351092
1632	0.00077643	0.000244578	2.09538e-05	0	0.000335919
1633	0.000846727	0.000244853	0	0	0.000312431
1634	0.000919689	0.000243709	0	0	0.000278731
1635	0.000990529	0.000241117	0	0	0.000246072
1636	0.00105039	0.000237809	0	0	0.00022117
1637	0.00109083	0.000234646	0	0	0.000210382
1638	0.00110613	0.000232408	0	0	0.000217941
1639	0.00109491	0.000231592	0	0	0.000244731
1640	0.00106041	0.000232287	0	0	0.000288066
1641	0.0010095	0.000234169	0	0	0.000342524
1642	0.000950772	0.000236609	0	0	0.000401412
1643	0.000892584	0.000238847	0	0	0.000458303
1644	0.000841146	0.00024027	3.62776e-06	0	0.000507141
1645	0.000800261	0.00024046	1.44024e-05	0	0.000543796
1646	0.000772993	0.000238922	2.0859e-05	0	0.000570194
1647	0.000758543	0.000235567	2.25785e-05	6.88303e-06	0.00058567
1648	0.000755117	0.00023081	2.1252e-05	1.28847e-05	0.000592776
1649	0.000759419	0.000225121	1.84347e-05	1.47262e-05	0.00059428
1650	0.000767087	0.000218923	1.52955e-05	1.4769e-05	0.000592676
1651	0.000773547	0.000212628	1.30641e-05	1.54967e-05	0.000590579
1652	0.00077468	0.000206582	1.28532e-05	1.91495e-05	0.000590354
1653	0.000767482	0.000201035	1.54619e-05	2.73669e-05	0.000593748
1654	0.000750563	0.000196126	2.1218e-05	4.09201e-05	0.000601614
1655	0.000724321	0.000191886	2.99165e-05	5.96179e-05	0.00061381
1656	0.000690717	0.000188256	4.08809e-05	8.24226e-05	0.00062933
1657	0.000652726	0.000185117	5.31317e-05	0.000107745	0.000646598
1658	0.000613618	0.00018233	6.56086e-05	0.000133826	0.000663878
1659	0.000576283	0.000179761	7.73808e-05	0.000159095	0.000679638
1660	0.000542782	0.000177306	8.77884e-05	0.000182412	0.000692801
1661	0.000514183	0.0001749	9.64919e-05	0.000203153	0.000702838
1662	0.00049067	0.000172511	0.000103439	0.000221157	0.000709706
1663	0.000471808	0.000170134	0.000108782	0.000236585	0.000713701
1664	0.000456853	0.000167774	0.000112772	0.000249758	0.000715287
1665	0.00044502	0.000165444	0.000115684	0.000261014	0.00071495
1666	0.000435654	0.000163152	0.00011775	0.000270626	0.000713102
1667	0.000428308	0.0001609	0.000119141	0.000278753	0.00071004
1668	0.000422747	0.000158684	0.000119962	0.000285449	0.000705945
1669	0.000418906	0.000156499	0.000120262	0.000290683	0.000700903
1670	0.000416836	0.000154337	0.000120053	0.000294371	0.000694941
1671	0.000416635	0.00015219	0.000119328	0.00029641	0.000688058
1672	0.000418394	0.000150055	0.000118079	0.000296713	0.000680262
1673	0.000422143	0.000147935	0.000116316	0.000295235	0.000671595
1674	0.000427812	0.000145836	0.000114076	0.000291999	0.000662159
1675	0.000435193	0.000143776	0.000111436	0.00028711	0.000652131
1676	0.000443922	0.000141777	0.000108519	0.000280766	0.000641773
1677	0.000453485	0.000139872	0.000105495	0.00027326	0.000631431
1678	0.000463233	0.000138098	0.000102574	0.000264966	0.000621522
1679	0.000472425	0.000136496	9.9991e-05	0.000256317	0.000612508
1680	0.000480296	0.000135112	9.79888e-05	0.000247771	0.000604861
1681	0.000486125	0.000133987	9.67938e-05	0.000239771	0.000599019
1682	0.000489313	0.000133158	9.65919e-05	0.000232705	0.00059534
1683	0.000489453	0.000132656	9.75065e-05	0.000226872	0.000594067
1684	0.000486376	0.000132502	9.95838e-05	0.000222451	0.000595296
1685	0.000480175	0.000132703	0.000102785	0.000219496	0.000598966
1686	0.000471193	0.000133259	0.000106989	0.000217937	0.000604859
1687	0.000459986	0.00013416	0.000112006	0.000217605	0.000612623
1688	0.000447265	0.000135388	0.000117593	0.000218259	0.000621805
1689	0.000433817	0.000136921	0.000123481	0.000219629	0.000631896
1690	0.000420432	0.000138737	0.000129397	0.000221455	0.000642367
1691	0.000407839	0.000140814	0.000135086	0.00022352	0.000652712
1692	0.000396649	0.000143134	0.000140325	0.000225671	0.000662478
1693	0.000387333	0.000145682	0.000144937	0.000227836	0.000671282
1694	0.000380207	0.000148451	0.000148793	0.000230016	0.000678818
1695	0.000375442	0.000151437	0.000151807	0.000232279	0.000684859
1696	0.000373088	0.000154642	0.000153937	0.000234739	0.000689243
1697	0.000373094	0.000158071	0.00015517	0.000237531	0.000691864
1698	0.000375345	0.000161734	0.00015552	0.000240787	0.000692655
1699	0.000379683	0.000165644	0.000155019	0.000244616	0.000691582
1700	0.000385926	0.000169819	0.000153708	0.000249083	0.000688627
1701	0.000393885	0.000174276	0.00015164	0.000254199	0.000683791
1702	0.000403374	0.00017904	0.000148871	0.000259915	0.000677085
1703	0.000414216	0.000184134	0.000145462	0.000266116	0.00066853
1704	0.00042625	0.000189586	0.000141472	0.00027263	0.00065816
1705	0.000439339	0.000195423	0.000136961	0.000279228	0.000646012
1706	0.000453387	0.000201671	0.00013198	0.000285634	0.00063213
1707	0.000468355	0.000208354	0.000126566	0.000291533	0.000616552
1708	0.000484281	0.000215488	0.000120732	0.000296576	0.000599303
1709	0.0005013	0.000223084	0.000114466	0.000300393	0.000580387
1710	0.000519652	0.000231139	0.00010772	0.000302602	0.000559782
1711	0.000539665	0.000239643	0.000100419	0.00030284	0.000537445
1712	0.000561716	0.000248571	9.24715e-05	0.000300787	0.000513334
1713	0.000586146	0.000257892	8.37934e-05	0.000296225	0.00048745
1714	0.000613154	0.000267571	7.43453e-05	0.00028909	0.000459885
1715	0.000642665	0.000277571	6.41715e-05	0.00027954	0.000430894
1716	0.000674222	0.000287862	5.34357e-05	0.000268003	0.000400937
1717	0.000706927	0.00029842	4.24416e-05	0.000255199	0.000370712
1718	0.000739468	0.00030923	3.16252e-05	0.000242107	0.000341127
1719	0.000770253	0.000320277	2.15146e-05	0.000229881	0.000313212
1720	0.00079765	0.000331542	1.26588e-05	0.00021971	0.000287994
1721	0.000820283	0.000342985	5.53687e-06	0.00021265	0.000266315
1722	0.000837323	0.00035454	4.67829e-07	0.000209457	0.000248678
1723	0.000848474	0.000366171	0	0.000209694	0.000234574
1724	0.000854896	0.000377625	0	0.000214471	0.000224427
1725	0.000858128	0.000388734	0	0.00022324	0.000217345
1726	0.000860147	0.000399333	0	0.000234941	0.000211997
1727	0.000862991	0.000409302	9.23846e-07	0.000248047	0.000206729
1728	0.000868594	0.00041853	2.68709e-06	0.000261363	0.000200223
1729	0.000878576	0.00042692	3.62936e-06	0.000274341	0.000191786
1730	0.000893885	0.000434476	3.29722e-06	0.000286243	0.000180795
1731	0.000915001	0.000441272	1.31815e-06	0.000296422	0.000166872
1732	0.000941953	0.000447508	0	0.000303344	0.000149133
1733	0.000975062	0.000453366	0	0.000305776	0.000126937
1734	0.00101519	0.000458976	0	0.000302796	9.98158e-05
1735	0.00106339	0.000464497	0	0.000292852	6.67687e-05
1736	0.00112067	0.00047008	0	0.000274499	2.68077e-05
1737	0.00118429	0.00047497	0	0.00023852	0
1738	0.00125125	0.00047879	0	0.000179807	0
1739	0.00132317	0.000483087	0	0.000111718	0
1740	0.00139646	0.000488302	0	3.89595e-05	0
1741	0.00146419	0.000494022	0	0	0
1742	0.00152357	0.000500534	0	0	0
1743	0.0015777	0.000508902	0	0	0
1744	0.00162747	0.000518729	0	0	0
1745	0.00167401	0.000529337	0	0	0
1746	0.00171714	0.00054013	0	0	0
1747	0.00175213	0.000550322	0	2.37354e-05	0
1748	0.00177549	0.000560315	0	6.66697e-05	0
1749	0.00179059	0.000572405	0	5.68673e-05	0
1750	0.00179478	0.000586659	0	0	0
1751	0.00177641	0.000600403	0	0	0
1752	0.00173771	0.000615362	0	0	0
1753	0.00167359	0.000632253	0	0	0
1754	0.00158048	0.000652004	0	0	0
1755	0.00146097	0.000675079	0	0	0
1756	0.00132564	0.000701012	0	0	0
1757	0.00118986	0.00072854	0	0	0
1758	0.00106067	0.000754295	0	7.39937e-05	0
1759	0.000950453	0.000778368	0	0.000179527	0
1760	0.000864494	0.00080201	1.12457e-05	0.00025828	0
1761	0.000799723	0.000825317	3.25297e-05	0.000312727	0
1762	0.000750536	0.000847218	4.17954e-05	0.000347491	2.19262e-05
1763	0.000714342	0.000869113	4.53383e-05	0.000373147	4.48764e-05
1764	0.000687941	0.000891689	4.6318e-05	0.000394937	6.1839e-05
1765	0.000668133	0.000915147	4.57666e-05	0.000414455	7.44928e-05
1766	0.000652563	0.000939635	4.44331e-05	0.000432847	8.41025e-05
1767	0.000639475	0.00096525	4.28701e-05	0.000450931	9.16486e-05
1768	0.000627576	0.000992031	4.14809e-05	0.000469252	9.78945e-05
1769	0.000615968	0.00101996	4.05434e-05	0.000488112	0.000103416
1770	0.000604084	0.00104898	4.02288e-05	0.000507596	0.000108625
1771	0.000591633	0.00107897	4.06181e-05	0.000527595	0.000113784
1772	0.000578546	0.0011098	4.17184e-05	0.000547839	0.000119031
1773	0.00056493	0.0011413	4.34738e-05	0.000567928	0.000124388
1774	0.000551064	0.00117331	4.57648e-05	0.000587349	0.000129753
1775	0.000537451	0.00120571	4.83848e-05	0.000605486	0.000134864
1776	0.000524972	0.00123848	5.09803e-05	0.000621601	0.000139203
1777	0.000515128	0.00127174	5.29547e-05	0.000634795	0.000141846
1778	0.000510269	0.0013059	5.33823e-05	0.000643965	0.000141334
1779	0.00051348	0.00134154	5.1051e-05	0.000647866	0.000135749
1780	0.00052772	0.00137931	4.47936e-05	0.000645361	0.000123239
1781	0.000554072	0.00141936	3.41628e-05	0.000635915	0.000103095
1782	0.000589713	0.00146089	2.02125e-05	0.000620158	7.69823e-05
1783	0.000627048	0.00150189	5.83173e-06	0.00060013	4.94758e-05
1784	0.000654928	0.00153974	0	0.000577291	2.59516e-05
1785	0.000664333	0.00157181	0	0.000556476	1.3694e-05
1786	0.000651884	0.00159693	0	0.000541436	1.68819e-05
1787	0.000619891	0.00161646	1.00003e-05	0.000528137	3.10219e-05
1788	0.00057724	0.00163292	2.69212e-05	0.000514559	5.07437e-05
1789	0.000534195	0.00164901	4.3965e-05	0.000499494	7.0793e-05
1790	0.000497719	0.00166672	5.84123e-05	0.000481671	8.71142e-05
1791	0.000470128	0.00168682	6.93363e-05	0.000461088	9.84719e-05
1792	0.000450014	0.00170905	7.72521e-05	0.000438734	0.000105889
1793	0.000434296	0.00173268	8.33288e-05	0.000416017	0.000111402
1794	0.000419964	0.00175698	8.87161e-05	0.000394263	0.000116988
1795	0.000404931	0.0017814	9.42203e-05	0.000374477	0.000124057
1796	0.000388115	0.0018056	0.00010027	0.000357303	0.000133385
1797	0.000369187	0.00182943	0.000107013	0.000343086	0.000145262
1798	0.000348281	0.00185281	0.000114427	0.000331942	0.000159667
1799	0.00032578	0.00187571	0.000122398	0.000323816	0.000176384
1800	0.000302194	0.00189815	0.000130765	0.000318521	0.00019508
1801	0.000278085	0.00192016	0.000139348	0.00031576	0.000215342
1802	0.000254011	0.00194178	0.000147961	0.000315154	0.000236713
1803	0.000230494	0.00196309	0.000156427	0.000316261	0.000258715
1804	0.000207988	0.00198418	0.000164587	0.000318605	0.000280873
1805	0.000186858	0.00200515	0.000172305	0.000321693	0.000302736
1806	0.00016737	0.00202614	0.000179471	0.00032504	0.000323895
1807	0.000149685	0.00204729	0.000186007	0.000328189	0.000343998
1808	0.000133867	0.00206874	0.000191859	0.000330729	0.000362761
1809	0.000119892	0.00209065	0.000197002	0.000332311	0.000379977
1810	0.000107678	0.00211318	0.000201425	0.000332651	0.000395511
1811	9.71101e-05	0.00213649	0.000205128	0.000331537	0.000409294
1812	8.81031e-05	0.00216072	0.000208104	0.000328803	0.000421301
1813	8.06749e-05	0.00218599	0.000210313	0.000324307	0.000431506
1814	7.50527e-05	0.00221243	0.000211657	0.000317869	0.000439824
1815	7.17871e-05	0.0022401	0.00021194	0.000309214	0.000446044
1816	7.18318e-05	0.00226906	0.000210844	0.000297918	0.000449772
1817	7.65077e-05	0.00229932	0.00020795	0.000283416	0.00045044
1818	8.72627e-05	0.00233088	0.000202804	0.000265119	0.000447425
1819	0.000105176	0.00236372	0.000195084	0.000242656	0.000440309
1820	0.000130277	0.00239788	0.000184806	0.000216226	0.000429244
1821	0.000160902	0.0024334	0.000172533	0.000186919	0.000415293
1822	0.000193436	0.00247043	0.000159448	0.000156847	0.000400573
1823	0.000222733	0.00250915	0.000147219	0.000128902	0.000388011
1824	0.000243282	0.00254975	0.000137623	0.00010613	0.000380701
1825	0.000250797	0.00259236	0.000132035	9.08748e-05	0.00038103
1826	0.000243648	0.00263703	0.000130973	8.40148e-05	0.000389889
1827	0.000223515	0.00268365	0.000133881	8.46123e-05	0.000406318
1828	0.000194972	0.002732	0.000139258	9.01393e-05	0.000427751
1829	0.00016417	0.0027818	0.000145072	9.71857e-05	0.000450743
1830	0.000137161	0.00283274	0.000149304	0.000102367	0.000471911
1831	0.000118442	0.00288457	0.000150416	0.000103115	0.000488737
1832	0.000110129	0.00293707	0.00014763	9.81333e-05	0.000500021
1833	0.000111812	0.00299009	0.000140996	8.75029e-05	0.000505961
1834	0.000120928	0.00304345	0.000131287	7.24965e-05	0.000507934
1835	0.00013344	0.00309697	0.0001198	5.52346e-05	0.000508118
1836	0.000144658	0.00315037	0.000108094	3.82565e-05	0.000509031
1837	0.00015011	0.00320327	9.77083e-05	2.40599e-05	0.000513049
1838	0.00014636	0.00325514	8.98935e-05	1.46559e-05	0.000521951
1839	0.00013165	0.00330532	8.53871e-05	1.1216e-05	0.000536575
1840	0.000106191	0.00335303	8.4303e-05	1.38957e-05	0.000556658
1841	7.20142e-05	0.00339739	8.61627e-05	2.18903e-05	0.000580935
1842	3.24043e-05	0.00343753	9.00615e-05	3.37086e-05	0.000607455
1843	0	0.00347045	9.20901e-05	4.32991e-05	0.000629599
1844	0	0.00349006	8.43142e-05	3.85286e-05	0.000634525
1845	0	0.00350463	7.70612e-05	3.49071e-05	0.000638231
1846	0	0.00351433	7.03413e-05	3.23458e-05	0.000640642
1847	0	0.00351929	6.41469e-05	3.07224e-05	0.000641777
1848	0	0.0035197	5.84603e-05	2.98754e-05	0.00064173
1849	0	0.00351583	5.32609e-05	2.9604e-05	0.000640637
1850	0	0.00350803	4.85308e-05	2.96761e-05	0.000638653
1851	0	0.00349679	4.42595e-05	2.98466e-05	0.000635924
1852	0	0.00348262	4.04476e-05	2.98813e-05	0.000632573
1853	0	0.00346606	3.71096e-05	2.95816e-05	0.000628689
1854	0	0.0034476	3.42767e-05	2.88064e-05	0.00062432
1855	0	0.00342768	3.19957e-05	2.74852e-05	0.000619477
1856	0	0.00340662	3.0326e-05	2.56227e-05	0.000614134
1857	0	0.00338464	2.93305e-05	2.32926e-05	0.000608241
1858	0	0.00336185	2.90614e-05	2.06228e-05	0.000601742
1859	0	0.00333829	2.95415e-05	1.77736e-05	0.000594586
1860	0	0.00331389	3.07468e-05	1.49126e-05	0.000586752
1861	0	0.00328854	3.25948e-05	1.21899e-05	0.000578262
1862	0	0.0032621	3.49464e-05	9.71803e-06	0.000569182
1863	0	0.00323443	3.76259e-05	7.55901e-06	0.000559624
1864	0	0.00320542	4.04571e-05	5.72216e-06	0.000549719
1865	0	0.00317502	4.33076e-05	4.17184e-06	0.000539599
1866	0	0.00314327	4.61255e-05	2.84457e-06	0.000529365
1867	0	0.00311035	4.8954e-05	1.67227e-06	0.000519078
1868	0	0.0030765	5.19098e-05	6.07836e-07	0.000508754
1869	0	0.00304205	5.50834e-05	0	0.000498326
1870	0	0.00300733	5.8545e-05	0	0.000487778
1871	1.39656e-06	0.00297235	6.18203e-05	0	0.000476461
1872	2.02143e-05	0.00293316	5.86472e-05	0	0.000455189
1873	3.70381e-05	0.00289515	5.61179e-05	0	0.000435419
1874	4.98526e-05	0.00285906	5.46504e-05	0	0.000418525
1875	5.69865e-05	0.0028255	5.4577e-05	0	0.000405658
1876	5.76152e-05	0.00279487	5.60475e-05	0	0.000397406
1877	5.20439e-05	0.00276728	5.89785e-05	0	0.000393606
1878	4.16661e-05	0.00274259	6.30629e-05	0	0.000393368
1879	2.84565e-05	0.00272036	6.7512e-05	2.95912e-06	0.0003949
1880	1.44991e-05	0.00270008	7.13239e-05	1.33356e-05	0.000396073
1881	2.18716e-06	0.00268146	7.50424e-05	2.22514e-05	0.000396885
1882	0	0.0026624	7.61543e-05	2.5354e-05	0.000393096
1883	0	0.00264476	7.71768e-05	2.62691e-05	0.000388721
1884	0	0.00262889	7.86474e-05	2.59593e-05	0.000384953
1885	0	0.00261455	8.03231e-05	2.44326e-05	0.000381907
1886	0	0.00260146	8.19555e-05	2.17829e-05	0.000379673
1887	0	0.00258941	8.33588e-05	1.81747e-05	0.000378294
1888	0	0.0025782	8.44492e-05	1.3827e-05	0.000377746
1889	0	0.00256769	8.52508e-05	8.9957e-06	0.000377945
1890	0	0.00255779	8.58723e-05	3.95604e-06	0.000378766
1891	0	0.00254842	8.63351e-05	0	0.000379893
1892	0	0.00253946	8.64552e-05	0	0.00038075
1893	0	0.00253106	8.69061e-05	0	0.000381953
1894	0	0.00252325	8.77883e-05	0	0.000383478
1895	0	0.00251611	8.91417e-05	0	0.000385344
1896	0	0.00250974	9.09519e-05	0	0.000387603
1897	0	0.00250433	9.31649e-05	0	0.00039033
1898	0	0.00250007	9.57029e-05	0	0.000393607
1899	0	0.00249725	9.84789e-05	0	0.000397511
1900	0	0.00249612	0.000101408	0	0.000402095
1901	0	0.00249693	0.000104415	0	0.000407377
1902	0	0.00249983	0.000107439	0	0.00041332
1903	0	0.00250482	0.00011044	0	0.000419822
1904	0	0.00251164	0.000113221	1.33577e-06	0.000426477
1905	0	0.00251977	0.000115529	5.95232e-06	0.000432694
1906	0	0.00252859	0.000117754	1.10133e-05	0.000438615
1907	2.63815e-06	0.0025365	0.000119077	1.53838e-05	0.000442493
1908	7.43144e-06	0.00254258	0.000119675	1.94521e-05	0.000444089
1909	1.02609e-05	0.00254675	0.00012088	2.53271e-05	0.000444963
1910	1.07288e-05	0.00254819	0.000122842	3.32477e-05	0.000444854
1911	8.60612e-06	0.00254626	0.000125652	4.32387e-05	0.000443488
1912	3.89485e-06	0.00254067	0.00012932	5.50477e-05	0.00044059
1913	0	0.00253068	0.000132767	6.66151e-05	0.000434317
1914	0	0.00251606	0.000135009	7.58924e-05	0.000423128
1915	0	0.00249865	0.000137268	8.40899e-05	0.000409088
1916	0	0.00247955	0.000139527	9.05279e-05	0.000392419
1917	0	0.00245991	0.000141762	9.4588e-05	0.000373417
1918	0	0.00244081	0.000143951	9.57847e-05	0.000352422
1919	0	0.00242312	0.000146075	9.38199e-05	0.000329795
1920	0	0.00240743	0.000148116	8.86106e-05	0.000305907
1921	0	0.00239395	0.000150057	8.02905e-05	0.000281128
1922	0	0.00238257	0.000151887	6.9187e-05	0.000255834
1923	0	0.00237289	0.000153595	5.57769e-05	0.000230396
1924	0	0.00236429	0.000155172	4.063e-05	0.000205174
1925	9.45226e-06	0.00235375	0.000153609	1.98054e-05	0.000175782
1926	1.96409e-05	0.00234275	0.000151418	0	0.000146529
1927	2.62592e-05	0.00233138	0.000147846	0	0.000117026
1928	3.05892e-05	0.00231969	0.000145046	0	9.01174e-05
1929	3.35579e-05	0.00230738	0.000142711	0	6.53992e-05
1930	3.63394e-05	0.00229418	0.000140426	0	4.22681e-05
1931	3.97947e-05	0.00227986	0.000137891	0	2.02823e-05
1932	4.38912e-05	0.00226428	0.000134994	0	0
1933	4.49542e-05	0.00224636	0.000127949	0	0
1934	4.4298e-05	0.00222738	0.000122534	0	0
1935	3.99028e-05	0.00220751	0.000119947	0	0
1936	3.01068e-05	0.00218691	0.000121162	0	0
1937	1.42029e-05	0.00216567	0.000126578	0	0
1938	0	0.00214141	0.000131739	0	0
1939	0	0.00211049	0.000129496	0	0
1940	0	0.00207821	0.000127779	0	0
1941	0	0.00204522	0.000126482	0	0
1942	0	0.00201213	0.000125516	0	0
1943	0	0.00197935	0.000124815	0	0
1944	0	0.00194713	0.000124342	0	0
1945	0	0.00191555	0.000124083	0	0
1946	0	0.00188461	0.000124045	0	0
1947	0	0.00185425	0.000124245	0	0
1948	0	0.00182443	0.000124705	0	0
1949	0	0.00179516	0.000125447	0	0
1950	0	0.00176648	0.000126491	0	0
1951	0	0.00173845	0.000127857	0	0
1952	0	0.00171117	0.000129557	0	0
1953	0	0.00168474	0.000131597	0	0
1954	0	0.00165927	0.000133976	0	0
1955	0	0.00163486	0.00013668	0	0
1956	0	0.00161157	0.000139681	0	0
1957	0	0.00158949	0.000142938	0	0
1958	0	0.00156866	0.000146388	0	0
1959	0	0.00154878	0.000148948	0	3.15915e-06
1960	0	0.0015297	0.00014996	0	1.12482e-05
1961	0	0.00151197	0.000150944	0	1.91613e-05
1962	0	0.00149563	0.000151855	0	2.66787e-05
1963	0	0.00148071	0.000152644	0	3.35814e-05
1964	0	0.00146725	0.000153265	0	3.96655e-05
1965	0	0.00145529	0.00015367	0	4.4756e-05
1966	0	0.00144487	0.000153817	0	4.87201e-05
1967	0	0.00143601	0.000153672	0	5.14772e-05
1968	0	0.00142874	0.000153208	0	5.30047e-05
1969	0	0.00142305	0.000152411	0	5.33399e-05
1970	0	0.00141891	0.000151276	0	5.25758e-05
1971	0	0.00141621	0.000149816	0	5.08529e-05
1972	0	0.00141481	0.000148053	0	4.83462e-05
1973	0	0.00141447	0.000146026	0	4.52506e-05
1974	0	0.00141488	0.000143783	0	4.17648e-05
1975	0	0.00141564	0.000141384	0	3.8076e-05
1976	3.01305e-07	0.0014162	0.000138781	0	3.41727e-05
1977	9.58488e-06	0.00141374	0.000132741	0	2.51437e-05
1978	1.88202e-05	0.00141012	0.000126771	0	1.6329e-05
1979	2.7899e-05	0.00140483	0.000120977	0	7.85023e-06
1980	3.66914e-05	0.00139744	0.000115406	0	0
1981	4.40452e-05	0.00138717	0.000108456	0	0
1982	5.10704e-05	0.00137423	0.000102029	0	0
1983	5.77239e-05	0.00135852	9.6159e-05	0	0
1984	6.39786e-05	0.0013401	9.0859e-05	0	0
1985	6.98191e-05	0.00131914	8.61224e-05	0	0
1986	7.52362e-05	0.00129593	8.19318e-05	0	0
1987	8.02215e-05	0.00127085	7.82651e-05	0	0
1988	8.47646e-05	0.00124432	7.51002e-05	0	0
1989	8.88551e-05	0.00121676	7.2416e-05	0	0
1990	9.24893e-05	0.00118858	7.01904e-05	0	0
1991	9.56844e-05	0.00116013	6.83927e-05	0	0
1992	9.84962e-05	0.0011317	6.6973e-05	0	0
1993	0.000101039	0.0011035	6.58508e-05	0	0
1994	0.0001035	0.00107567	6.49046e-05	0	0
1995	0.000106148	0.0010483	6.39677e-05	0	0
[truncated: 2,005 more rows]
